# Supplementary material for: Insulin like growth factor 2 mRNA binding protein 2 regulates vascular development in cerebral arteriovenous malformations
Source: Front Neurol. 2024 Dec 11;15:1483016. doi: 10.3389/fneur.2024.1483016 (PMC11668662; doi:10.3389/fneur.2024.1483016)
Supplement: Supplementary file 3 [file Table_1.XLSX]

## Sheet: Sheet1
Supplementary Table 1. siRNAs and shRNAs used in this study
Target	siRNA sequences
LGALS8-1-S	5’-GGCCUUUCAUUUCAAUCCUTT-3’
LGALS8-1-AS	5’-AGGAUUGAAAUGAAAGGCCTT-3’
LGALS8-2-S	5’-GAGGAGGAGACAUUUCUAATT-3’
LGALS8-2-AS	5’-UUAGAAAUGUCUCCUCCUCTT-3’
LGALS8-3-S	5’-GACGAACUGUCGUCGUUAATT-3’
LGALS8-3-AS	5’-UUAACGACGACAGUUCGUCTT-3’
LGALS8-4-S	5’-GUCCUGGGAUGUACUUUGATT-3’
LGALS8-4-AS	5’-UCAAAGUACAUCCCAGGACTT-3’
Negative control-S	5'-UUCUCCGAACGUGUCACGUTT-3'
Negative control-AS	5'-ACGUGACACGUUCGGAGAATT-3'
Target	shRNA sequences
IGF2BP2-1	5’-TCAGGCCAGACAGATTGATTT-3’
IGF2BP2-2	5’-ATGCCGCATGATTCTTGAAAT-3’
IGF2BP2-3	5’-ATGAAACAGGGACCAAGATAA-3’
Negative control	5’-TTCTCCGAACGTGTCACGT-3’
