# Supplementary material for: Insulin like growth factor 2 mRNA binding protein 2 regulates vascular development in cerebral arteriovenous malformations
Source: Front Neurol. 2024 Dec 11;15:1483016. doi: 10.3389/fneur.2024.1483016 (PMC11668662; doi:10.3389/fneur.2024.1483016)
Supplement: Supplementary file 4 [file Table_2.XLSX]

## Sheet: Sheet1
Supplementary Table 2. Primers used in this study
Target	Primer sequences
IGF2BP2-Forward	5’-AGCTAAGCGGGCATCAGTTTG-3’
IGF2BP2-Reverse	5’-CCGCAGCGGGAAATCAATCT-3’
LGALS8-Forward	5’-ATACGTGGGCATGTTCCTAGT-3’
LGALS8-Reverse	5’-CGGCCCTTTTGAAACGAGG-3’
igf2bp2a-Forward	5’-CAGCCGTGATTTATGCTGGC-3’
igf2bp2a-Reverse	5’-AGATGCGCGAGCCTTACTTT-3’
igf2bp2b-Forward	5’-AGCATGTGCTTATGTGCAAGAT-3’
igf2bp2b-Reverse	5’-GCAAGTGTAAACTTTGACAGCAA-3’
lgals8a-1-Forward	5’-ACAAACAACTTGCTGTGCATTG-3’
lgals8a-1-Reverse	5’-TCCCTTAAAGCTGATATGACATGG-3’
lgals8a-2-Forward	5’-GAGTGCATTGTGTCTGAGGG-3’
lgals8a-2-Reverse	5’-ACTGCAGTTGATTTTCCTTCTGT-3’
lgals8b-Forward	5’-TGGCCACCCCTGGCATATTA-3’
lgals8b-Reverse	5’-ACTAACAAGTGCAAAGTGGTCAAAT-3’
