# Supplementary material for: Insulin like growth factor 2 mRNA binding protein 2 regulates vascular development in cerebral arteriovenous malformations
Source: Front Neurol. 2024 Dec 11;15:1483016. doi: 10.3389/fneur.2024.1483016 (PMC11668662; doi:10.3389/fneur.2024.1483016)
Supplement: Supplementary file 5 [file Table_3.XLSX]

## Sheet: Sheet1
Supplementary Table 3. gRNAs used in this study
Target	Target sequences	Target	Primer sequences
igf2bp2a 1s	GAGTCCTTCGGTGACCGTGG-AGG Forward 1st exon	igf2bp2a 1s	TTAATACGACTCACTATAGAGTCCTTCGGTGACCGTGGGTTTTAGAGCTAGAAATAG
igf2bp2a 2s	GGATTTGAGCAGGACCTGGT-CGG Reverse 1st exon	igf2bp2a 2s	TTAATACGACTCACTATAGGATTTGAGCAGGACCTGGTGTTTTAGAGCTAGAAATAG
igf2bp2a 3s	CTGGTCGGGGAAGTCCACGA-AGG Reverse 1st exon	igf2bp2a 3s	TTAATACGACTCACTATAGCTGGTCGGGGAAGTCCACGAGTTTTAGAGCTAGAAATAG
igf2bp2a 4s	GGACTTCCCCGACCAGAACT-GGG Forward 1st exon	igf2bp2a 4s	TTAATACGACTCACTATAGGACTTCCCCGACCAGAACTGTTTTAGAGCTAGAAATAG
igf2bp2b 1s	GGAAGTTCCTTTGAAGATCT-TGG Forward 3st exon	igf2bp2b 1s	TTAATACGACTCACTATAGGAAGTTCCTTTGAAGATCTGTTTTAGAGCTAGAAATAG
igf2bp2b 2s	TGTTGGCAGACTCATAGGGA-AGG Forward 3st exon	igf2bp2b 2s	TTAATACGACTCACTATAGTGTTGGCAGACTCATAGGGAGTTTTAGAGCTAGAAATAG
igf2bp2b 3s	GTACCATCTCGGTGAGAGGA-GGG Forward 4st exon	igf2bp2b 3s	TTAATACGACTCACTATAGTACCATCTCGGTGAGAGGAGTTTTAGAGCTAGAAATAG
igf2bp2b 4s	GGAGTGCTGTAAAGCAGAAG-GGG Forward 4st exon	igf2bp2b 4s	TTAATACGACTCACTATAGGAGTGCTGTAAAGCAGAAGGTTTTAGAGCTAGAAATAG
lgals8a 1s	CATGAAGCCTCGGGCAGATG-TGG Forward 3st exon	lgals8a 1s	TTAATACGACTCACTATAGCATGAAGCCTCGGGCAGATGGTTTTAGAGCTAGAAATAG
lgals8a 2s	TAGGGAGATCGCGTGAAGCG-AGG Reverse 3st exon	lgals8a 2s	TTAATACGACTCACTATAGTAGGGAGATCGCGTGAAGCGGTTTTAGAGCTAGAAATAG
lgals8a 3s	GGTAAACGGCTCTCACCTGC-TGG Forward 4st exon	lgals8a 3s	TTAATACGACTCACTATAGGTAAACGGCTCTCACCTGCGTTTTAGAGCTAGAAATAG
lgals8a 4s	CACACTGAATATATCCGGGA-AGG Forward 4st exon	lgals8a 4s	TTAATACGACTCACTATAGCACACTGAATATATCCGGGAGTTTTAGAGCTAGAAATAG
lgals8b 1s	GTGGCTGCAGTACAAAGCCA-CGG Forward 2st exon	lgals8b 1s	TTAATACGACTCACTATAGTGGCTGCAGTACAAAGCCAGTTTTAGAGCTAGAAATAG
lgals8b 2s	TGAAATGCCACATCCGCCCG-TGG Reverse 2st exon	lgals8b 2s	TTAATACGACTCACTATAGTGAAATGCCACATCCGCCCGGTTTTAGAGCTAGAAATAG
lgals8b 3s	CGTGGAGAACTGCTGAATCG-TGG Reverse 2st exon	lgals8b 3s	TTAATACGACTCACTATAGCGTGGAGAACTGCTGAATCGGTTTTAGAGCTAGAAATAG
lgals8b 4s	AACGTAGAAGTGCATGCCAT-TGG Forward 3st exon	lgals8b 4s	TTAATACGACTCACTATAGAACGTAGAAGTGCATGCCATGTTTTAGAGCTAGAAATAG
Negative control	CGAAATATTCCAGAGCTGAG	T7gRNA-R	AAAAAAAGCACCGACTCGGTGCCAC
