# Supplementary material for: Insulin like growth factor 2 mRNA binding protein 2 regulates vascular development in cerebral arteriovenous malformations
Source: Front Neurol. 2024 Dec 11;15:1483016. doi: 10.3389/fneur.2024.1483016 (PMC11668662; doi:10.3389/fneur.2024.1483016)
Supplement: Supplementary file 6 [file Table_4.XLSX]

## Sheet: ALL
gene_id	shNC1_fpkm	shNC2_fpkm	shNC3_fpkm	shNC4_fpkm	shNC5_fpkm	shIGF1_fpkm	shIGF2_fpkm	shIGF3_fpkm	shIGF4_fpkm	shIGF5_fpkm	log2FoldChange	pvalue	gene_name
ENSG00000119630	39.2459	37.69	40.6761	37.779	40.7905	95.6384	101.704	111.505	109.795	105.117	1.41656	6.07816e-128	PGF
ENSG00000163083	16.7439	16.6746	16.2154	17.0028	14.0152	3.7841	3.40333	3.89696	3.21977	3.92123	-2.14374	1.3048e-114	INHBB
ENSG00000101335	15.3349	13.2021	15.0684	15.2546	9.70612	67.7965	70.834	74.8158	73.9907	64.8271	2.36272	1.46733e-98	MYL9
ENSG00000265107	12.7814	9.92165	9.77737	9.75876	15.7729	0.884628	0.6706	0.866373	0.59598	1.15423	-3.7949	4.27877e-91	GJA5
ENSG00000166128	11.0754	10.4915	11.0565	10.7743	11.3258	3.73739	3.75655	3.41277	3.63913	4.29001	-1.53844	1.10946e-88	RAB8B
ENSG00000197930	6.47165	6.29777	6.48919	7.09894	6.81985	15.866	15.7051	16.7687	15.8894	17.9928	1.30901	1.84785e-88	ERO1L
ENSG00000149591	1.6113	1.80744	1.23557	1.39991	1.22012	17.4641	17.9156	22.2647	21.1987	10.3577	3.61881	6.65047e-87	TAGLN
ENSG00000196730	31.0675	31.2731	32.9749	30.4538	28.4885	10.6361	10.3347	10.638	9.52855	12.5297	-1.52295	2.01287e-86	DAPK1
ENSG00000104723	4.0156	3.95479	4.02215	4.12281	3.63545	12.2071	13.8822	13.3232	13.6578	11.0173	1.69898	4.08946e-86	TUSC3
ENSG00000008517	13.6447	11.5688	13.9733	14.3945	14.2881	44.5605	49.3653	54.6502	51.7713	41.1756	1.83089	1.51282e-85	IL32
ENSG00000116667	5.44723	5.20591	5.32023	5.31323	5.25017	2.17773	2.16467	1.88332	2.14021	2.08364	-1.34419	5.33494e-85	C1orf21
ENSG00000272405	0.693764	0.830919	0.796288	0.721448	0.525339	6.10558	6.22881	6.96354	6.89463	4.77429	3.12439	6.3166e-80	RP11-284F21.10
ENSG00000162430	140.972	138.357	135.723	114.637	113.907	37.4897	33.8495	39.1056	34.5565	44.5753	-1.76318	9.50244e-79	SEPN1
ENSG00000110880	39.4144	35.5669	37.1445	35.7963	39.9595	15.0583	14.7273	15.6898	14.9406	17.6765	-1.26648	1.17182e-75	CORO1C
ENSG00000121966	31.808	27.4998	32.1701	31.2485	34.8977	74.3174	78.5985	87.518	85.0306	83.9926	1.3766	8.19927e-73	CXCR4
ENSG00000221866	5.34484	5.29455	5.69851	4.36863	3.24755	0.896643	0.743668	0.851674	0.761542	0.875941	-2.53496	1.2171e-72	PLXNA4
ENSG00000162337	42.4501	48.0081	43.2879	45.3209	44.13	18.4064	18.7104	18.138	18.0298	21.7941	-1.23106	1.21719e-71	LRP5
ENSG00000101265	24.9781	22.7789	27.2363	22.9138	19.9515	61.7339	61.5656	66.5275	63.0694	60.7857	1.4127	1.49464e-69	RASSF2
ENSG00000140682	13.2511	13.5438	12.7024	13.1053	11.0016	28.8088	29.6785	31.6489	30.4791	28.4935	1.23021	1.89935e-69	TGFB1I1
ENSG00000157483	11.1403	9.81327	11.1933	9.96215	10.0978	24.9387	22.8771	26.0731	25.9871	22.1695	1.22545	1.6467e-65	MYO1E
ENSG00000171388	384.833	368.391	375.534	328.028	266.319	1148.81	1153.41	1230.34	1211.17	970.118	1.72952	9.3202e-64	APLN
ENSG00000108797	0.750432	1.15149	0.694511	0.946544	0.732959	3.99167	4.3713	4.46648	4.73229	3.74103	2.31835	2.07126e-62	CNTNAP1
ENSG00000108691	29.4895	26.2673	33.0782	28.7267	28.4603	106.947	110.378	142.48	117.784	177.767	2.16621	7.22962e-61	CCL2
ENSG00000112096	2.57298	2.51011	2.39874	2.5775	2.76648	5.44081	5.55687	6.07927	5.8072	6.56923	1.19884	1.41188e-60	SOD2
ENSG00000167244	2.11015	2.17379	2.16396	2.00697	2.1186	5.6716	4.91738	5.86667	5.3595	5.90115	1.39077	5.27668e-60	IGF2
ENSG00000007908	0.444509	0.506054	0.546855	0.415984	0.369169	6.35157	4.7565	8.66723	6.00454	3.43522	3.68092	6.55056e-60	SELE
ENSG00000100292	14.2423	13.3088	14.3047	14.721	14.0139	170.81	186.701	205.609	231.762	90.5146	3.64877	1.4794e-59	HMOX1
ENSG00000184702	9.01567	9.08402	8.97228	9.67511	9.37756	3.06509	3.30302	3.7938	3.25328	4.04151	-1.4019	2.25627e-59	SEPT5
ENSG00000173674	18.712	17.242	17.3863	19.4278	21.8611	5.65193	5.90849	5.39739	5.9758	7.4202	-1.64062	2.93222e-59	EIF1AX
ENSG00000178695	218.525	209.886	212.22	220.075	187.226	94.2233	96.8804	77.8378	87.9237	78.6429	-1.26676	2.97558e-58	KCTD12
ENSG00000133574	78.1857	76.9648	75.9917	82.3784	79.7263	26.4235	27.2104	26.1266	23.4052	34.8768	-1.51016	1.16079e-57	GIMAP4
ENSG00000086696	0.853644	0.691498	0.903652	0.755175	0.490016	2.99963	3.34837	3.25196	3.34671	3.08034	2.12385	7.45751e-57	HSD17B2
ENSG00000139289	8.65293	9.26065	8.78733	9.31454	10.6428	21.0286	21.0334	22.8966	21.7187	19.3147	1.18272	8.15325e-57	PHLDA1
ENSG00000034677	9.79263	9.2747	9.29258	10.2474	10.5345	20.6427	19.044	18.6923	20.5175	19.5033	1.00122	7.9436e-56	RNF19A
ENSG00000091986	7.6712	8.411	8.51842	7.15682	6.69098	2.73356	2.83731	2.77176	2.51725	2.7726	-1.4952	7.14952e-55	CCDC80
ENSG00000054598	16.5952	15.5326	15.0899	15.7281	15.039	7.29661	6.81583	6.89334	7.18976	8.0549	-1.10384	1.99007e-53	FOXC1
ENSG00000128567	79.842	81.1483	89.3142	73.1724	70.7717	37.515	34.2467	37.7846	35.8706	38.0251	-1.10363	6.81146e-53	PODXL
ENSG00000065809	36.0802	34.5062	34.7916	39.3077	32.2575	14.9195	16.7649	14.1768	14.968	17.3057	-1.17916	8.72533e-53	FAM107B
ENSG00000159176	26.0734	25.7107	25.962	25.7924	20.6265	54.7381	56.0634	60.149	59.9033	52.0615	1.18839	2.18292e-52	CSRP1
ENSG00000120156	31.0319	30.6693	31.2119	30.3037	32.5432	16.2033	17.0829	17.1344	17.8211	18.4559	-0.845583	2.98795e-52	TEK
ENSG00000135324	9.58835	9.83734	7.58328	9.63388	9.2954	1.8219	2.67217	1.76628	1.91073	2.41956	-2.11917	6.34046e-52	MRAP2
ENSG00000145990	8.05346	8.23426	7.97765	7.72504	9.32685	3.8209	3.70609	3.78999	3.82009	4.1752	-1.09771	5.35221e-51	GFOD1
ENSG00000119335	64.2045	64.2068	67.8565	68.6492	65.3874	41.7051	41.2905	41.2297	41.781	42.5413	-0.663412	1.16582e-50	SET
ENSG00000138772	3.76012	3.98328	3.88126	4.38614	2.30308	15.6731	16.6884	15.9471	17.5302	13.1113	2.11023	1.7042e-50	ANXA3
ENSG00000166200	8.25525	8.8805	8.18358	9.49992	8.1006	4.09143	3.99068	3.7471	3.96927	4.17005	-1.10336	1.79477e-50	COPS2
ENSG00000164116	2.29182	1.98106	2.49784	2.41884	1.88221	0.371067	0.255245	0.296785	0.428075	0.446411	-2.61676	4.10875e-50	GUCY1A3
ENSG00000073910	4.56419	4.67193	4.31352	4.79031	4.81594	1.51061	1.62422	1.40486	1.63951	2.12236	-1.47982	1.44174e-48	FRY
ENSG00000099998	16.728	18.2386	16.2097	16.5231	15.7808	6.67756	6.58643	6.99872	7.30636	8.06892	-1.22702	4.66684e-48	GGT5
ENSG00000168077	50.9188	58.6082	56.2559	39.5232	50.2776	17.501	18.9025	18.6634	17.1294	20.1904	-1.46807	5.6581e-48	SCARA3
ENSG00000139433	20.5573	20.4786	19.1843	21.0909	18.1518	7.18658	6.67485	7.71092	6.22093	8.91101	-1.43689	8.31434e-48	GLTP
ENSG00000198162	11.6908	11.7794	12.1421	11.7023	9.81046	4.22981	3.79226	3.783	3.69247	5.15418	-1.46703	9.85664e-48	MAN1A2
ENSG00000138185	8.41917	7.33323	8.93817	7.1873	6.7609	2.95798	2.75166	3.13272	2.93733	3.39894	-1.34732	4.1461e-47	ENTPD1
ENSG00000110848	0.0696444	0.0840308	0.102948	0.105231	0.0351579	2.83312	3.44881	5.32643	4.46958	2.89983	5.59982	5.03978e-47	CD69
ENSG00000090339	2.96258	3.49963	3.61881	2.92706	1.82692	18.298	15.6684	26.7475	18.2729	13.9241	2.64898	1.32255e-46	ICAM1
ENSG00000124762	75.8539	73.3237	70.6411	66.1297	43.1403	262.575	273.358	305.512	296.629	198.607	2.02234	1.05367e-44	CDKN1A
ENSG00000131507	16.1851	14.7944	15.9036	16.4046	13.5946	5.23883	5.53036	5.46053	5.13752	7.26397	-1.42447	1.20407e-44	NDFIP1
ENSG00000168785	13.901	13.0838	14.5657	13.3244	12.7441	6.91913	7.20295	6.38065	7.0274	7.52258	-0.947537	1.72763e-44	TSPAN5
ENSG00000139636	7.64317	8.05778	8.00352	7.03759	8.241	15.7157	15.8753	16.2983	17.646	14.4625	1.03635	1.73301e-44	LMBR1L
ENSG00000085365	12.4124	11.3837	12.4934	12.5952	10.5105	5.75004	5.69925	5.57337	5.92484	5.7133	-1.0502	8.39452e-44	SCAMP1
ENSG00000181885	3.13948	2.96036	2.66747	3.34847	3.63588	10.136	10.55	9.96989	11.962	8.46001	1.69433	1.66074e-43	CLDN7
ENSG00000176641	6.66595	6.0266	5.74215	5.80779	5.40352	2.98504	2.57346	2.85544	2.63705	2.73804	-1.10259	2.92461e-43	RNF152
ENSG00000067704	27.2764	23.5404	24.668	27.1754	20.8816	11.1588	11.5645	10.6673	10.5001	11.2566	-1.16295	3.78514e-43	IARS2
ENSG00000008441	5.81079	6.36287	6.08822	5.63681	5.64035	2.53687	2.65382	2.68525	2.12906	2.67433	-1.21995	4.19741e-43	NFIX
ENSG00000064666	62.2271	61.0117	60.7895	61.4832	49.3192	118.115	122.618	130.516	133.993	114.165	1.07132	1.7209e-42	CNN2
ENSG00000137693	9.82615	9.72349	9.53001	9.66556	13.1733	3.17175	2.38009	2.68781	2.46281	3.7671	-1.84274	2.3416e-42	YAP1
ENSG00000176435	657.269	680.78	693.547	753.092	619.429	234.322	252.422	239.401	242.799	337.924	-1.38114	2.48819e-42	CLEC14A
ENSG00000152217	3.17785	3.56397	3.13747	3.27117	2.95996	0.78348	0.665915	0.630901	0.788916	1.20362	-1.98197	6.56076e-42	SETBP1
ENSG00000087502	4.59285	4.66678	4.69402	4.75717	4.97323	2.14227	1.67645	1.77325	1.83589	2.16699	-1.302	1.59792e-41	ERGIC2
ENSG00000137573	2.57972	2.56221	2.93906	2.87746	2.40342	0.625672	0.490847	0.566134	0.673003	0.958	-2.00886	2.08769e-41	SULF1
ENSG00000235162	2.49013	2.12083	2.18689	2.4567	1.99652	8.03322	10.011	10.8497	11.8917	6.91828	2.08611	3.81172e-41	C12orf75
ENSG00000117724	2.53642	2.55991	2.60874	2.87051	1.84825	0.742271	0.801167	0.813259	0.768782	0.781146	-1.66794	5.42724e-41	CENPF
ENSG00000071073	6.78607	6.22739	6.7998	6.82058	6.71018	3.69062	3.56369	3.05382	3.25976	3.0993	-1.00035	1.27048e-40	MGAT4A
ENSG00000137509	61.9206	61.3478	63.3116	65.1381	52.3104	33.5855	32.6334	33.2349	32.9725	33.8765	-0.87015	2.03017e-40	PRCP
ENSG00000104856	4.42781	4.24254	4.31213	4.38805	3.79663	10.9682	10.6453	14.0403	11.0114	10.157	1.42644	5.41768e-40	RELB
ENSG00000101972	11.2505	10.4715	10.6834	11.9759	11.2981	5.92365	5.09881	4.82298	4.85472	5.86884	-1.06676	9.61294e-40	STAG2
ENSG00000104689	5.03498	4.33452	5.07816	4.26166	4.33561	11.2783	10.4733	11.7482	10.3159	9.96857	1.22473	2.58598e-39	TNFRSF10A
ENSG00000138685	8.588	7.99983	7.91811	7.9353	10.3609	2.25449	2.18219	1.93648	1.89634	3.33793	-1.88235	3.01966e-39	FGF2
ENSG00000018408	64.7128	61.6648	63.7022	69.9745	49.4877	25.5094	25.7714	23.4068	24.3588	29.94	-1.26277	4.42506e-39	WWTR1
ENSG00000115364	7.5018	7.33166	7.80677	8.20007	7.85544	3.72019	3.88212	3.76065	4.03037	3.98272	-0.998556	2.12523e-38	MRPL19
ENSG00000163739	2.33352	3.2134	3.23944	3.54121	1.69018	11.0977	13.0078	16.4319	14.8944	15.6525	2.34714	2.42009e-38	CXCL1
ENSG00000159335	172.763	168.72	178.251	179.293	169.973	250.584	273.259	277.067	268.518	273.522	0.627963	2.65538e-38	PTMS
ENSG00000140406	15.1979	15.3002	14.5143	15.5619	13.1626	27.8579	29.0096	29.3811	30.0705	25.0836	0.940006	5.58524e-38	MESDC1
ENSG00000159692	17.9045	18.522	18.5231	18.1852	17.8568	10.6696	10.0014	10.2791	11.1046	11.7793	-0.756885	1.02755e-37	CTBP1
ENSG00000172572	10.6625	10.088	10.4219	10.7594	9.17658	5.30066	5.15392	4.21879	4.28057	4.98431	-1.09355	1.14603e-37	PDE3A
ENSG00000136770	9.12166	9.94338	10.7247	9.34197	8.45982	3.61205	3.34353	4.13072	3.46686	3.82271	-1.37152	1.2389e-37	DNAJC1
ENSG00000171608	2.93835	2.60262	3.15861	2.71092	2.62598	7.45253	7.58565	8.64819	8.27597	5.84597	1.43008	3.16124e-37	PIK3CD
ENSG00000130402	111.22	102.138	115.539	100.165	94.6443	185.188	176.514	196.563	188.342	194.692	0.846005	3.18787e-37	ACTN4
ENSG00000166483	2.55463	2.59509	2.56869	2.90304	2.51639	5.11407	5.22783	4.76774	5.12397	4.83574	0.932564	4.08146e-37	WEE1
ENSG00000073921	24.6837	22.3369	23.8618	22.8887	20.6201	40.4097	39.2921	42.4308	40.2108	37.6562	0.806628	9.37628e-37	PICALM
ENSG00000111832	6.01924	5.78929	5.84185	6.42527	6.21768	2.51449	2.2869	2.27391	2.30279	3.1426	-1.27365	1.44426e-36	RWDD1
ENSG00000120889	71.2379	76.403	78.1951	70.5803	59.2712	135.181	134.223	146.556	139.266	136.64	0.96005	1.54656e-36	TNFRSF10B
ENSG00000130300	56.8738	51.5441	55.3502	52.4917	61.5329	23.7215	23.6245	24.4171	24.6567	31.0285	-1.1241	1.98411e-36	PLVAP
ENSG00000106070	42.0885	43.4597	42.9467	39.7631	44.8823	26.0047	24.5282	24.4367	23.5616	27.5121	-0.757875	2.66548e-36	GRB10
ENSG00000105499	2.31641	2.59099	2.04565	2.31633	1.56585	5.92258	6.48439	7.03477	5.79968	6.00533	1.53125	2.69907e-36	PLA2G4C
ENSG00000110768	6.85014	7.03911	6.00831	6.92315	6.17721	3.19475	3.1429	2.62142	2.94602	3.3297	-1.11392	3.77659e-36	GTF2H1
ENSG00000196923	30.7314	33.0611	30.6832	29.3347	22.48	71.8126	74.5936	85.4271	81.499	62.8156	1.36283	4.96443e-36	PDLIM7
ENSG00000187513	23.9314	22.8689	22.1422	21.4181	42.6509	2.35376	1.48055	2.17788	1.54813	3.3195	-3.61046	1.05358e-35	GJA4
ENSG00000198467	22.8732	22.5509	24.5228	24.1386	30.8272	55.1444	57.591	63.1608	65.2753	51.5335	1.22781	1.06741e-35	TPM2
ENSG00000106003	0.480868	0.957331	0.835924	0.837019	1.12151	3.59934	4.9126	4.48741	4.42543	3.4247	2.28746	1.26356e-35	LFNG
ENSG00000113389	0.879612	0.922618	0.809697	0.942431	1.36241	0.132527	0.122051	0.134906	0.166787	0.20499	-2.69226	1.37914e-35	NPR3
ENSG00000144645	3.27734	3.06013	2.97003	3.02094	2.9348	5.76162	5.78147	6.10197	6.22534	5.10716	0.92568	1.39051e-35	OSBPL10
ENSG00000149798	8.48409	8.39975	8.46858	9.16552	7.58841	17.6641	15.9724	18.1249	16.5337	18.7936	1.05067	1.57226e-35	CDC42EP2
ENSG00000119900	2.67307	2.66871	2.80888	3.04236	2.71717	5.33849	5.32164	4.83175	5.601	5.45757	0.93267	2.22452e-35	OGFRL1
ENSG00000104408	54.6975	52.1425	52.1148	58.501	55.0479	30.9782	30.4798	26.323	29.1836	33.0566	-0.861034	3.38793e-35	EIF3E
ENSG00000162645	8.0871	7.94388	8.26894	8.11987	6.97255	17.6139	17.3106	17.9455	18.0207	13.6907	1.10307	5.06071e-35	GBP2
ENSG00000100731	4.53111	4.27473	4.61177	4.15775	4.00592	2.06583	2.04514	1.85798	1.73416	2.36491	-1.09924	5.37773e-35	PCNX
ENSG00000163110	14.1685	13.0951	13.5338	12.8503	8.98259	32.4923	30.5955	30.3527	31.2337	29.2559	1.29789	5.99755e-35	PDLIM5
ENSG00000066279	1.59282	1.50665	1.68458	1.79277	1.21978	0.554226	0.470936	0.417202	0.422391	0.476257	-1.73232	1.60192e-34	ASPM
ENSG00000253368	7.88533	8.18943	7.96746	7.23919	6.34891	26.4078	23.9016	25.6278	27.8972	16.2519	1.67547	3.90644e-34	TRNP1
ENSG00000121064	13.4458	13.0012	14.6494	13.4891	12.882	5.8615	6.80607	7.05684	6.42255	7.50764	-1.00355	5.75725e-34	SCPEP1
ENSG00000172466	10.0961	8.48779	10.1197	10.0336	9.22476	5.13206	5.39587	4.6516	4.94387	5.23272	-0.919303	6.65179e-34	ZNF24
ENSG00000180801	5.65317	5.98017	6.01206	5.69452	4.36002	12.1491	11.7177	12.2244	11.3754	11.7351	1.09797	7.43568e-34	ARSJ
ENSG00000182307	10.2567	10.7082	10.8576	10.1455	10.2131	5.31339	5.80253	5.68506	5.20852	5.60608	-0.91856	7.56672e-34	C8orf33
ENSG00000064042	7.25112	7.7722	7.24714	7.79741	6.55867	4.1037	3.28267	3.06922	3.40277	3.13144	-1.10727	8.66844e-34	LIMCH1
ENSG00000120802	6.62569	6.57042	6.46004	6.46453	7.16077	3.29912	3.37874	3.32647	3.18177	3.98683	-0.954847	8.67564e-34	TMPO
ENSG00000113555	6.48767	7.01364	6.44659	5.20868	6.81057	13.6294	14.0171	15.1387	14.5602	12.0685	1.11816	1.56394e-33	PCDH12
ENSG00000183496	5.87541	6.44834	5.97263	6.24162	7.4721	12.4476	12.5394	12.2868	13.6759	13.9452	1.01729	4.7702e-33	MEX3B
ENSG00000104695	18.4014	18.6149	18.9159	20.0743	17.594	28.5187	29.9972	30.076	29.2621	29.503	0.655062	5.19406e-33	PPP2CB
ENSG00000111799	1.93257	2.09193	2.33987	1.9048	1.32783	5.41248	4.91885	5.54861	5.01346	5.74325	1.47467	6.43722e-33	COL12A1
ENSG00000163171	9.47689	8.65021	9.24016	9.1529	8.05646	19.0589	17.6726	19.07	19.3468	14.8061	1.01335	6.50515e-33	CDC42EP3
ENSG00000166925	23.9794	26.1677	24.8308	24.3063	25.1129	37.6113	39.3101	38.2498	41.7896	38.5532	0.651943	7.89467e-33	TSC22D4
ENSG00000162804	10.8494	14.0462	12.2995	10.6252	10.0908	5.6363	4.46902	4.69102	4.27454	5.14473	-1.25746	1.16818e-32	SNED1
ENSG00000070882	3.81479	3.80466	3.96652	4.29728	4.02571	7.52812	7.11921	7.24566	7.42281	6.51447	0.847308	1.36705e-32	OSBPL3
ENSG00000173269	154.513	153.731	157.734	155.924	153.513	107.166	108.072	111.17	111.189	116.425	-0.485	2.1383e-32	MMRN2
ENSG00000108518	168.083	152.133	161.313	170.319	163.782	252.357	288.901	287.267	297.717	258.252	0.763334	2.25141e-32	PFN1
ENSG00000029153	3.39878	3.36532	3.26496	3.29466	3.74286	8.38337	7.52991	7.86918	7.77633	6.04697	1.13883	2.48873e-32	ARNTL2
ENSG00000092621	2.08155	1.7355	1.75283	1.84469	2.33775	4.78886	4.36701	4.7349	5.4711	4.67657	1.29928	3.63466e-32	PHGDH
ENSG00000101608	85.1739	71.4475	78.5792	86.9152	85.5295	138.188	154.658	150.354	158.818	137.284	0.858769	4.48499e-32	MYL12A
ENSG00000128052	103.128	100.177	103.438	97.6745	98.4774	161.718	164.694	159.285	159.421	141.215	0.644908	5.71681e-32	KDR
ENSG00000154114	6.51824	6.02565	6.46227	5.96876	5.87191	2.86157	3.02087	2.88009	2.93907	3.6143	-1.00924	7.10804e-32	TBCEL
ENSG00000133026	112.884	121.648	126.197	112.28	76.4957	40.5495	38.2854	36.9265	35.5673	48.3296	-1.46053	1.5485e-31	MYH10
ENSG00000126777	10.9119	10.1046	10.7894	11.127	9.24572	4.72755	4.56768	4.3239	4.38973	5.99782	-1.11964	2.0483e-31	KTN1
ENSG00000108551	0.865057	1.02106	0.767236	1.05703	0.96833	3.43403	5.05175	4.24225	4.41721	4.90848	2.23369	2.96592e-31	RASD1
ENSG00000102010	50.1869	48.7442	46.2157	51.2974	56.7206	16.4361	16.2833	14.9076	15.608	25.4448	-1.51326	3.80674e-31	BMX
ENSG00000144827	8.18268	8.33031	7.77852	9.33203	8.66804	4.05267	4.11881	3.75539	4.18995	4.0979	-1.06545	3.84566e-31	ABHD10
ENSG00000116678	5.56832	5.64066	5.50278	5.81873	5.83216	2.8122	2.94772	2.36351	2.51598	3.27721	-1.02718	4.3366e-31	LEPR
ENSG00000115461	0.0510279	0.101588	0.108618	0.046261	0.100464	1.19013	0.944996	2.08577	1.57191	0.713512	3.98117	4.8914e-31	IGFBP5
ENSG00000138398	7.95035	7.87275	8.38087	8.55049	7.62159	4.98498	4.70316	4.38705	4.31205	4.5665	-0.814076	8.43575e-31	PPIG
ENSG00000100311	109.708	111.806	113.209	102.898	82.9814	198.335	198.469	219.226	200.435	206.101	0.974128	1.24228e-30	PDGFB
ENSG00000117228	3.5032	3.44425	3.63269	3.80875	3.61011	7.22667	6.84787	6.62748	7.36599	6.27346	0.931729	3.0343e-30	GBP1
ENSG00000131196	8.01141	7.91238	7.87712	7.7494	7.51585	4.56165	4.74361	4.48021	4.48775	5.17024	-0.736198	3.85931e-30	NFATC1
ENSG00000100697	7.53488	7.49116	8.07252	7.4467	6.66534	4.59256	4.02669	4.02634	4.13382	4.32202	-0.81736	6.23423e-30	DICER1
ENSG00000204217	27.6952	25.3273	27.2502	24.7121	20.1763	12.6381	12.1217	11.1487	11.3615	13.4548	-1.04312	7.04594e-30	BMPR2
ENSG00000111145	92.6333	91.3015	87.1388	93.905	88.203	53.1159	54.0591	47.3577	50.408	60.1915	-0.773277	1.3123e-29	ELK3
ENSG00000164684	6.825	6.26334	6.58163	6.04843	4.62077	2.776	2.65664	2.21712	2.33624	2.77273	-1.24884	2.05219e-29	ZNF704
ENSG00000009307	100.164	92.6077	97.153	100.916	82.8864	57.5811	59.4181	54.4072	54.2526	57.6372	-0.741601	3.33528e-29	CSDE1
ENSG00000135596	3.73957	4.01854	3.36852	3.505	3.2373	6.62025	6.26265	7.14445	6.77797	6.71776	0.909697	4.00893e-29	MICAL1
ENSG00000028277	0.83445	0.968954	0.772838	0.964033	0.492076	3.45127	2.75014	3.63066	3.10652	2.33359	1.92571	4.80476e-29	POU2F2
ENSG00000184792	5.56374	5.50539	4.88237	4.92834	5.75112	2.78535	2.59602	2.56358	2.95664	2.78073	-0.960766	8.1242e-29	OSBP2
ENSG00000174738	9.53406	8.59695	9.30755	10.0157	9.67443	5.76965	5.28742	4.85696	5.2306	4.8439	-0.858569	9.56046e-29	NR1D2
ENSG00000128849	12.4765	12.6844	14.0744	13.3681	15.4758	8.05423	7.28203	7.27959	7.50294	7.9729	-0.838144	1.2212e-28	CGNL1
ENSG00000239887	3.87592	3.24271	3.63221	3.35472	2.95711	1.22964	1.07155	1.45231	1.36575	1.14528	-1.44269	1.43218e-28	C1orf226
ENSG00000135916	1.58632	1.45829	1.29528	1.27834	1.48721	3.96065	4.86806	4.32081	4.26614	3.68514	1.56962	1.92812e-28	ITM2C
ENSG00000140873	14.7772	15.7064	15.5947	14.798	11.3388	6.79941	6.66169	6.39684	6.74782	7.7181	-1.07233	2.42228e-28	ADAMTS18
ENSG00000147475	5.14062	5.23022	5.21857	5.34056	4.62381	2.82593	2.77797	2.47787	2.98256	2.93349	-0.86726	2.43709e-28	ERLIN2
ENSG00000100097	254.542	243.822	244.753	259.182	239.858	496.335	592.703	569.67	596.842	402.68	1.09761	2.99711e-28	LGALS1
ENSG00000167693	32.8051	31.2039	31.9416	31.4941	30.2342	12.6648	12.7424	12.8808	11.9044	18.563	-1.19721	3.0087e-28	NXN
ENSG00000091136	207.975	218.059	211.248	212.058	203.941	151.626	146.673	138.743	141.359	154.013	-0.524125	3.36025e-28	LAMB1
ENSG00000113387	8.83501	8.83091	9.85591	10.9246	10.8334	4.72962	5.26627	4.84663	4.87362	5.61985	-0.960492	4.45788e-28	SUB1
ENSG00000182809	46.1855	46.1609	46.4238	50.0653	47.8177	66.129	71.1018	70.9536	74.3978	68.8247	0.570201	5.67703e-28	CRIP2
ENSG00000117054	5.36071	6.1571	6.53442	6.76652	6.7863	2.73367	2.69939	2.72973	2.56703	3.40833	-1.16124	9.92351e-28	ACADM
ENSG00000235505	17.4626	17.9711	19.8473	18.9312	17.1185	7.93446	7.82826	7.54909	6.46558	10.359	-1.18577	1.40981e-27	RP11-693N9.2
ENSG00000184009	1171.8	1131.28	1096.37	1153.64	803.596	2214	2307.51	2419.49	2439.82	2024.25	1.09028	1.68312e-27	ACTG1
ENSG00000061938	4.05046	4.58698	4.48022	4.40544	5.24849	8.20177	7.56793	8.06206	8.18496	8.08321	0.814771	1.78638e-27	TNK2
ENSG00000170017	9.13039	10.0109	11.4443	8.98316	8.43942	4.28835	3.90445	3.93752	4.48728	5.15625	-1.14001	1.84466e-27	ALCAM
ENSG00000148773	4.81519	4.99846	5.1312	3.98375	2.86876	1.09983	1.0447	1.064	1.12672	1.72751	-1.84501	2.02515e-27	MKI67
ENSG00000062725	5.97131	5.53613	6.0341	6.17391	5.63064	3.26169	2.90593	2.92	3.04398	3.68609	-0.890514	2.64968e-27	APPBP2
ENSG00000147862	29.6331	27.6136	28.5117	27.0009	23.5281	13.1652	10.9248	11.0134	10.7749	15.441	-1.15191	2.72628e-27	NFIB
ENSG00000148175	69.2803	69.0187	70.9092	67.915	71.5619	38.9713	39.7033	37.4969	37.265	47.6221	-0.794271	2.99959e-27	STOM
ENSG00000151893	5.3206	5.2991	5.60727	5.65471	4.41816	2.94624	2.45891	2.71789	2.56605	2.86027	-0.955371	3.70491e-27	CACUL1
ENSG00000136928	2.61576	2.70381	2.65972	2.86752	2.55258	0.880556	1.28071	1.15006	0.969304	1.18348	-1.29627	5.28983e-27	GABBR2
ENSG00000006327	21.2744	20.5717	26.1259	19.3515	19.8272	40.8438	46.4807	46.0603	49.145	39.5639	1.05157	5.97881e-27	TNFRSF12A
ENSG00000120278	13.7478	13.5747	13.9588	13.0597	11.7225	22.5101	21.1779	21.2637	21.3188	20.2298	0.689743	5.98679e-27	PLEKHG1
ENSG00000161011	43.1281	41.6783	41.6108	42.0194	45.6729	60.178	59.4945	64.0921	62.9502	61.1098	0.523587	6.69381e-27	SQSTM1
ENSG00000148358	19.8621	18.8526	20.4745	19.311	14.746	9.22151	7.76651	8.61341	8.39332	10.173	-1.07746	7.13412e-27	GPR107
ENSG00000041802	14.7781	15.0525	15.7696	14.3131	15.4889	8.85691	8.7336	8.60326	8.60407	10.1634	-0.745914	9.00275e-27	LSG1
ENSG00000131747	5.16803	5.14806	5.41702	5.96305	4.06033	1.67117	2.08892	1.8117	1.89759	2.47543	-1.37225	1.14892e-26	TOP2A
ENSG00000164062	8.82881	8.25701	9.25416	8.24659	7.79434	13.7475	14.1704	14.6199	14.8836	13.533	0.744447	1.17003e-26	APEH
ENSG00000159023	8.82991	8.8232	9.23869	8.06258	8.54857	3.80104	3.51964	3.64816	3.93314	5.22857	-1.11113	1.21674e-26	EPB41
ENSG00000115762	15.1853	14.2102	15.2015	14.3071	11.6985	26.704	27.9004	28.5813	27.1669	23.2555	0.920824	1.3735e-26	PLEKHB2
ENSG00000152207	1.83575	1.4065	2.44225	2.06368	0.834051	0.132761	0.0871709	0.235964	0.17672	0.228168	-3.31272	1.43673e-26	CYSLTR2
ENSG00000023445	0.148664	0.0395676	0.193901	0.055496	0.145682	0.956549	0.765254	1.39102	0.959693	1.0842	3.14002	1.67552e-26	BIRC3
ENSG00000100345	355.191	361.472	376.642	329.195	276.63	645.977	590.578	651.585	621.427	599.8	0.871849	2.23452e-26	MYH9
ENSG00000198830	35.2698	37.0858	32.4435	34.6118	36.4299	8.43284	12.185	12.0495	10.7458	17.5382	-1.52869	3.34137e-26	HMGN2
ENSG00000125744	2.57861	2.46207	2.6832	2.46657	2.64446	4.90071	5.51625	5.55896	5.49236	5.46993	1.06808	3.56686e-26	RTN2
ENSG00000184584	15.625	15.3139	15.4029	14.3975	11.5601	25.2087	27.9753	28.0683	28.4555	27.1727	0.922061	4.78722e-26	TMEM173
ENSG00000168067	19.0123	18.1579	18.544	16.7747	16.0185	34.3106	31.4748	36.471	35.2189	28.0164	0.903532	5.74489e-26	MAP4K2
ENSG00000073712	11.0784	10.5005	11.2509	11.6544	11.5187	16.7892	16.7047	16.735	16.7185	18.5874	0.610848	6.34336e-26	FERMT2
ENSG00000162407	10.2982	10.6697	13.171	10.7795	11.5088	6.27381	5.97344	6.27086	6.40555	5.8086	-0.877143	7.18762e-26	PPAP2B
ENSG00000146676	7.06086	7.1243	8.26846	7.09133	7.25152	4.45629	4.02019	3.41745	3.97084	4.08167	-0.883137	7.48633e-26	PURB
ENSG00000138759	1.67111	1.66112	1.85125	1.36876	1.46085	3.25758	2.91172	3.09762	3.44412	2.97423	0.969902	7.80506e-26	FRAS1
ENSG00000178904	6.59212	6.37374	6.4849	6.015	5.88758	3.76518	3.95266	3.97411	3.65728	4.0645	-0.690887	8.44805e-26	DPY19L3
ENSG00000143862	22.3031	20.5141	21.2573	23.1771	22.7366	35.479	34.3463	35.7816	38.9028	34.4753	0.702272	8.83042e-26	ARL8A
ENSG00000136153	2.32464	2.38108	2.32964	2.24438	2.35976	1.00936	1.28049	1.18669	1.06605	1.36504	-0.979335	9.02205e-26	LMO7
ENSG00000100243	44.512	44.1646	45.6971	43.557	41.3654	25.6317	26.0735	27.5782	25.3877	30.7507	-0.695228	9.09216e-26	CYB5R3
ENSG00000176749	0.896859	0.949149	0.889817	0.757953	1.01294	2.29485	2.32014	2.94552	2.61937	2.47978	1.48654	1.04917e-25	CDK5R1
ENSG00000138443	2.69954	3.05744	2.89163	2.91997	2.77607	1.52078	1.43653	1.41804	1.3699	1.83613	-0.919479	1.10209e-25	ABI2
ENSG00000240682	4.32739	4.52512	4.37822	5.12914	5.01234	1.75313	1.89178	1.62236	2.11375	2.3606	-1.26337	1.1404e-25	ISY1
ENSG00000139641	32.6507	30.3805	32.2069	29.0255	24.7694	53.5466	52.417	58.0493	54.2792	49.9949	0.848611	1.20041e-25	ESYT1
ENSG00000166851	3.54964	3.32465	3.54025	3.70639	2.98074	1.38593	1.41946	1.46466	1.43597	1.69953	-1.20506	1.77769e-25	PLK1
ENSG00000173598	38.4563	37.0906	36.0749	38.8736	36.0261	25.1754	26.605	22.854	25.1637	25.2794	-0.576455	3.01857e-25	NUDT4
ENSG00000149781	5.63952	6.63629	5.07787	5.90973	5.32583	19.7527	20.03	22.7184	24.7914	10.874	1.77995	3.09089e-25	FERMT3
ENSG00000133466	5.57764	4.88077	4.63672	4.88971	4.47446	8.47016	7.91381	8.66007	8.66538	8.19376	0.778872	4.26757e-25	C1QTNF6
ENSG00000176907	3.79431	3.6261	3.80556	3.56845	6.55188	12.0853	13.964	14.0161	12.9719	12.8919	1.61997	5.09664e-25	C8orf4
ENSG00000117758	20.6669	20.0942	22.0292	23.3545	17.3971	37.9991	38.3886	39.32	37.6839	34.0052	0.856472	5.30766e-25	STX12
ENSG00000130513	64.6733	65.5087	73.8723	72.3971	35.0417	190.657	203.321	216.774	209.124	155.902	1.64764	7.9138e-25	GDF15
ENSG00000166402	1.16388	1.13288	1.04094	1.13495	1.28865	0.291769	0.268704	0.37715	0.291872	0.428509	-1.7963	8.60076e-25	TUB
ENSG00000183087	23.4473	25.0714	22.7279	24.2539	25.7455	14.8532	15.8054	15.291	14.9424	16.9286	-0.640069	1.04054e-24	GAS6
ENSG00000167470	20.3146	23.1909	23.2357	21.6146	22.0103	33.4473	34.6401	34.3849	38.337	39.17	0.705284	1.22886e-24	MIDN
ENSG00000134668	0.816584	1.28476	1.37442	1.37124	0.667528	9.86488	10.6224	11.9514	13.5333	4.94785	3.20748	1.33009e-24	SPOCD1
ENSG00000124570	41.721	39.6416	41.812	42.9028	46.0253	25.3993	27.5002	28.4131	26.472	28.9388	-0.633879	2.0737e-24	SERPINB6
ENSG00000085832	7.75854	7.09287	7.0693	7.87493	6.91215	4.18584	4.18109	4.0294	4.23629	4.7859	-0.776147	2.54107e-24	EPS15
ENSG00000126787	3.24508	3.21237	3.21206	3.72212	2.98674	1.21556	1.16756	1.20987	1.55332	1.05291	-1.40091	2.84293e-24	DLGAP5
ENSG00000198535	0.877863	0.621706	0.914002	0.899663	0.289019	3.57113	3.41769	3.56915	2.79244	3.55796	2.24325	3.07128e-24	C2CD4A
ENSG00000130429	37.7547	35.3314	37.1783	35.9504	34.4944	56.6992	61.0971	65.9604	68.8562	54.1546	0.763586	3.23242e-24	ARPC1B
ENSG00000142227	10.609	10.3855	10.039	11.5487	7.28686	22.4967	23.7572	29.4658	29.2338	21.6173	1.34597	3.26736e-24	EMP3
ENSG00000163762	21.0787	20.6144	23.1184	21.5165	17.4609	40.1654	38.5384	36.8232	36.3327	33.4871	0.837139	3.73763e-24	TM4SF18
ENSG00000118680	189.281	182.096	190.559	197.728	188.109	267.666	314.657	289.403	312.169	274.83	0.622017	4.02567e-24	MYL12B
ENSG00000163785	7.55729	7.46722	7.62298	7.98455	7.90029	4.40186	4.2398	4.07989	3.69652	5.03417	-0.844675	4.05789e-24	RYK
ENSG00000144228	2.68344	2.76865	2.89386	3.05017	2.61695	1.51614	1.33422	1.34246	1.23291	1.26968	-1.06405	4.41437e-24	SPOPL
ENSG00000249751	174.874	177.217	174.198	186.122	181.818	245.31	287.11	286.343	278.595	262.138	0.604103	5.27952e-24	ECSCR
ENSG00000170759	47.4093	44.0863	47.9815	50.3028	37.3821	22.5312	20.6714	20.0159	20.9564	27.2173	-1.02777	5.35423e-24	KIF5B
ENSG00000179241	12.0423	11.5086	11.012	11.0216	9.79349	5.89779	5.64424	6.95448	5.89316	6.08171	-0.860549	5.45406e-24	LDLRAD3
ENSG00000145247	8.02277	7.71526	8.12535	8.25748	7.99985	18.646	21.5807	20.7012	21.8186	13.2297	1.25794	7.40117e-24	OCIAD2
ENSG00000147526	35.1898	37.2231	37.412	34.3038	32.8258	21.9932	21.5298	21.1317	19.9721	24.6718	-0.694973	7.53834e-24	TACC1
ENSG00000163545	0.791635	0.471757	0.308247	0.402603	0.497105	2.09454	1.88609	2.79207	2.10035	2.55583	2.21908	7.62004e-24	NUAK2
ENSG00000174307	22.1632	19.5869	23.2205	20.8272	21.5181	37.0831	40.8176	44.794	46.4453	34.8868	0.926713	1.00229e-23	PHLDA3
ENSG00000167460	100.94	95.4757	100.764	99.2038	79.5301	156.477	165.583	170.264	163.379	148.784	0.757472	1.00837e-23	TPM4
ENSG00000057704	26.0656	26.464	26.6534	24.9938	32.2848	13.6471	13.1536	13.104	13.0756	17.0265	-0.963076	1.04504e-23	TMCC3
ENSG00000155380	32.5009	29.5341	30.3844	31.4395	27.4316	17.2189	19.4446	17.4915	18.2886	20.2133	-0.707055	1.16501e-23	SLC16A1
ENSG00000061918	4.23701	2.93954	3.9771	3.31304	4.3447	0.877763	0.55688	0.731831	0.883737	1.44822	-2.06082	1.22518e-23	GUCY1B3
ENSG00000174695	23.2409	22.9102	23.179	24.0937	18.6942	12.3152	13.4395	12.0355	11.3477	13.3111	-0.843796	1.40867e-23	TMEM167A
ENSG00000126458	40.1267	37.7991	41.7218	42.1843	30.0847	73.1635	83.6218	85.8362	82.767	67.89	1.03601	1.73114e-23	RRAS
ENSG00000082684	1.0563	0.726467	0.880645	0.507542	0.463921	0.0381957	0.0537415	0.061099	0.0508429	0.0295401	-3.96338	1.99706e-23	SEMA5B
ENSG00000112541	1.85285	1.94651	1.99278	1.78113	1.71348	1.07814	0.763892	0.816118	0.789321	0.749447	-1.14332	2.35909e-23	PDE10A
ENSG00000065802	2.80367	2.42471	3.03747	2.87155	2.42535	4.8685	4.76678	4.96092	4.94527	4.81355	0.846377	2.83646e-23	ASB1
ENSG00000109686	19.2954	18.4844	19.5015	17.7148	14.6302	10.4612	10.1776	9.59366	9.93744	10.4097	-0.824738	3.17263e-23	SH3D19
ENSG00000100612	6.41655	6.85058	6.21159	6.01899	7.12726	11.5096	12.2755	12.1569	11.477	10.4722	0.825425	3.18259e-23	DHRS7
ENSG00000152990	6.2617	5.94938	6.58745	5.74119	4.69311	3.27682	2.6759	2.8915	2.72999	2.92847	-1.00961	3.33378e-23	GPR125
ENSG00000175274	24.1585	25.8225	24.618	22.9809	23.5396	37.3183	35.7849	41.9628	38.8696	35.1361	0.642576	3.74545e-23	TP53I11
ENSG00000173918	0.297976	0.551549	0.360383	0.306977	0.358967	1.40806	1.36441	1.77579	1.89059	1.30046	2.04259	4.12675e-23	C1QTNF1
ENSG00000159388	18.7432	19.1191	18.8445	19.9973	25.2258	36.1726	36.7366	41.0579	39.6217	43.9916	0.953662	4.13481e-23	BTG2
ENSG00000143079	16.667	17.3965	17.5465	16.3255	14.4227	9.71278	9.30637	9.4077	9.46261	10.9758	-0.752455	4.21464e-23	CTTNBP2NL
ENSG00000103187	17.3646	17.8253	17.3326	17.0382	11.5661	36.44	39.7111	45.5714	41.3317	30.507	1.25492	4.39312e-23	COTL1
ENSG00000168918	15.0793	15.3705	15.556	14.4538	13.3666	8.14842	8.20692	8.95213	7.47503	9.67166	-0.797721	6.69737e-23	INPP5D
ENSG00000143924	5.34954	5.14706	5.26792	5.48456	5.75457	3.10071	3.12994	3.0943	3.09744	3.63007	-0.750718	6.8004e-23	EML4
ENSG00000028203	8.42356	7.94881	8.16353	8.4398	6.78789	4.34359	4.61414	3.85766	4.18459	4.84297	-0.863439	6.84019e-23	VEZT
ENSG00000114439	5.9838	6.09114	6.09267	5.93166	5.59159	3.6229	3.51469	3.41527	3.12263	4.02484	-0.745499	7.98543e-23	BBX
ENSG00000089685	4.42891	3.92986	4.18792	3.90581	3.23626	1.10608	1.84121	1.57827	1.36034	1.46187	-1.42315	8.86626e-23	BIRC5
ENSG00000143436	13.1344	13.7571	11.1986	12.6968	17.2539	4.62472	4.35645	5.59647	5.16932	6.46005	-1.37718	9.65655e-23	MRPL9
ENSG00000255529	3.66024	3.73759	3.61887	4.27935	4.58154	2.14261	1.90292	2.04389	1.80029	1.93907	-1.01717	1.0038e-22	POLR2M
ENSG00000162961	5.91579	5.72181	5.60795	5.86256	7.63529	1.68879	2.31521	1.80096	2.00589	2.90243	-1.52315	1.24284e-22	DPY30
ENSG00000119638	6.93585	6.67354	6.87049	6.10006	8.5934	2.82094	2.65431	2.86729	2.83971	4.02816	-1.20952	1.39304e-22	NEK9
ENSG00000011009	49.6974	49.2801	48.9634	50.2117	40.0807	88.797	88.1303	93.3672	91.4465	72.2537	0.86577	1.46588e-22	LYPLA2
ENSG00000132561	6.08796	7.51717	6.63588	7.02371	7.25965	1.79163	2.15176	1.70037	1.85312	3.54474	-1.64457	1.46917e-22	MATN2
ENSG00000135083	8.00981	7.52466	7.8551	7.5636	6.05476	14.0299	13.4049	14.8547	13.9915	12.1252	0.888055	1.68644e-22	CCNJL
ENSG00000153179	23.8844	20.8268	23.1351	23.5032	18.5294	12.3677	12.6572	13.155	12.7091	12.2903	-0.797571	1.70217e-22	RASSF3
ENSG00000162616	45.4458	40.3859	41.4012	49.7083	44.0854	18.5383	21.7686	17.8764	16.6295	26.2446	-1.12901	1.70706e-22	DNAJB4
ENSG00000111674	2.04251	2.19575	1.79792	1.43403	2.37231	4.33145	4.60984	5.13732	4.95255	5.74063	1.32916	1.84224e-22	ENO2
ENSG00000107796	0.62986	0.589631	0.577899	0.55133	0.427609	2.17939	2.16582	2.74291	2.48808	1.59947	2.01689	2.15896e-22	ACTA2
ENSG00000112320	1.82835	2.05092	1.70606	1.85611	1.61523	0.783366	0.872069	0.697694	0.74253	0.674642	-1.26398	2.39097e-22	SOBP
ENSG00000169744	38.2155	36.4567	37.6833	37.6118	42.1012	24.7689	23.7722	22.4428	24.518	27.0444	-0.648397	2.76895e-22	LDB2
ENSG00000039523	17.3325	18.2663	18.0155	15.9702	17.0088	26.8414	24.9933	30.555	26.9372	28.2157	0.66768	2.82574e-22	FAM65A
ENSG00000056558	0.581086	0.793373	0.587711	0.730131	0.73336	2.81081	2.41698	4.0196	3.15023	1.58703	2.02761	3.01616e-22	TRAF1
ENSG00000100934	22.8654	21.3167	23.0958	22.5817	15.973	10.2919	11.3004	10.0402	10.2876	11.7296	-0.979829	3.20814e-22	SEC23A
ENSG00000163637	3.96304	4.47942	4.50389	3.79774	3.15497	1.66188	1.51796	1.32919	1.34905	2.06487	-1.32703	3.35066e-22	PRICKLE2
ENSG00000088756	3.7095	3.87134	3.74535	3.57816	4.25104	1.69166	1.79179	1.79337	1.81206	2.4288	-1.0094	4.16348e-22	ARHGAP28
ENSG00000079102	2.98727	3.03733	3.01135	2.99445	3.78848	0.821122	1.15656	1.08638	0.794914	1.57573	-1.54206	4.55195e-22	RUNX1T1
ENSG00000135914	6.14707	5.93349	7.06158	5.28092	5.56352	2.56677	2.2041	2.45506	2.19793	2.8651	-1.28433	4.71817e-22	HTR2B
ENSG00000156642	21.4908	19.6247	20.825	22.9719	20.8666	31.1461	32.8182	30.4482	32.5236	34.4429	0.609553	4.91381e-22	NPTN
ENSG00000158270	25.4117	25.555	26.1956	25.7407	21.8588	12.7077	14.0628	13.78	12.5935	16.4936	-0.840892	5.66729e-22	COLEC12
ENSG00000112658	14.3943	13.0966	14.7787	12.5815	14.4541	21.8947	20.4099	22.7909	22.0804	23.5547	0.675988	5.90283e-22	SRF
ENSG00000060982	27.9835	27.7231	28.1604	28.4306	21.2281	15.5928	14.9936	13.5675	14.482	12.2736	-0.912866	6.37195e-22	BCAT1
ENSG00000146242	4.72323	3.62788	4.04555	4.10934	3.29535	6.92978	7.57731	7.49103	7.48947	7.75838	0.913994	6.73898e-22	TPBG
ENSG00000114480	12.2945	10.7804	12.2348	11.1805	7.48053	28.4577	28.2286	28.8648	29.8638	19.84	1.32621	6.9736e-22	GBE1
ENSG00000141682	6.64797	5.37707	5.87013	7.06699	3.51937	19.3056	18.9767	18.1491	21.3229	12.4765	1.66638	7.21973e-22	PMAIP1
ENSG00000076604	9.42679	9.94152	9.61683	10.0635	9.20714	15.3495	15.4726	19.1133	16.6485	15.2681	0.762485	7.36915e-22	TRAF4
ENSG00000172757	102.266	98.7639	102.418	106.102	97.8519	143.65	160.494	164.552	171.7	142.945	0.626514	7.81036e-22	CFL1
ENSG00000115091	19.6158	17.0152	18.5107	20.6228	15.8949	30.5178	30.7143	31.6926	31.1115	28.4278	0.734418	8.04512e-22	ACTR3
ENSG00000112531	14.0248	14.2055	14.5506	15.4738	14.5957	10.4472	10.1032	9.28002	9.55824	10.4907	-0.54646	8.35482e-22	QKI
ENSG00000213923	25.6109	27.2428	25.4214	24.873	23.4354	36.6885	37.0532	40.147	37.454	35.683	0.563431	8.39147e-22	CSNK1E
ENSG00000115504	3.04764	3.06191	2.91585	3.08927	2.95588	1.52577	1.39183	1.64253	1.80188	1.7523	-0.892018	8.54009e-22	EHBP1
ENSG00000070061	8.93549	8.82373	8.71564	8.49496	7.81984	4.74635	4.64565	4.35947	4.46833	5.71515	-0.836948	9.20741e-22	IKBKAP
ENSG00000005238	5.43681	5.56971	5.25872	5.60781	3.66638	13.3257	12.5987	15.3777	15.4248	9.39035	1.37335	1.00855e-21	FAM214B
ENSG00000205038	0.435805	0.429042	0.526693	0.468902	0.250223	0.0476222	0.0584768	0.0692526	0.0875943	0.0178572	-2.91294	1.43789e-21	PKHD1L1
ENSG00000180353	8.70051	8.08359	7.94564	10.2166	7.60487	17.9476	20.3858	18.9655	18.9259	13.718	1.08015	1.50943e-21	HCLS1
ENSG00000014824	7.68003	7.32041	7.4895	8.68673	7.19364	4.38444	4.30551	3.59665	3.27615	4.37696	-0.943789	1.5405e-21	SLC30A9
ENSG00000169184	3.48677	3.86675	3.52452	3.65689	3.04797	2.04727	1.8957	1.81251	1.69473	1.80838	-0.923497	1.67282e-21	MN1
ENSG00000158711	16.2439	16.047	16.7121	16.6948	15.0597	10.9839	10.044	9.19224	9.67946	11.2053	-0.659745	1.81112e-21	ELK4
ENSG00000147509	0.700284	0.577791	0.785504	0.690883	0.623854	2.29016	2.47302	2.28343	2.41895	1.68959	1.72458	1.8899e-21	RGS20
ENSG00000075151	15.5368	15.7117	16.6629	15.7963	14.5647	10.2431	9.61724	9.23039	9.8178	11.1442	-0.644549	1.98936e-21	EIF4G3
ENSG00000126882	37.6843	38.5482	36.0527	31.0749	44.8948	18.6112	19.2091	18.9714	18.1846	22.9251	-0.943457	2.07811e-21	FAM78A
ENSG00000181019	17.0927	12.8166	14.6761	15.2945	14.4424	25.6798	28.3091	27.2102	28.591	23.3542	0.841654	2.2261e-21	NQO1
ENSG00000163191	173.932	164.658	159.152	171.533	140.565	278.459	324.649	317.739	326.498	246.045	0.883195	2.43621e-21	S100A11
ENSG00000144583	7.15544	7.15745	7.01503	6.0313	5.17203	11.9213	11.6886	12.4993	12.339	12.169	0.900196	2.59923e-21	2023-03-04
ENSG00000167100	2.62378	2.61176	2.90054	2.20027	2.54027	4.36257	4.55772	4.90527	4.49231	4.83055	0.846207	2.67075e-21	SAMD14
ENSG00000241839	14.8392	14.7697	14.4914	13.7409	12.8935	22.3949	20.6474	23.2359	23.4744	21.2346	0.651098	3.02559e-21	PLEKHO2
ENSG00000198929	0.947544	1.07948	1.05049	0.897377	1.05064	0.298272	0.352953	0.252835	0.268761	0.433757	-1.64618	3.31329e-21	NOS1AP
ENSG00000074201	11.4967	10.3777	10.8315	12.3047	11.8171	6.53603	6.87622	6.28003	5.88512	7.36712	-0.786678	3.95853e-21	CLNS1A
ENSG00000111785	2.15915	2.14468	2.05712	2.40858	2.02455	1.0293	1.10709	1.07327	1.16917	1.0614	-0.988158	4.61321e-21	RIC8B
ENSG00000134744	2.42295	2.53048	2.30015	2.35114	2.65529	1.21441	1.39172	1.07596	1.18382	1.52089	-0.94145	4.81621e-21	ZCCHC11
ENSG00000079332	17.9623	16.6159	17.0106	17.6894	15.3584	10.7708	10.44	10.8445	10.3987	11.9487	-0.636805	4.8997e-21	SAR1A
ENSG00000092841	80.836	71.7049	77.4008	84.6387	104.19	145.132	170.879	166.24	177.07	146.826	0.944704	4.90436e-21	MYL6
ENSG00000197603	2.36568	2.38824	2.48701	2.34145	2.46518	1.47542	1.15721	1.04197	1.06972	1.3879	-0.973084	6.19031e-21	C5orf42
ENSG00000157191	17.3379	16.1925	17.8108	18.0127	18.117	24.9854	26.1139	26.7133	25.9919	23.9014	0.545496	6.40063e-21	NECAP2
ENSG00000229953	0.780605	0.863366	0.461557	0.786315	0.131355	3.99876	6.44263	5.60219	8.09901	4.60857	3.28043	8.16488e-21	RP11-284F21.7
ENSG00000037474	13.6599	13.5174	14.2545	14.787	14.8103	8.75405	8.66289	9.04771	8.73589	10.218	-0.645305	9.96537e-21	NSUN2
ENSG00000166326	13.9211	13.603	14.0502	13.359	12.9284	8.38973	8.29759	8.43322	7.64678	9.87454	-0.670029	1.16761e-20	TRIM44
ENSG00000168497	188.967	186.386	192.988	214.082	240.423	91.4588	103.319	83.2832	91.2195	126.652	-1.04442	1.47584e-20	SDPR
ENSG00000114353	117.154	112.478	114.394	115.24	100.394	160.569	165.433	177.655	176.821	156.724	0.581104	1.54416e-20	GNAI2
ENSG00000114446	5.76092	5.78192	5.55849	5.6659	5.32734	2.58814	3.07309	2.94517	3.00817	3.40116	-0.903588	1.59003e-20	IFT57
ENSG00000171208	5.12351	4.60459	4.84033	4.61301	4.67823	7.22946	6.99289	7.66728	7.36019	7.08626	0.60782	1.78002e-20	NETO2
ENSG00000260244	1.33249	1.66082	1.38249	1.45873	1.35168	0.227276	0.23024	0.145423	0.169417	0.374981	-2.64237	1.9567e-20	RP11-588K22.2
ENSG00000108262	17.629	17.6634	19.0917	16.0139	15.1515	27.6754	26.664	29.7835	31.2908	26.7657	0.733336	2.16254e-20	GIT1
ENSG00000198369	3.20175	3.0705	3.21304	2.64824	3.06197	5.2237	6.28218	5.70592	5.45215	5.1131	0.869633	2.54524e-20	SPRED2
ENSG00000079385	1.13065	0.990845	0.886683	0.992659	0.576783	2.79733	3.31823	2.74218	3.13925	2.06357	1.62558	3.00366e-20	CEACAM1
ENSG00000111897	41.0142	37.8166	41.9899	45.0298	37.7066	63.2785	65.8525	62.5516	62.5427	57.9842	0.61731	3.02911e-20	SERINC1
ENSG00000169418	22.9179	24.4492	24.8485	22.0636	29.5437	9.99056	9.52048	9.23526	9.09553	14.9325	-1.23038	3.26e-20	NPR1
ENSG00000173597	4.81732	4.84459	5.02563	5.25048	2.55821	1.15536	1.02765	0.930538	1.10128	1.87457	-1.8836	3.88713e-20	SULT1B1
ENSG00000180190	4.71292	4.87411	4.84168	4.98201	5.99387	2.02331	2.18486	2.29803	1.82178	2.81579	-1.19039	4.23582e-20	TDRP
ENSG00000177595	4.62641	4.9367	4.93782	5.616	4.77562	8.27337	7.87632	8.88767	8.45438	7.64377	0.724698	4.53769e-20	PIDD1
ENSG00000177542	5.37368	5.6099	5.52397	5.62017	6.02141	2.36997	2.25497	3.08592	2.0218	3.14598	-1.12806	4.58466e-20	SLC25A22
ENSG00000182093	4.97577	4.98199	5.36496	5.85034	4.87598	9.37414	9.9559	9.09652	10.546	8.0424	0.851928	4.71153e-20	WRB
ENSG00000118777	8.86898	8.76208	9.75441	9.06089	9.51926	2.16988	2.31823	2.18326	2.23235	4.86697	-1.73843	4.74115e-20	ABCG2
ENSG00000141753	810.269	791.213	781.009	791.984	806.924	578.036	595.235	587.302	597.134	643.558	-0.407702	5.64453e-20	IGFBP4
ENSG00000070961	7.0987	6.73089	6.8488	7.56571	7.8716	4.30734	4.09432	4.04596	3.60014	4.80965	-0.792124	5.8693e-20	ATP2B1
ENSG00000139645	15.6981	16.8161	17.4203	15.4616	13.9642	27.8969	23.5734	29.2252	27.2316	24.8757	0.743122	6.65022e-20	ANKRD52
ENSG00000144677	19.5554	20.5498	18.0986	21.1324	19.386	13.4533	13.7119	13.4174	13.7804	13.4711	-0.541297	6.8129e-20	CTDSPL
ENSG00000164932	20.5081	20.8697	22.8184	24.2639	12.502	57.9267	65.0517	62.0239	68.9197	39.1664	1.53829	6.93639e-20	CTHRC1
ENSG00000142627	62.0182	60.9368	64.3594	59.3594	43.0166	113.713	110.13	122.711	122.003	97.7131	0.967219	9.62756e-20	EPHA2
ENSG00000134057	7.63333	8.16353	7.13488	8.64449	7.39552	3.43863	4.55049	4.13779	3.90918	3.73753	-0.980381	9.9842e-20	CCNB1
ENSG00000153561	10.31	10.3266	11.1238	10.5645	8.68505	5.33705	5.55512	5.50523	5.53455	6.76451	-0.829146	1.11007e-19	RMND5A
ENSG00000141655	4.75921	5.02783	4.62304	4.75867	5.95653	1.56628	1.53984	1.74783	1.44975	2.83498	-1.45892	1.19003e-19	TNFRSF11A
ENSG00000073711	5.40249	4.92682	5.22312	4.67726	4.9485	2.82868	2.31328	2.87098	2.16429	3.04201	-0.928132	1.261e-19	PPP2R3A
ENSG00000171056	11.4276	12.857	12.3655	14.2705	14.3035	20.5501	22.0703	23.0777	22.0804	25.8979	0.80029	1.38745e-19	SOX7
ENSG00000162783	10.4783	10.2932	11.8978	12.778	12.6156	19.3917	19.8774	23.0337	22.2271	25.5862	0.922121	1.42154e-19	IER5
ENSG00000171148	10.916	10.1311	9.76423	10.7409	9.95906	14.9775	15.0732	15.2537	15.1123	14.8655	0.548463	1.48735e-19	TADA3
ENSG00000151640	1.42832	1.2176	1.15665	0.93833	0.642672	3.68646	3.87567	3.59207	4.00539	2.64363	1.73514	1.66831e-19	DPYSL4
ENSG00000117906	10.486	10.1601	9.67274	10.9937	9.92292	6.10401	7.1311	5.92112	6.26007	6.99781	-0.660561	1.76014e-19	RCN2
ENSG00000159640	45.1526	48.1711	43.5739	40.3717	60.633	20.1211	19.3455	17.9116	18.2566	28.0604	-1.19805	1.85765e-19	ACE
ENSG00000147065	182.963	174.785	185.779	172.699	125.572	328.516	322.611	368.954	351.361	279.959	0.972201	1.85879e-19	MSN
ENSG00000196924	254.046	256.669	272.831	223.641	184.394	453.074	422.715	466.012	460.28	401.158	0.886773	2.104e-19	FLNA
ENSG00000184349	7.29724	6.62433	6.95262	6.37518	4.43452	3.09512	2.74487	2.71168	2.19731	2.77253	-1.22662	2.55962e-19	EFNA5
ENSG00000159840	112.589	117.484	112.768	110.133	75.5761	201.63	206.821	220.938	220.84	186.762	0.972454	3.07176e-19	ZYX
ENSG00000082146	5.04946	4.05556	4.10076	4.22845	3.51648	7.82779	8.33638	8.38681	8.86283	7.24013	0.960168	3.2458e-19	STRADB
ENSG00000011426	4.5273	4.33438	4.01536	3.99532	3.11354	1.86839	1.7915	1.8976	1.93699	2.15092	-1.04816	3.37254e-19	ANLN
ENSG00000152332	12.5644	11.4084	12.613	11.945	9.9341	7.43068	7.24252	6.60123	6.8998	7.48343	-0.712576	3.47418e-19	UHMK1
ENSG00000099282	25.8654	24.2382	22.61	24.1925	21.0348	34.4556	35.5724	36.3848	35.9978	36.2481	0.600519	3.83574e-19	TSPAN15
ENSG00000178585	15.2005	16.6062	15.8392	17.1364	16.3709	10.3415	10.7188	10.0034	11.2211	11.0127	-0.607117	3.84127e-19	CTNNBIP1
ENSG00000179820	35.8687	34.304	34.7797	32.9234	23.6252	58.4137	58.178	62.1555	60.8265	61.9696	0.901465	3.92526e-19	MYADM
ENSG00000162490	0.205843	0.226766	0.0952518	0.170386	0.101654	1.27829	1.30225	1.05259	1.26647	0.450509	2.75207	4.08466e-19	DRAXIN
ENSG00000184344	12.0982	12.4366	15.7658	15.9229	11.4514	3.54964	3.94149	4.45041	4.69944	6.77657	-1.52999	4.16219e-19	GDF3
ENSG00000118515	7.0337	6.90085	7.2654	7.42648	5.89909	13.6685	13.4103	13.1619	14.5808	10.0528	0.910411	4.23875e-19	SGK1
ENSG00000143603	1.00565	1.08067	0.921948	0.86349	0.87134	0.419586	0.324697	0.466098	0.456122	0.338023	-1.24017	4.30036e-19	KCNN3
ENSG00000131669	15.0457	14.6937	13.9389	15.1483	13.5363	25.003	26.0465	30.3736	27.3903	21.2001	0.845755	4.30451e-19	NINJ1
ENSG00000150540	1.18882	0.900663	1.09117	1.25321	1.29797	2.66172	2.75692	2.89181	2.74129	2.2164	1.20806	4.32211e-19	HNMT
ENSG00000104332	6.60067	6.94781	7.75262	7.02313	5.33283	3.63261	3.66734	3.27483	3.41637	3.35972	-0.954748	4.67773e-19	SFRP1
ENSG00000080608	11.6819	11.9779	11.2441	11.5815	11.7333	6.69632	6.45003	6.60257	6.42945	8.05976	-0.765125	5.22566e-19	KIAA0020
ENSG00000179134	12.7458	12.804	13.1934	11.2592	10.6772	7.05932	7.4146	7.51246	6.8183	8.07054	-0.718021	5.68314e-19	SAMD4B
ENSG00000135821	13.4371	12.759	14.4096	13.0067	12.2805	8.35688	7.99925	7.7611	7.43466	9.37745	-0.686511	5.71175e-19	GLUL
ENSG00000137033	28.8806	29.3537	30.7413	32.6871	36.3008	5.29832	5.69646	4.46173	4.14405	11.0025	-2.36768	5.83343e-19	IL33
ENSG00000035403	62.1961	61.0072	64.5338	60.8628	40.5422	113.247	111.913	113.775	113.296	107.761	0.953828	6.02945e-19	VCL
ENSG00000133872	64.6229	59.8519	61.0402	64.3071	55.8275	36.4944	40.5412	36.841	37.0845	44.0275	-0.648234	6.06642e-19	TMEM66
ENSG00000182511	12.1961	11.4017	11.0097	11.4648	11.8672	16.8465	16.4046	18.459	16.7297	18.5579	0.586739	6.52759e-19	FES
ENSG00000121892	13.193	12.3531	12.8383	12.5271	9.96976	7.89902	6.9397	6.63195	6.92323	7.40212	-0.765495	6.55017e-19	PDS5A
ENSG00000134291	7.62445	6.98517	7.46703	7.03226	7.32069	2.9759	3.75396	3.28299	3.27829	4.62069	-1.02436	6.74515e-19	TMEM106C
ENSG00000182541	9.72846	9.96063	10.2728	10.0368	10.5457	14.4488	14.0626	14.4326	14.176	13.5783	0.483286	7.64128e-19	LIMK2
ENSG00000102181	18.9063	18.8538	20.9681	19.1159	15.9667	10.5209	11.018	12.2316	10.8521	11.9551	-0.729099	8.31664e-19	CD99L2
ENSG00000108669	7.6648	7.14324	8.22686	7.50991	8.53267	12.095	11.5522	12.2117	12.2677	11.1838	0.601061	8.70666e-19	CYTH1
ENSG00000196535	5.80888	6.06447	6.36681	5.53786	6.51928	4.0683	3.70823	3.97893	3.77899	4.08687	-0.627141	9.43026e-19	MYO18A
ENSG00000171105	11.3107	10.9925	12.2132	10.2142	8.02653	5.13516	4.2247	4.41495	3.85755	6.00486	-1.15762	1.01984e-18	INSR
ENSG00000105327	9.8203	9.39179	10.0851	10.2524	9.62795	16.3907	17.7341	18.735	19.3848	14.1459	0.81267	1.08871e-18	BBC3
ENSG00000154027	3.3352	3.56842	3.49742	3.30791	2.42478	1.29705	1.03455	1.03511	1.05192	1.71838	-1.39159	1.19619e-18	AK5
ENSG00000155827	8.92184	7.24978	8.89432	9.54862	8.78159	4.49479	4.37527	4.65831	4.31456	5.57501	-0.889465	1.2665e-18	RNF20
ENSG00000138180	2.81388	2.96469	3.40483	4.13629	3.13525	1.29004	1.268	1.45323	1.14157	1.38647	-1.33145	1.27093e-18	CEP55
ENSG00000177283	25.9225	28.6545	27.6213	26.5032	23.0017	16.1338	17.1145	17.5042	17.3064	15.4051	-0.657847	1.38393e-18	FZD8
ENSG00000069812	1.56853	1.61746	1.55292	1.53223	0.90231	5.64977	5.69129	5.8492	6.77722	2.62962	1.89299	1.40282e-18	HES2
ENSG00000196449	8.38906	7.10276	7.08916	6.33238	5.50727	13.2796	15.497	15.7582	14.9731	12.3512	1.06535	1.4597e-18	YRDC
ENSG00000105137	10.4627	9.93314	10.3679	10.1768	11.0491	15.2891	14.6449	17.5194	16.6962	16.3068	0.629452	1.53437e-18	SYDE1
ENSG00000073792	25.2008	24.3378	26.0086	24.9866	23.2358	13.7567	13.2806	13.0106	13.1257	17.8098	-0.801675	1.55307e-18	IGF2BP2
ENSG00000069849	79.5598	69.9006	78.1002	83.0839	51.3826	139.841	148.707	154.869	145.119	131.039	0.991365	1.62512e-18	ATP1B3
ENSG00000198663	15.2806	14.9626	16.0074	14.7058	12.2221	9.23067	8.84067	9.16161	8.99327	9.39328	-0.680964	1.64017e-18	C6orf89
ENSG00000163884	2.47003	1.96363	2.72304	1.88351	3.86312	0.500836	0.563742	0.333813	0.444447	0.7962	-2.29163	1.65592e-18	KLF15
ENSG00000014914	0.372327	0.375805	0.27942	0.350528	0.487968	1.34633	1.58829	1.8223	1.94375	0.961138	2.03032	1.81748e-18	MTMR11
ENSG00000132692	0.0666643	0.120653	0.189203	0.108786	0.0908643	0.711118	0.773302	0.655522	0.564738	0.745722	2.57895	1.9311e-18	BCAN
ENSG00000164647	15.5359	15.084	15.4297	15.0749	21.3227	6.47358	7.32784	7.21557	8.41259	8.59888	-1.11848	2.04601e-18	STEAP1
ENSG00000140632	22.3675	23.2863	22.4499	21.5964	22.0704	13.7227	12.8536	14.414	13.4678	16.6267	-0.652587	2.27975e-18	GLYR1
ENSG00000112414	58.5282	55.4072	59.122	54.9881	41.6812	23.6734	24.1045	21.5281	20.2947	33.1565	-1.13557	2.32706e-18	GPR126
ENSG00000140450	2.47026	2.70293	3.03578	2.94208	2.40849	1.09466	1.31429	1.13623	0.97918	1.3094	-1.21716	2.38684e-18	ARRDC4
ENSG00000106052	10.2436	9.96432	10.5041	11.9661	9.27229	6.36801	6.38682	5.82972	6.2426	6.94106	-0.709056	2.48286e-18	TAX1BP1
ENSG00000160446	7.31618	6.80387	6.96037	6.35731	6.11512	11.3739	11.7206	12.2269	10.5279	10.8082	0.757973	2.8468e-18	ZDHHC12
ENSG00000020181	48.007	52.9049	51.2411	43.1088	54.4087	26.7577	26.8783	27.6104	26.3787	34.7961	-0.809896	3.03503e-18	GPR124
ENSG00000087095	7.08398	7.41142	7.95837	7.40245	7.07698	10.6507	11.217	10.4835	10.9709	10.9596	0.555492	3.10779e-18	NLK
ENSG00000128645	12.7827	11.4469	13.9353	13.2182	6.78065	29.9721	32.2463	32.3158	29.4175	24.8557	1.35703	3.15079e-18	HOXD1
ENSG00000104419	3.39999	3.4038	3.67442	3.76195	4.56632	7.00025	6.9533	7.73619	8.40162	6.03313	0.940201	3.31837e-18	NDRG1
ENSG00000075275	9.38985	10.7178	11.0965	8.73143	6.67098	4.97979	4.33062	4.51866	4.39357	4.3885	-1.04299	3.56442e-18	CELSR1
ENSG00000120217	3.40885	2.93993	3.67631	3.22098	3.22357	5.84488	6.46501	6.57251	6.5631	8.87661	1.05979	3.58034e-18	CD274
ENSG00000111348	112.222	110.327	110.573	101.058	80.1226	192.096	206.357	207.327	206.699	157.355	0.915348	3.72329e-18	ARHGDIB
ENSG00000087074	21.7872	22.0625	22.9055	21.5441	23.419	29.8027	31.9455	33.0322	34.9492	33.7043	0.548154	3.79777e-18	PPP1R15A
ENSG00000154102	2.92398	2.59143	3.3954	3.47067	2.25978	9.6738	10.4901	10.9847	11.6654	5.17038	1.71403	4.37552e-18	C16orf74
ENSG00000136111	17.7148	17.4603	19.4162	18.7545	13.7507	30.9481	28.8167	29.1959	28.4887	29.7869	0.758041	4.55658e-18	TBC1D4
ENSG00000257219	2.73707	2.47684	3.59279	2.48138	2.86017	9.1054	10.6947	11.7155	11.0664	5.51114	1.7634	4.92907e-18	RP11-54A9.1
ENSG00000108055	14.5022	13.7775	13.6943	14.9181	13.7764	10.2321	9.42041	9.20678	9.29722	9.83442	-0.557341	5.06326e-18	SMC3
ENSG00000135241	5.35884	4.7129	4.82487	4.99493	4.11935	2.78918	2.57298	2.28114	2.41187	2.87616	-0.890103	6.52423e-18	PNPLA8
ENSG00000147548	5.22437	5.00072	5.07326	5.48664	5.01687	3.77591	3.55716	3.69841	3.63087	3.64051	-0.494774	6.92919e-18	WHSC1L1
ENSG00000144674	10.4155	9.87961	9.63415	10.4195	8.66124	6.78075	5.68226	5.77309	5.5703	6.43853	-0.695371	7.30436e-18	GOLGA4
ENSG00000118971	2.25976	2.04492	2.2405	2.28184	1.08512	6.74294	6.00086	7.49189	7.15397	3.99895	1.6652	7.89151e-18	CCND2
ENSG00000058091	3.70959	3.1221	3.5373	3.1888	2.75807	1.78098	1.84821	1.70471	1.57275	1.6663	-0.926363	9.27458e-18	CDK14
ENSG00000135776	6.16353	5.61948	6.06939	6.63808	5.26377	3.3375	3.28514	3.09752	2.85515	3.65757	-0.872304	1.01351e-17	ABCB10
ENSG00000185442	21.6701	20.9384	20.7973	22.4358	13.3946	9.21415	9.98362	9.17288	10.2877	9.29093	-1.04883	1.18213e-17	FAM174B
ENSG00000145386	5.16932	5.20943	4.81401	5.75151	4.12787	2.06039	2.51045	2.37845	1.96789	2.5189	-1.13121	1.23703e-17	CCNA2
ENSG00000131236	56.5394	52.4275	59.4566	53.008	39.9156	89.3358	95.9085	101.817	94.1871	86.4494	0.839908	1.32045e-17	CAP1
ENSG00000101057	7.88364	7.3055	7.22313	7.38326	4.87617	2.78222	2.81851	2.94419	2.68928	3.55313	-1.22647	1.43037e-17	MYBL2
ENSG00000106484	3.12325	2.35097	3.05967	2.63843	2.51552	0.84702	0.678942	0.93065	0.847318	1.44249	-1.52447	1.43191e-17	MEST
ENSG00000186767	4.05612	3.59824	3.65411	3.47453	3.54301	1.61682	1.7224	1.40092	1.59876	2.21802	-1.09697	1.45383e-17	SPIN4
ENSG00000138678	2.08532	2.17869	1.81588	2.13112	1.90923	0.788321	0.790886	0.603097	0.69348	0.901263	-1.41937	1.53306e-17	AGPAT9
ENSG00000272886	7.71506	6.54461	8.24162	7.75312	6.82523	3.73454	3.52666	4.36533	3.67732	4.74123	-0.886465	1.61627e-17	DCP1A
ENSG00000161542	9.17142	9.64556	9.3864	9.74911	10.116	13.2501	12.9187	13.1528	13.8636	13.5219	0.471967	1.67663e-17	PRPSAP1
ENSG00000135250	14.9094	14.3082	13.5453	15.0111	12.3811	8.3886	8.04963	8.30607	6.97668	9.52005	-0.765667	1.75779e-17	SRPK2
ENSG00000087077	22.3606	22.7614	21.8298	23.1221	25.8867	35.8038	36.2182	35.1056	37.8787	31.9553	0.60877	1.80278e-17	TRIP6
ENSG00000198959	411.295	396.771	404.912	337.294	321.561	207.866	209.891	212.752	203.808	257.346	-0.777901	2.00897e-17	TGM2
ENSG00000119711	3.48406	3.00141	2.87185	3.51549	4.03932	1.50361	1.66242	1.4232	1.57276	1.945	-1.06192	2.07634e-17	ALDH6A1
ENSG00000129474	10.1272	10.3982	9.99627	9.78924	10.1915	13.5783	13.516	13.9926	13.9619	13.6738	0.444338	2.48364e-17	AJUBA
ENSG00000106948	2.98302	2.95196	2.78321	2.82243	2.6627	4.74855	4.31637	4.89654	4.65072	3.99477	0.671794	2.66806e-17	AKNA
ENSG00000232533	8.21804	12.3027	8.90847	6.62252	8.9887	20.728	23.3315	26.0171	26.1752	18.9154	1.35311	2.79369e-17	AC093673.5
ENSG00000133401	1.02975	0.859583	1.05869	0.720171	0.872056	1.76679	1.78342	1.89629	1.89358	2.55456	1.12502	2.82403e-17	PDZD2
ENSG00000107290	13.3871	12.6633	13.444	12.1267	12.0481	9.30653	8.14451	8.21747	8.84693	9.13231	-0.544075	3.11757e-17	SETX
ENSG00000185947	2.06586	2.08552	2.20976	2.55991	2.16963	4.18552	4.04575	4.62365	4.16731	3.43542	0.882857	3.28876e-17	ZNF267
ENSG00000168297	5.35385	4.91152	5.29299	5.05409	5.61622	3.03046	2.97377	2.94763	2.86066	3.59428	-0.767609	3.3148e-17	PXK
ENSG00000007384	15.921	15.9933	15.2479	14.3973	14.8216	20.8994	20.8969	23.6417	23.7624	22.8232	0.552922	3.42323e-17	RHBDF1
ENSG00000169679	1.70028	1.18356	1.65302	1.80824	1.41956	0.433527	0.576702	0.472828	0.493135	0.731529	-1.51911	3.45498e-17	BUB1
ENSG00000166037	5.85135	5.32017	5.05008	5.89228	5.95215	3.51523	3.31614	3.57913	3.76117	3.36593	-0.67843	3.5794e-17	CEP57
ENSG00000213203	11.1111	11.9454	12.4297	12.2133	15.8309	5.7274	6.81951	5.71545	6.26884	7.81566	-0.974889	3.6986e-17	GIMAP1
ENSG00000111275	34.3526	30.8952	32.6118	33.0883	35.1413	22.2872	24.0105	22.6607	23.6462	21.8838	-0.537465	3.71677e-17	ALDH2
ENSG00000166401	5.31427	5.13042	4.91166	5.39024	3.23723	10.1789	10.5071	11.9456	12.0424	8.62025	1.15379	4.00798e-17	SERPINB8
ENSG00000127463	13.581	13.4238	14.082	12.5417	8.65252	6.37296	6.42592	6.33205	6.16847	6.66952	-0.961632	4.0965e-17	EMC1
ENSG00000102024	106.936	96.6541	104.536	109.355	80.7346	166.526	172.804	171.547	175.5	146.229	0.741011	4.86588e-17	PLS3
ENSG00000125844	64.096	66.5427	70.5233	54.9233	56.5379	35.4637	31.5606	34.4867	32.0164	42.8211	-0.825859	5.00383e-17	RRBP1
ENSG00000091527	37.637	37.8188	39.9771	41.7778	40.6636	53.0225	51.9462	52.7417	52.2458	53.0621	0.410289	5.82138e-17	CDV3
ENSG00000139370	3.38531	3.35573	3.17225	3.11244	3.21564	5.1798	5.50175	5.23554	4.79045	5.11831	0.669543	6.03397e-17	SLC15A4
ENSG00000124772	16.3755	19.1925	14.8965	16.1647	15.3623	9.46946	9.47453	8.19717	8.3566	10.8648	-0.822006	6.09774e-17	CPNE5
ENSG00000182253	2.80836	2.63267	2.62503	2.64511	2.36852	1.36819	1.24914	1.15914	1.2789	1.69302	-0.951973	6.11323e-17	SYNM
ENSG00000099204	62.0212	60.3014	64.7961	54.1382	51.1856	25.6431	24.0725	21.3942	22.5305	38.2517	-1.14871	6.43366e-17	ABLIM1
ENSG00000267583	15.0006	14.4188	12.2222	13.6644	22.9352	34.2581	35.5666	39.8547	40.6267	34.3228	1.23514	6.47067e-17	RP11-322E11.5
ENSG00000198894	3.58493	3.3788	3.88366	3.51993	3.0058	1.54749	1.72924	2.00903	1.71956	1.96577	-0.95232	6.67368e-17	CIPC
ENSG00000109805	2.67199	2.16407	2.41724	2.32549	1.84121	0.785027	0.693308	0.953083	0.707357	1.17067	-1.40158	7.01647e-17	NCAPG
ENSG00000132356	14.5353	14.7488	14.3398	16.8101	14.9965	9.58999	9.42863	7.73539	8.19683	10.2999	-0.737049	7.21804e-17	PRKAA1
ENSG00000063046	120.492	112.299	117.607	118.808	114.123	90.0481	89.6682	88.7794	94.5013	86.3547	-0.376408	7.54413e-17	EIF4B
ENSG00000214944	10.6297	11.242	11.4999	10.3466	11.0775	16.5773	15.3225	15.1419	14.3948	16.6626	0.511226	7.68389e-17	ARHGEF28
ENSG00000162511	31.346	26.8758	28.2289	28.1083	21.4705	54.1138	55.1076	58.9856	55.0736	40.3581	0.955188	8.10714e-17	LAPTM5
ENSG00000136811	7.72313	8.13352	8.21794	7.76616	8.18434	4.39725	4.74027	5.04621	4.69249	5.83812	-0.69581	8.40807e-17	ODF2
ENSG00000148700	12.8252	13.2704	12.721	13.6683	14.4761	9.14067	9.85921	8.72069	8.44695	9.2477	-0.560976	8.52435e-17	ADD3
ENSG00000176170	21.0811	19.5483	20.7835	21.7032	10.4843	44.6282	42.7956	52.1421	49.244	41.1765	1.29755	8.82163e-17	SPHK1
ENSG00000163513	203.662	192.912	204.221	186.715	155.627	117.791	118.166	121.249	116.111	128.708	-0.647541	9.45405e-17	TGFBR2
ENSG00000204682	2.83664	2.59826	2.42383	2.71278	2.6326	0.797438	0.915198	0.983799	1.11559	1.46725	-1.32132	9.49099e-17	CASC10
ENSG00000109436	18.3164	16.9785	18.6284	17.0734	12.3681	33.572	33.0726	33.9128	32.712	25.956	0.93413	1.06345e-16	TBC1D9
ENSG00000168615	25.8393	24.7683	26.6962	27.9261	21.6547	40.9915	44.3886	40.221	42.1959	35.7627	0.682166	1.06389e-16	ADAM9
ENSG00000154258	1.03591	1.22386	0.810304	1.06957	1.23655	0.461726	0.4026	0.374496	0.422436	0.48283	-1.32625	1.09361e-16	ABCA9
ENSG00000137200	10.0474	10.5022	10.8792	10.7701	10.1285	6.44585	7.15399	7.22248	6.42012	7.51839	-0.590351	1.27349e-16	CMTR1
ENSG00000138433	5.72499	5.51734	5.95748	5.28386	5.3211	2.24203	2.01891	2.25147	2.42731	3.52572	-1.15542	1.31266e-16	CIR1
ENSG00000160326	9.75022	9.59631	9.17476	8.28376	5.6112	18.8035	17.1023	25.9607	20.5779	17.5028	1.238	1.4688e-16	SLC2A6
ENSG00000163527	33.2526	31.6105	33.5178	32.8814	27.8716	20.3721	19.1002	18.0833	17.9564	22.8783	-0.693147	1.49679e-16	STT3B
ENSG00000112984	3.02311	3.63757	3.62412	3.28282	2.75457	0.885932	1.58877	0.896736	1.24724	1.50195	-1.41688	1.53786e-16	KIF20A
ENSG00000071189	2.62689	2.48223	2.47901	2.33793	2.6138	1.45885	1.32426	1.11179	1.28367	1.70218	-0.865164	2.08613e-16	SNX13
ENSG00000182095	14.5273	16.3404	15.0923	13.9904	15.0356	8.88746	8.07218	8.29304	8.03952	11.0317	-0.75837	2.09415e-16	TNRC18
ENSG00000059728	1.98755	2.16392	2.22186	2.59958	1.70884	3.99586	4.35028	4.23132	4.25515	3.60903	0.937957	2.1222e-16	MXD1
ENSG00000034510	1021.16	1003.72	993.268	1090.51	1205.44	1591.5	1849.26	1740.91	1839.6	1472.22	0.676396	2.21218e-16	TMSB10
ENSG00000182718	123.3	118.34	123.38	132.512	108.092	186.454	205.908	200.354	207.067	161.792	0.667	2.69552e-16	ANXA2
ENSG00000250588	1.71481	1.90261	2.49957	2.27109	2.37118	4.00351	4.56705	4.34129	4.5791	3.85035	0.983477	2.72181e-16	IQCJ-SCHIP1
ENSG00000123240	21.356	19.0014	20.6548	20.9155	15.8614	35.0256	33.0321	33.9844	33.0735	28.5436	0.743623	2.75436e-16	OPTN
ENSG00000167112	13.5223	13.5721	13.9965	14.3068	12.9305	7.97698	8.39665	9.05843	9.33537	8.3661	-0.66354	2.93952e-16	TRUB2
ENSG00000146540	11.98	11.8964	11.93	11.6178	15.0725	7.14005	6.58052	7.37155	8.254	7.338	-0.769447	2.9923e-16	C7orf50
ENSG00000164307	17.7911	17.1555	18.282	16.3692	14.4056	11.505	11.1903	10.8013	10.7699	11.2852	-0.59597	3.40929e-16	ERAP1
ENSG00000132436	5.74643	5.62555	5.53678	6.05025	6.04246	3.80161	3.38873	3.77712	3.59569	3.87146	-0.653367	3.52355e-16	FIGNL1
ENSG00000065150	24.7858	23.7766	24.8892	24.2947	17.4353	13.8088	13.7862	13.6774	13.4418	13.2508	-0.760709	3.62866e-16	IPO5
ENSG00000130309	67.9045	74.258	73.5539	65.7697	50.576	117.616	116.32	138.039	125.842	105.612	0.861875	3.64267e-16	COLGALT1
ENSG00000242265	6.24124	6.32383	6.88666	6.44233	5.05353	9.46265	10.0911	10.1006	9.84961	10.2891	0.687414	3.74914e-16	PEG10
ENSG00000128989	31.3847	29.9748	31.5112	33.3386	27.7959	20.6815	21.9252	20.1768	19.3701	22.5315	-0.556686	3.89457e-16	ARPP19
ENSG00000131016	49.8893	46.2692	54.7144	47.9767	37.7776	84.0596	78.0023	84.4801	81.5135	71.4313	0.755677	3.93605e-16	AKAP12
ENSG00000054654	2.02426	2.63014	2.32132	2.07832	3.24972	1.2029	1.21965	1.18784	1.03888	1.36152	-1.03421	4.02749e-16	SYNE2
ENSG00000117399	8.87129	8.52413	9.72787	9.00767	8.15884	2.82873	2.626	3.14101	4.65818	4.72124	-1.29968	4.12317e-16	CDC20
ENSG00000113594	7.85784	7.17596	7.76057	7.45034	7.06218	5.42026	4.8098	4.03337	4.58239	4.76278	-0.659446	4.13989e-16	LIFR
ENSG00000151012	7.38899	6.63098	7.57516	7.11895	5.31644	15.1893	13.1645	13.6223	13.7471	10.1349	0.953219	4.16478e-16	SLC7A11
ENSG00000169083	4.38982	4.46611	4.87019	3.77911	2.6889	2.02838	1.9323	1.71659	1.87267	1.69346	-1.12652	4.28358e-16	AR
ENSG00000169429	3.23807	3.40114	4.17965	4.58684	1.35734	19.262	15.9448	21.9628	17.2	13.9605	2.39953	4.51003e-16	CXCL8
ENSG00000187210	4.38431	4.12397	4.34866	4.49118	7.88002	1.11269	1.61473	1.30428	1.10656	2.33271	-1.75675	4.58139e-16	GCNT1
ENSG00000138160	2.96255	2.96245	3.68337	3.70371	2.16138	1.16175	1.48661	0.925922	1.14598	1.2232	-1.38005	4.68128e-16	KIF11
ENSG00000179627	1.78461	1.8587	1.52308	1.55684	1.4661	3.01348	3.03223	4.21992	3.598	4.00202	1.12849	4.80594e-16	ZBTB42
ENSG00000149218	13.0591	14.8512	14.7548	14.8784	17.6425	7.18973	6.55129	7.01818	6.72456	10.1468	-0.9987	4.93793e-16	ENDOD1
ENSG00000171848	5.7717	5.1149	5.73097	5.20847	4.15951	1.65524	2.17366	1.67564	2.05642	3.05502	-1.29052	5.03229e-16	RRM2
ENSG00000140416	25.6546	26.2342	25.7461	26.1535	18.5458	39.3799	40.7151	42.506	40.4269	41.6207	0.742567	5.38723e-16	TPM1
ENSG00000270607	0.194971	0.529304	0.587942	0.388867	0.413387	2.67905	2.89651	2.55625	2.89043	1.27225	2.52966	5.50919e-16	RP11-359E10.1
ENSG00000145365	2.6143	2.58973	2.57936	2.32801	2.24905	3.92954	4.20273	4.62301	4.51215	4.96055	0.848924	5.68068e-16	TIFA
ENSG00000023909	5.82238	5.37859	5.7019	6.33416	5.52946	9.56184	9.21999	9.41345	9.96046	7.88123	0.67881	5.93305e-16	GCLM
ENSG00000120742	23.3714	23.3337	23.3666	23.9676	25.9269	31.2934	33.536	31.9492	32.5201	31.9066	0.425563	5.93734e-16	SERP1
ENSG00000102241	13.8994	12.8246	13.9453	15.5659	14.1127	8.43351	9.68477	8.77134	8.81932	9.49775	-0.638573	6.1368e-16	HTATSF1
ENSG00000196998	2.45074	1.99198	2.26472	2.32823	2.21137	3.78087	4.15122	4.65447	4.33701	3.67989	0.873956	6.15113e-16	WDR45
ENSG00000185129	2.58985	2.32897	2.47405	2.44085	2.5331	1.65836	1.41646	1.62286	1.55821	1.62457	-0.648967	6.61037e-16	PURA
ENSG00000128805	4.26471	4.40305	3.94579	4.03326	3.53762	7.38635	7.55468	8.5684	8.84537	5.81868	0.920163	7.03418e-16	ARHGAP22
ENSG00000111817	4.01365	3.58516	4.01433	3.82664	2.46803	1.79594	1.89846	1.77644	1.6852	1.62649	-1.02674	7.03441e-16	DSE
ENSG00000129667	3.7126	4.70004	4.34546	3.74454	4.75259	6.97843	7.20761	9.06213	7.02909	8.39982	0.862297	7.31475e-16	RHBDF2
ENSG00000023330	18.4063	17.6886	19.314	16.8984	15.4298	27.9352	26.7748	31.2901	31.994	25.7372	0.713002	8.13946e-16	ALAS1
ENSG00000123104	11.2719	11.1475	11.7489	10.1301	14.24	6.91282	6.38542	5.39849	6.14029	7.52254	-0.855368	8.60537e-16	ITPR2
ENSG00000157500	6.76794	7.17343	7.13847	6.71198	6.95823	4.97736	4.91767	4.63207	4.40046	4.93215	-0.542482	8.92707e-16	APPL1
ENSG00000134759	6.70036	5.60106	6.41157	6.59141	5.70343	3.91993	4.27326	3.8138	4.01419	4.21382	-0.615205	9.0321e-16	ELP2
ENSG00000172738	1.10495	1.239	1.51261	1.08883	0.745753	3.12689	3.17744	3.56614	2.98294	2.59743	1.44671	9.73576e-16	TMEM217
ENSG00000151151	2.57274	2.15353	2.62409	2.41987	1.19325	5.49458	5.71568	5.51849	5.82017	4.8665	1.32557	9.99076e-16	IPMK
ENSG00000071967	8.05292	7.99994	7.58165	7.83034	8.47359	4.92592	5.37661	4.05309	4.36519	5.31634	-0.732982	1.03817e-15	CYBRD1
ENSG00000198862	5.24414	5.73757	5.18982	5.74136	4.89086	3.46177	3.13535	2.59204	2.97337	3.5421	-0.770197	1.07655e-15	LTN1
ENSG00000100918	2.27471	2.33703	2.27536	1.70559	1.69658	5.31863	4.38557	5.12778	4.31368	3.61912	1.14903	1.08878e-15	REC8
ENSG00000107957	3.45051	3.51214	3.39761	3.16874	3.1083	2.17892	2.25913	2.19965	2.15343	1.87152	-0.641506	1.11892e-15	SH3PXD2A
ENSG00000111206	4.63124	3.95465	4.47319	4.16122	2.64319	1.31686	1.84583	1.41757	1.7595	1.78067	-1.2894	1.18292e-15	FOXM1
ENSG00000091127	13.1905	13.3629	14.6797	14.2232	13.9858	8.81876	8.97312	8.93141	9.69165	10.3691	-0.569994	1.32335e-15	PUS7
ENSG00000134954	25.437	23.2017	25.5866	24.6198	23.802	35.2821	34.5576	36.074	37.2175	31.0244	0.50599	1.328e-15	ETS1
ENSG00000144655	11.7824	10.0329	10.9581	9.55052	8.13204	16.6611	16.4225	17.5113	18.0179	16.99	0.764884	1.33065e-15	CSRNP1
ENSG00000137960	6.55292	5.12129	6.39898	7.30594	8.14481	3.17133	3.43495	2.52052	2.4054	3.51704	-1.15645	1.33489e-15	GIPC2
ENSG00000100554	8.02665	6.96963	7.09157	7.54322	6.6987	3.56511	4.24895	3.71245	4.97262	3.87813	-0.833957	1.37747e-15	ATP6V1D
ENSG00000138442	2.52196	2.82494	3.06355	2.90873	2.91106	1.69191	1.80883	1.84609	1.7391	1.70426	-0.696905	1.43064e-15	WDR12
ENSG00000130958	12.176	9.74909	11.8579	11.5526	8.70026	20.7461	20.4367	20.7431	21.3167	16.469	0.885774	1.52829e-15	SLC35D2
ENSG00000181026	8.78339	8.67988	8.31339	7.52709	7.80919	12.246	13.0171	13.6175	13.4298	11.141	0.626496	1.55888e-15	AEN
ENSG00000125845	13.9668	14.2911	16.808	14.5821	10.0369	24.9052	24.1693	27.3514	26.9783	26.4988	0.899477	1.56359e-15	BMP2
ENSG00000122861	5.99499	6.11072	5.33684	6.34415	2.37949	29.1925	29.775	37.5339	40.2047	16.4745	2.55037	1.59327e-15	PLAU
ENSG00000130311	11.0432	10.1745	11.7356	10.4914	10.1279	14.8969	16.5351	17.4723	17.2682	15.1215	0.601859	1.65995e-15	DDA1
ENSG00000112893	11.2402	10.7759	11.4251	11.1285	8.54937	17.9782	17.9997	18.3676	18.1431	15.0479	0.721118	1.72495e-15	MAN2A1
ENSG00000197498	4.15721	3.5041	3.61278	4.088	3.68109	1.74267	2.08095	2.11698	2.00098	2.23454	-0.903652	1.84331e-15	RPF2
ENSG00000105556	5.66761	5.80735	5.56806	5.91284	5.03118	9.36417	9.68859	10.1543	10.2572	7.78672	0.756529	2.0791e-15	MIER2
ENSG00000163132	2.01575	1.62766	2.3654	2.44596	2.53614	5.69095	4.9542	5.05246	4.17948	5.86841	1.22475	2.09983e-15	MSX1
ENSG00000106617	4.73086	4.11337	4.49869	4.31545	3.79655	6.71923	7.27534	6.52607	6.97684	6.21043	0.653441	2.18158e-15	PRKAG2
ENSG00000075618	280.037	278.712	287.301	273.314	227.33	175.98	176.158	194.552	183.045	181.932	-0.562763	2.21202e-15	FSCN1
ENSG00000073060	13.1302	12.4429	11.9844	12.4118	12.6951	8.53753	8.52962	7.67176	8.61734	9.60339	-0.544362	2.24403e-15	SCARB1
ENSG00000185070	8.98406	9.30619	9.44181	8.76475	7.29371	5.62837	5.90976	5.40652	5.06691	5.98477	-0.645185	2.30061e-15	FLRT2
ENSG00000231991	78.6354	74.4839	79.2901	90.6896	64.7674	128.188	134.91	129.805	138.43	112.478	0.731575	2.30958e-15	ANXA2P2
ENSG00000116584	10.0614	10.3683	11.0875	9.42812	10.033	14.4239	14.4926	15.1044	14.5562	13.344	0.49643	2.33429e-15	ARHGEF2
ENSG00000198586	5.4385	5.33894	5.4559	5.8557	5.13451	3.5767	2.86652	2.99884	3.22334	3.85766	-0.719021	2.37533e-15	TLK1
ENSG00000144802	2.82939	2.45959	2.35137	2.4035	1.50987	7.39131	6.58546	6.58284	7.09886	3.73821	1.44465	2.47851e-15	NFKBIZ
ENSG00000111339	8.81383	8.66049	9.4723	9.30506	5.76702	3.98953	3.55401	4.20588	4.01778	4.65463	-1.03944	2.48469e-15	ART4
ENSG00000015479	20.7335	19.2853	20.1254	22.0418	20.0254	14.8551	15.5539	14.3042	14.4562	15.7736	-0.447631	2.68995e-15	MATR3
ENSG00000067836	3.78436	3.16611	3.27726	3.88397	2.78453	6.56776	6.15754	7.57187	7.06268	5.49127	0.96229	2.74185e-15	ROGDI
ENSG00000185585	0.838128	0.926008	0.66556	0.804009	1.23979	0.246681	0.247915	0.150323	0.187635	0.345222	-1.9266	2.74745e-15	OLFML2A
ENSG00000088325	8.24312	7.3604	7.74771	8.81227	6.00717	3.08291	3.95261	4.09641	3.9852	4.26706	-0.976707	2.78476e-15	TPX2
ENSG00000117410	16.4035	16.2409	16.7095	16.8945	17.97	22.6802	24.2799	25.854	22.7913	26.0053	0.529272	2.82444e-15	ATP6V0B
ENSG00000221926	1.95834	2.02532	2.15044	2.19811	2.56862	3.96217	4.02096	5.25919	3.62454	4.87897	0.993626	2.89406e-15	TRIM16
ENSG00000196159	9.29835	9.61585	10.3787	8.2702	8.53701	5.86769	5.41642	5.07379	4.58913	6.32282	-0.757169	2.904e-15	FAT4
ENSG00000109911	3.31833	2.97603	3.25842	2.95462	3.43257	1.36596	1.44708	1.17106	0.969731	1.51903	-1.30064	2.95868e-15	ELP4
ENSG00000163346	23.4399	22.7099	23.1211	21.1573	25.1697	34.6163	33.5616	34.6278	37.0598	30.5554	0.559531	3.11281e-15	PBXIP1
ENSG00000069702	3.93484	3.79311	3.90519	4.11502	4.22059	2.70365	2.41307	2.42453	2.34108	2.83725	-0.650392	3.49574e-15	TGFBR3
ENSG00000069399	4.78583	4.47763	4.78422	5.05575	6.18839	8.54274	8.60463	8.99284	8.45288	9.94336	0.813232	3.91695e-15	BCL3
ENSG00000117586	6.78791	7.36503	8.03204	7.81699	3.71293	30.1837	31.9383	32.4939	35.7226	16.1532	2.11985	4.00774e-15	TNFSF4
ENSG00000167996	330.114	307.17	291.751	298.63	281.486	476.485	507.069	497.83	503.57	384.773	0.651035	4.04402e-15	FTH1
ENSG00000135900	14.894	14.2948	14.9778	15.8554	13.8414	8.39808	9.22327	8.62954	9.812	9.74684	-0.688698	4.2947e-15	MRPL44
ENSG00000197646	4.36442	4.75447	5.2516	5.01519	2.33656	13.9974	12.1632	12.1668	11.8283	8.73292	1.44175	4.45622e-15	PDCD1LG2
ENSG00000173653	5.24638	5.24419	4.90621	5.4926	5.50196	7.97726	8.33146	8.61291	8.34699	8.04186	0.645297	4.50972e-15	RCE1
ENSG00000139629	4.47423	4.88291	4.7302	4.41321	2.86626	11.6163	9.00525	12.4483	11.0091	7.05701	1.25999	4.56728e-15	GALNT6
ENSG00000131389	3.04269	2.78945	2.84697	2.86676	1.918	5.16273	5.66529	5.47491	5.70477	4.35105	0.971375	4.63373e-15	SLC6A6
ENSG00000173846	5.36688	5.43806	5.43042	5.13964	6.29628	8.57578	9.36449	8.98142	8.73205	10.781	0.744774	4.64634e-15	PLK3
ENSG00000101384	11.5403	10.722	12.4081	10.127	11.7429	17.3548	16.2266	17.9208	17.3611	15.3538	0.57468	4.67574e-15	JAG1
ENSG00000102172	38.0769	36.9908	39.8721	39.2936	40.0804	53.4893	57.2654	56.4845	59.5973	49.7097	0.5086	4.75448e-15	SMS
ENSG00000188522	2.16198	2.09996	2.08038	1.8465	1.47277	3.88621	3.38904	4.40988	3.80089	3.27595	0.96061	4.88183e-15	FAM83G
ENSG00000104341	82.0724	74.6045	79.9779	81.2103	75.2437	49.5798	54.0285	49.5423	50.9956	61.4584	-0.565523	5.03785e-15	LAPTM4B
ENSG00000076248	14.2399	13.8595	14.2424	13.6294	13.498	8.61274	9.48604	8.59223	10.1085	9.21557	-0.594334	5.38099e-15	UNG
ENSG00000113739	2.8967	2.51451	2.94975	3.05405	2.3072	5.44087	6.30984	6.99166	7.6323	4.2004	1.15664	5.86606e-15	STC2
ENSG00000163131	2.36356	2.01221	2.75828	2.55158	1.95461	4.51226	4.68345	4.58711	3.81711	4.94288	0.955888	6.03496e-15	CTSS
ENSG00000158555	18.8231	21.3447	20.1635	18.3453	18.6581	12.7213	12.1699	12.6028	12.0972	14.9566	-0.592401	6.49209e-15	GDPD5
ENSG00000154262	3.14064	3.57778	3.49835	3.45376	2.30431	1.67155	1.66877	1.64821	1.63243	1.85794	-0.912695	7.03677e-15	ABCA6
ENSG00000117862	17.242	15.3897	16.6898	15.6313	15.0036	10.4948	10.6704	10.0919	10.8969	11.8351	-0.565548	7.21055e-15	TXNDC12
ENSG00000097021	7.36515	7.61705	7.67757	7.22632	5.64954	12.8405	12.9285	13.0018	11.7862	10.5066	0.782598	8.29884e-15	ACOT7
ENSG00000175414	5.39311	5.21784	5.48548	4.52001	5.17429	3.48017	2.80223	2.90932	2.42464	3.31058	-0.788155	8.57253e-15	ARL10
ENSG00000123159	24.6393	25.1509	24.9525	25.9486	22.1559	35.5658	37.3209	40.7402	41.7367	32.8238	0.615538	8.6593e-15	GIPC1
ENSG00000033178	5.87742	5.9067	6.48285	6.15213	5.59586	4.07585	4.17231	4.0361	3.88637	4.50852	-0.537063	8.9849e-15	UBA6
ENSG00000272796	1.58256	1.97531	1.8997	1.53367	1.22935	0.419321	0.555281	0.552389	0.577864	0.775771	-1.51132	9.26036e-15	RP1-74M1.3
ENSG00000011105	26.6245	26.8316	28.4713	24.7006	25.4145	36.165	35.9776	37.5577	39.2982	34.3218	0.473465	9.29782e-15	TSPAN9
ENSG00000168528	7.50252	7.6777	6.90059	6.6841	4.01186	14.7535	15.3813	16.662	17.8151	11.6908	1.22083	1.04105e-14	SERINC2
ENSG00000075856	7.55911	6.80771	7.24965	7.41037	6.94272	4.63461	3.68943	4.31483	4.0127	5.19215	-0.718213	1.06767e-14	SART3
ENSG00000139977	6.81239	6.42126	7.28398	7.32865	5.9912	12.208	12.3865	11.9836	12.1567	8.98508	0.77081	1.08263e-14	NAA30
ENSG00000126653	4.66476	4.54312	4.35566	5.12191	4.70282	2.73296	3.00663	2.42653	2.05433	2.77993	-0.847514	1.12317e-14	NSRP1
ENSG00000197043	46.0222	44.0804	46.4804	42.5247	40.335	62.8713	59.7972	71.9872	67.0677	59.5016	0.549941	1.21707e-14	ANXA6
ENSG00000162441	5.55321	5.42982	5.63482	5.90907	6.3254	2.65894	2.94502	3.17581	3.03534	3.77279	-0.889655	1.2384e-14	LZIC
ENSG00000136935	5.23202	5.51546	5.23133	5.3176	5.45063	3.61394	3.60106	3.35907	3.2491	3.84882	-0.597956	1.32126e-14	GOLGA1
ENSG00000175426	0.2106	0.201788	0.153823	0.213388	0.0844266	0.940707	0.831963	0.83599	0.894421	0.461925	2.21532	1.34171e-14	PCSK1
ENSG00000151276	11.2932	12.15	12.0284	11.062	14.0303	8.26515	7.86184	7.66066	7.80724	8.64916	-0.590118	1.40858e-14	MAGI1
ENSG00000136490	8.75667	9.42873	9.19196	9.63441	10.9324	14.2287	15.9172	16.4427	17.0994	13.51	0.685713	1.43002e-14	LIMD2
ENSG00000125740	0.686687	0.621401	0.67204	0.579605	0.340676	0.0856223	0.0481883	0.102723	0.159562	0.0772558	-2.60737	1.45991e-14	FOSB
ENSG00000196510	6.05036	6.67313	6.9382	6.59607	7.06696	4.64858	4.63127	4.45105	4.07604	4.34478	-0.590497	1.48647e-14	ANAPC7
ENSG00000115053	76.0107	71.9438	75.957	77.2452	69.4915	57.7085	59.193	56.9588	57.0781	56.4212	-0.367073	1.51345e-14	NCL
ENSG00000157214	0.580874	0.648527	0.61555	0.772817	1.14248	0.109113	0.0921135	0.101815	0.0798831	0.295354	-2.469	1.54929e-14	STEAP2
ENSG00000128602	8.76896	9.1083	8.27782	7.59032	8.36077	4.70111	5.41573	5.74845	5.31447	5.57274	-0.654629	1.61927e-14	SMO
ENSG00000184743	12.3011	12.0397	12.9203	13.8812	12.0987	19.1279	17.6926	18.0299	18.2623	16.4666	0.502508	1.62178e-14	ATL3
ENSG00000136630	4.71594	5.62353	4.98622	5.20207	7.42355	9.3664	10.9211	11.2091	10.5668	13.3833	0.986327	1.68893e-14	HLX
ENSG00000049239	18.4093	19.0845	18.761	15.9222	14.5062	11.6748	11.2249	10.6959	11.1355	10.382	-0.652948	1.71423e-14	H6PD
ENSG00000051523	11.6526	11.1473	12.6625	13.2806	14.5183	20.8023	23.2756	21.8441	23.0194	17.6902	0.751851	1.73673e-14	CYBA
ENSG00000111711	9.5259	8.43182	8.91039	10.3978	7.17388	15.5444	14.8661	15.2888	16.1355	13.4735	0.762599	1.80021e-14	GOLT1B
ENSG00000160685	7.22683	7.21723	7.4124	6.52402	6.97641	11.1876	10.5096	11.7687	11.7959	9.49981	0.631365	1.80231e-14	ZBTB7B
ENSG00000178078	1.83019	1.57015	2.1081	1.85316	2.05182	3.76019	4.28085	3.43709	4.50758	3.63373	1.05601	1.85951e-14	STAP2
ENSG00000115738	0.566504	0.21585	0.581777	0.513583	0.519284	1.48244	1.69898	1.78211	2.41102	2.3347	2.01791	1.9017e-14	ID2
ENSG00000153815	21.8877	22.435	20.546	20.2169	16.2265	11.7573	10.2787	11.8327	10.9601	13.9867	-0.784151	1.91527e-14	CMIP
ENSG00000164134	4.58288	4.772	5.09132	4.48616	4.62364	3.3596	3.39584	3.12593	2.93899	3.15516	-0.560373	2.09621e-14	NAA15
ENSG00000143771	7.50553	6.81529	6.5653	6.44195	6.33769	9.48962	10.3535	10.6421	9.36054	10.5429	0.583138	2.24488e-14	CNIH4
ENSG00000137393	35.3685	31.4311	32.2705	33.6885	31.7364	20.408	20.4376	19.9142	19.5188	25.7105	-0.633824	2.27384e-14	RNF144B
ENSG00000132819	10.8676	11.9829	9.68215	11.1838	8.43318	17.7236	19.3021	18.9951	19.015	15.5382	0.797868	2.38593e-14	RBM38
ENSG00000138646	1.58636	1.87244	1.78625	1.82585	2.76807	0.798087	0.50531	0.664918	0.796759	0.810116	-1.46165	2.40928e-14	HERC5
ENSG00000125810	219.932	223.944	229.172	201.554	151.444	351.031	350.414	354.665	349.515	330.028	0.758434	2.43526e-14	CD93
ENSG00000205502	21.9009	23.1344	25.1483	27.7441	12.2961	46.3341	51.1369	57.1584	48.2585	63.7699	1.27556	2.5987e-14	C2CD4B
ENSG00000151746	2.92242	2.68619	2.74602	2.77448	2.75458	1.87055	1.68439	1.67956	1.5542	2.02413	-0.654374	2.68644e-14	BICD1
ENSG00000180304	22.7033	21.2738	22.4772	23.8613	25.9399	14.0698	14.9649	15.1117	15.8079	17.4806	-0.586517	2.77328e-14	OAZ2
ENSG00000138448	38.2568	35.6919	40.0166	39.1835	23.282	73.9451	71.5495	70.9445	70.8891	58.3377	0.970459	2.83231e-14	ITGAV
ENSG00000101474	57.6803	57.8695	59.6168	58.7526	54.5306	75.0294	81.4818	81.5107	79.2276	72.1246	0.432915	2.87775e-14	APMAP
ENSG00000137507	76.198	78.1598	78.3438	67.703	56.1028	29.7363	30.1256	34.483	29.1252	48.325	-1.05309	2.9307e-14	LRRC32
ENSG00000189266	27.7695	22.8787	27.131	27.221	24.8529	38.71	40.3107	38.3395	40.4814	34.7542	0.56905	2.94183e-14	PNRC2
ENSG00000272068	0.224453	0.166184	0.199072	0.0924933	0.108158	1.19898	0.934322	1.06223	0.667856	0.684759	2.54251	2.95259e-14	RP11-284F21.9
ENSG00000185033	1.37945	1.65591	1.71451	1.65894	1.343	2.64673	3.0269	3.2658	3.10755	2.44059	0.902311	2.97678e-14	SEMA4B
ENSG00000065600	3.97083	4.30789	5.00257	5.09302	3.70729	7.7299	7.36928	8.02581	7.884	7.52929	0.804948	3.06864e-14	TMEM206
ENSG00000140848	13.5781	14.2369	12.6497	13.1293	13.0777	17.7282	17.8829	18.7102	19.1063	17.0759	0.441065	3.08482e-14	CPNE2
ENSG00000053438	2.78792	2.24764	2.87728	2.25176	4.14543	7.37752	8.40731	9.08919	7.90505	5.85925	1.42446	3.08869e-14	NNAT
ENSG00000108387	0.623636	0.534642	0.676838	0.572817	0.733208	0.118687	0.150294	0.174034	0.126389	0.298321	-1.8563	3.21993e-14	SEPT4
ENSG00000133874	8.83395	7.16601	8.17838	7.37057	4.39737	16.3217	16.1514	16.9986	16.6354	13.4842	1.15049	3.37483e-14	RNF122
ENSG00000138613	5.52855	5.57687	6.03902	5.93423	5.29188	8.28637	9.09581	9.00979	8.97384	7.5966	0.598722	3.51807e-14	APH1B
ENSG00000171792	8.30821	8.80139	9.28812	9.06556	7.17652	5.19445	4.78381	4.98791	4.83709	5.31005	-0.761518	3.58977e-14	RHNO1
ENSG00000067225	61.2877	56.8283	61.2149	59.5679	40.3682	99.8517	97.829	119.772	111.884	87.5922	0.888431	3.71642e-14	PKM
ENSG00000111341	96.4616	98.2921	96.1153	112.633	55.0468	37.7224	40.4325	37.418	41.3934	50.4407	-1.14441	4.05601e-14	MGP
ENSG00000164953	1.07179	1.17105	1.31674	1.38912	1.21438	0.581335	0.630117	0.673523	0.527346	0.629067	-1.02053	4.09782e-14	TMEM67
ENSG00000137478	10.0365	10.5158	10.7561	9.93761	9.82621	7.35461	7.31126	7.20783	6.85592	7.60758	-0.49068	4.22445e-14	FCHSD2
ENSG00000118473	5.40914	6.25204	5.88276	5.92784	6.14395	3.6532	3.35221	3.19411	2.95998	4.34623	-0.75838	4.30016e-14	SGIP1
ENSG00000163453	196.178	205.488	193.371	208.64	157.313	269.415	313.781	288.655	310.648	296.596	0.622267	4.49065e-14	IGFBP7
ENSG00000178177	1.9005	1.48853	1.74372	1.71702	2.32244	0.995282	0.853556	0.88449	0.940001	0.977447	-0.980859	4.94539e-14	LCORL
ENSG00000113048	12.9449	12.7102	12.7528	13.2461	12.3866	8.3704	9.91491	9.37413	9.44818	8.73496	-0.482693	5.10567e-14	MRPS27
ENSG00000118503	0.820014	0.965846	1.03898	0.790612	1.30102	2.22387	1.97341	2.40922	2.46842	3.36096	1.3334	5.23846e-14	TNFAIP3
ENSG00000146083	12.2545	13.3493	12.8055	11.8679	12.956	17.5988	16.7007	18.8572	19.8478	17.2813	0.513536	5.31012e-14	RNF44
ENSG00000232926	1.25319	1.91915	1.79547	1.74788	2.1169	7.32014	5.78731	6.87701	7.60955	4.22352	1.83911	5.60289e-14	AC000078.5
ENSG00000153914	5.64089	5.68518	5.40902	6.04196	6.50953	4.05666	3.96103	3.75971	3.82025	4.415	-0.549673	6.14296e-14	SREK1
ENSG00000184916	23.9052	25.7152	24.7751	24.8678	20.5531	35.0445	33.433	35.5194	33.6975	33.1674	0.512478	6.22735e-14	JAG2
ENSG00000100714	7.93504	7.38149	7.72676	7.99867	6.17672	5.01625	4.81065	4.53631	4.5405	4.50023	-0.667677	6.23141e-14	MTHFD1
ENSG00000122203	30.9278	29.0506	32.215	28.0536	25.6624	43.6806	42.516	46.4702	43.9185	39.3199	0.565817	6.27487e-14	KIAA1191
ENSG00000154640	5.61649	6.63049	5.71468	5.2469	4.05868	9.99993	10.7918	14.1272	14.5186	9.96627	1.1253	6.41432e-14	BTG3
ENSG00000075292	7.34649	7.54093	7.72683	7.44027	7.0396	5.54631	4.89157	4.5397	4.5287	5.49694	-0.568505	6.76793e-14	ZNF638
ENSG00000165733	10.6677	9.4923	10.3488	10.1247	7.87239	5.87196	4.99595	5.32186	4.66934	6.5847	-0.820571	7.16764e-14	BMS1
ENSG00000125170	2.49905	2.42299	2.63053	2.75109	3.03609	4.31966	4.03788	4.58009	5.04939	4.99196	0.782154	7.91952e-14	DOK4
ENSG00000155903	4.2674	3.7227	3.97944	4.27652	3.28955	6.4758	7.16638	6.13389	6.88546	5.73693	0.731606	8.2092e-14	RASA2
ENSG00000009954	17.5244	16.6343	17.4442	17.0535	13.6088	10.6849	10.6516	11.5473	10.9385	10.9573	-0.585945	8.24936e-14	BAZ1B
ENSG00000010319	14.0384	13.3092	14.3593	12.6794	10.4117	5.76416	6.0209	6.615	6.07506	8.97702	-0.953097	8.44068e-14	SEMA3G
ENSG00000144036	4.72507	4.8775	5.17548	4.3773	4.72174	3.40782	2.98198	3.35413	3.3369	3.21322	-0.550774	8.66899e-14	EXOC6B
novel.97	0.851852	1.10878	1.06601	1.08965	0.848282	2.01484	2.11355	2.08117	2.26915	1.66431	1.03126	8.90646e-14	-
ENSG00000140307	8.45401	7.14891	8.93577	8.55719	9.75783	3.4502	4.09235	4.41128	4.54323	5.60449	-0.956169	9.15597e-14	GTF2A2
ENSG00000119326	24.4835	20.4456	23.4097	26.194	21.6561	13.3443	12.9479	11.8622	12.1282	16.8336	-0.791127	9.35949e-14	CTNNAL1
ENSG00000134597	7.11107	6.69813	6.44762	7.57316	8.18716	4.49269	3.63134	3.46589	4.17347	4.18923	-0.852045	9.38182e-14	RBMX2
ENSG00000196876	2.70175	3.00835	2.83149	2.77945	2.67718	1.99873	1.66989	1.76013	1.65601	1.96268	-0.628243	9.51622e-14	SCN8A
ENSG00000022567	6.26282	5.47387	6.43523	5.0546	3.11147	2.62365	2.21489	2.27514	2.14689	2.24269	-1.19377	9.97379e-14	SLC45A4
ENSG00000214078	25.5105	24.2065	24.8076	23.8213	26.175	17.9879	17.6885	18.9191	18.2781	19.4151	-0.432299	9.98533e-14	CPNE1
ENSG00000110237	32.7378	35.0701	36.4689	30.6605	25.0823	20.112	17.6799	20.6372	18.7499	20.0646	-0.718326	1.03837e-13	ARHGEF17
ENSG00000109685	5.78787	5.98668	6.0769	5.69022	5.5936	4.08418	3.47748	3.77537	3.67075	4.54004	-0.575201	1.16547e-13	WHSC1
ENSG00000198435	91.0763	100.837	105.32	108.665	95.8263	52.717	60.4722	58.3669	59.499	76.1053	-0.707935	1.24213e-13	NRARP
ENSG00000074657	7.51458	8.0397	8.04074	7.50582	6.85248	11.1296	10.3388	10.2195	10.6921	10.1793	0.470366	1.27498e-13	ZNF532
ENSG00000127920	210.382	196.962	203.026	227.212	245.121	297.746	335.385	301.817	317.523	305.427	0.52484	1.4123e-13	GNG11
ENSG00000198753	3.72492	4.73777	4.64349	4.04893	4.06396	6.59042	6.24389	6.59398	6.23227	6.66474	0.607014	1.44007e-13	PLXNB3
ENSG00000171241	2.07893	1.81457	1.88308	2.01839	1.45142	0.679762	0.870162	0.852837	0.894196	0.79717	-1.17341	1.50781e-13	SHCBP1
ENSG00000204103	4.0303	3.84001	3.88389	3.8646	3.18392	1.85672	1.97163	1.68117	1.79068	2.36618	-0.956947	1.53171e-13	MAFB
ENSG00000263465	17.2522	17.8127	18.8045	20.0649	18.2301	11.6711	12.3232	12.6666	12.3813	14.1956	-0.543577	1.55368e-13	SRSF8
ENSG00000170006	0.953228	0.862601	0.840404	0.828172	0.571435	2.53385	2.03227	2.03481	2.28861	1.23767	1.32324	1.58532e-13	TMEM154
ENSG00000091879	45.2477	38.8849	48.8982	43.8762	22.5582	98.6629	91.767	91.4357	89.4762	74.7374	1.16133	1.63277e-13	ANGPT2
ENSG00000174136	7.7068	7.04543	7.91044	7.35317	6.72388	11.3324	10.8805	12.0565	10.1608	10.0505	0.569247	1.64534e-13	RGMB
ENSG00000269378	86.9034	79.5204	86.9383	95.7166	87.3869	129.112	133.026	118.955	130.527	116.836	0.525772	1.66423e-13	ITGB1P1
ENSG00000213626	3.56629	3.14851	2.99586	3.18056	1.82229	6.6706	5.76778	7.32329	7.03368	5.45965	1.13614	1.77716e-13	LBH
ENSG00000241553	18.5863	17.1985	16.5007	17.0647	20.3522	25.6805	26.4215	28.4753	26.6979	24.5619	0.554772	1.77986e-13	ARPC4
ENSG00000205730	9.2696	8.76414	10.1024	9.20477	9.58869	5.94326	5.75462	5.97169	5.44423	7.25711	-0.627641	1.81069e-13	ITPRIPL2
ENSG00000184588	21.0452	21.1986	19.657	20.2859	22.5823	27.3029	29.2618	26.7041	27.6835	28.3033	0.41017	1.82017e-13	PDE4B
ENSG00000049130	2.77563	2.59054	2.78034	2.97027	2.28312	5.5595	5.704	5.59297	5.29156	3.64266	0.945733	1.86396e-13	KITLG
ENSG00000270696	3.9138	3.91631	4.83969	4.84464	3.50508	1.56491	1.79976	2.1042	1.81137	1.61371	-1.24095	1.96043e-13	RP11-342K6.1
ENSG00000147471	13.6552	12.2181	13.1827	12.3622	13.4625	8.09656	8.13775	7.78383	7.25573	9.83292	-0.658081	2.06883e-13	PROSC
ENSG00000133056	16.0834	16.7346	16.3335	14.9228	19.5877	9.64658	9.18827	10.9673	9.1095	12.0046	-0.716623	2.15329e-13	PIK3C2B
ENSG00000156052	18.8932	17.7701	19.1141	20.3561	16.7998	13.2331	13.0283	13.0412	12.8984	14.0526	-0.487624	2.19997e-13	GNAQ
ENSG00000138018	3.45173	3.66619	3.36823	3.15019	2.71271	2.11266	2.04165	1.82314	1.91673	1.85606	-0.743816	2.2494e-13	EPT1
ENSG00000165175	4.66629	4.11276	4.7848	4.35619	5.05717	7.35458	6.60149	7.34138	7.36426	7.14733	0.638898	2.40773e-13	MID1IP1
ENSG00000137968	2.99549	3.04128	3.26773	3.49157	3.95961	2.21728	1.62491	1.67028	1.57746	1.85833	-0.905179	2.47588e-13	SLC44A5
ENSG00000180488	2.54233	2.86493	2.8687	3.19322	3.00445	1.97613	1.75018	1.67798	1.91965	1.70558	-0.681328	2.49081e-13	FAM73A
ENSG00000131089	4.3153	3.74455	4.13317	3.48345	3.56609	2.43145	2.5564	2.18453	2.20037	2.39707	-0.707919	2.52018e-13	ARHGEF9
ENSG00000124222	15.1757	16.0665	14.0086	14.7399	14.9673	8.76511	7.85871	7.14719	7.68308	11.2259	-0.812025	2.53541e-13	STX16
ENSG00000144136	13.3799	13.4946	13.1529	13.9362	10.0246	22.6562	21.0156	21.8654	21.6184	17.9891	0.717325	2.5383e-13	SLC20A1
ENSG00000037280	69.7698	71.82	73.948	63.0164	59.6705	47.1996	42.5099	48.7092	44.6571	48.8792	-0.543999	2.69197e-13	FLT4
ENSG00000144747	6.83839	6.75776	6.87323	7.27257	6.41588	5.044	4.77907	3.90296	4.1596	4.42197	-0.613967	2.76063e-13	TMF1
ENSG00000155366	60.8641	54.5015	59.5549	63.5091	41.8365	91.5244	96.4764	105.612	102.46	85.2951	0.780594	2.77868e-13	RHOC
ENSG00000173894	3.69935	3.84978	4.06027	4.28653	4.54329	6.42712	5.65811	6.78713	6.37677	7.11248	0.661427	2.85218e-13	CBX2
ENSG00000131943	3.77743	4.15948	4.01166	3.62404	4.21188	6.04492	5.80905	6.23429	6.21359	5.5155	0.590212	2.92775e-13	C19orf12
ENSG00000049249	0.041538	0.00939722	0.0368409	0.00941442	0.00786346	0.253464	0.327566	0.440487	0.349885	0.193606	3.94089	2.95658e-13	TNFRSF9
ENSG00000137807	1.57737	1.68863	1.85619	1.85061	1.11636	0.698987	0.692368	0.606269	0.75427	0.749616	-1.20496	2.98995e-13	KIF23
ENSG00000166164	6.53417	5.56966	6.52314	6.78707	7.18145	4.26918	4.38788	4.33629	4.17357	4.58273	-0.584372	3.01313e-13	BRD7
ENSG00000187742	4.8506	5.48679	5.28848	5.32677	5.36747	3.56729	2.76098	3.04209	3.04418	3.85964	-0.69291	3.04007e-13	SECISBP2
ENSG00000171552	31.6223	30.2137	30.5626	28.7222	23.5398	50.6629	46.7515	52.2302	52.7856	39.1313	0.740268	3.06907e-13	BCL2L1
ENSG00000107201	5.05958	4.57855	5.184	4.72385	3.75121	9.2842	9.00572	8.77973	8.66537	6.5045	0.860197	3.25093e-13	DDX58
ENSG00000122862	145.661	137.811	145.823	158.924	138.823	93.2896	110.984	102.603	107.903	94.6918	-0.513214	3.45277e-13	SRGN
ENSG00000109083	4.66546	4.68281	5.4931	4.70985	5.81605	2.48633	2.19744	2.41579	2.19659	3.38051	-1.00102	3.55106e-13	IFT20
ENSG00000198743	1.5905	1.55751	2.2923	1.77665	1.51837	0.729171	0.664697	0.810458	0.721805	1.07491	-1.12533	3.55407e-13	SLC5A3
ENSG00000106367	38.9169	38.928	37.5851	38.6895	41.0819	27.7275	29.993	26.9746	29.5679	27.955	-0.457812	3.61999e-13	AP1S1
ENSG00000133110	0.541452	0.337538	0.352165	0.370881	0.282447	0.0217542	0.0367299	0.0695974	0.0115829	0	-3.76375	3.76001e-13	POSTN
ENSG00000188070	11.219	11.7627	11.6953	11.0728	12.5128	18.1855	16.4657	17.9229	17.5354	14.693	0.540987	3.77981e-13	C11orf95
ENSG00000139174	7.97459	7.40932	7.76034	6.54444	8.18842	5.08045	4.94952	4.52114	4.35609	5.37437	-0.641491	3.81948e-13	PRICKLE1
ENSG00000156970	1.54226	1.71463	1.83684	1.9042	1.25682	0.504566	0.717399	0.552239	0.791822	0.71199	-1.33241	3.82056e-13	BUB1B
ENSG00000174021	63.9115	62.7574	64.4451	74.1818	62.7667	91.2867	103.715	106.412	97.5519	87.4647	0.568171	4.09563e-13	GNG5
ENSG00000160213	34.2451	29.0779	32.0588	31.9317	37.3077	47.379	57.4942	48.6677	55.7657	46.9366	0.637758	4.13089e-13	CSTB
ENSG00000116874	2.81981	3.00021	2.77378	3.05218	3.15757	1.20503	1.80851	1.43334	1.33258	1.73646	-0.981437	4.33639e-13	WARS2
ENSG00000264112	2.95239	3.74651	3.02987	3.25087	3.80315	2.02472	1.94523	1.69028	1.78586	2.05622	-0.822128	4.38371e-13	RP11-159D12.2
ENSG00000157514	7.35244	6.72832	6.33751	7.81613	11.2185	3.59139	3.87404	3.80333	4.05019	4.08916	-1.02501	4.42395e-13	TSC22D3
ENSG00000167037	0.359008	0.594454	0.433582	0.256222	0.884964	0.048336	0.0621795	0.0294551	0.0808855	0.128169	-2.85906	4.60013e-13	SGSM1
ENSG00000126453	5.31058	5.1547	4.76268	4.51862	4.08872	7.80455	9.23764	8.86634	10.6815	7.57777	0.892098	4.81313e-13	BCL2L12
ENSG00000010810	22.4796	22.2851	23.5097	22.3178	18.2918	30.5623	32.027	33.6869	32.7505	29.7788	0.54485	4.82221e-13	FYN
ENSG00000125868	61.869	58.3815	61.7168	64.8185	51.3348	87.32	92.7288	88.3469	89.305	77.8049	0.547024	4.83636e-13	DSTN
ENSG00000048052	0.0898627	0.0707123	0.0866316	0.109805	0.026627	0.759375	0.699706	0.858777	0.718383	0.236738	3.09962	4.8896e-13	HDAC9
ENSG00000105246	0.204811	0.231674	0.0454128	0.139259	0.232633	1.11089	2.29243	2.12254	1.23227	1.47964	3.26027	5.00603e-13	EBI3
ENSG00000178075	2.75968	2.64197	2.2536	2.80699	2.24262	1.46794	1.11296	1.24911	1.21492	1.65489	-0.919801	5.29554e-13	GRAMD1C
ENSG00000139278	2.67253	2.40896	2.86298	2.6224	1.119	10.6681	10.771	11.1544	11.7135	5.60786	2.09576	5.3374e-13	GLIPR1
ENSG00000174718	12.5237	11.6911	13.3097	12.6452	10.165	8.55807	7.45877	8.18237	7.64689	7.82903	-0.603707	5.51522e-13	KIAA1551
ENSG00000198513	0.376974	0.573105	0.441337	0.519473	0.525239	1.30861	1.53434	1.00303	1.4661	1.18074	1.40818	5.76138e-13	ATL1
ENSG00000117226	4.25341	3.86287	4.64091	4.78542	3.81168	7.55182	7.23931	6.48992	8.0566	6.34681	0.741879	5.92506e-13	GBP3
ENSG00000101596	3.7799	3.71288	3.91121	4.22735	4.6114	2.73068	2.70658	2.27358	2.28069	2.74055	-0.66976	6.01621e-13	SMCHD1
ENSG00000243244	3.34308	3.20274	3.58528	3.20087	3.11268	2.19721	2.03061	1.7923	1.96214	2.29753	-0.6763	6.0171e-13	STON1
ENSG00000171634	7.61168	7.77856	8.14517	7.68621	6.2452	5.43624	4.52836	4.29026	4.38891	5.00906	-0.662851	6.02362e-13	BPTF
ENSG00000137812	0.949284	0.795185	0.819184	0.942013	0.582832	0.226134	0.352435	0.352455	0.302553	0.376684	-1.34269	6.1923e-13	CASC5
ENSG00000189221	4.31715	4.12195	5.20022	4.54999	2.39552	1.75244	1.5248	2.05228	1.68298	1.48558	-1.27475	6.59193e-13	MAOA
ENSG00000159346	27.8585	25.0422	26.6075	24.5653	22.5297	34.9746	33.8154	38.5481	36.7684	36.7946	0.515875	6.59478e-13	ADIPOR1
ENSG00000273472	1.79217	1.23768	1.50585	2.43713	1.42851	4.60453	4.31906	4.95583	4.17691	3.9128	1.39179	6.71988e-13	RP11-102N12.3
ENSG00000090889	1.98698	2.04744	2.49551	2.43249	1.21905	0.655554	0.48701	0.489367	0.726018	0.932876	-1.62489	7.19279e-13	KIF4A
ENSG00000118482	8.08342	7.49262	7.47837	6.85161	6.53355	5.14265	4.97637	4.08568	4.47623	4.97823	-0.622219	7.36548e-13	PHF3
ENSG00000106799	3.17002	2.65132	3.35683	3.63155	2.95326	5.05402	5.27829	5.40823	5.77962	4.56689	0.727142	7.37404e-13	TGFBR1
ENSG00000168078	1.97385	1.78619	2.07384	2.72548	2.6214	0.686288	0.803387	0.556222	0.906219	0.82092	-1.57129	7.4197e-13	PBK
ENSG00000198901	3.20095	2.72433	2.56458	3.34422	2.60406	1.36614	1.42876	1.54865	1.64953	1.7748	-0.892202	7.53476e-13	PRC1
ENSG00000149948	5.84328	5.4152	5.6103	5.86624	5.94377	3.46494	3.91751	3.85967	4.14587	2.94035	-0.64642	7.57698e-13	HMGA2
ENSG00000138778	1.00245	1.08984	1.06815	1.05397	0.943589	0.4594	0.425015	0.322135	0.422196	0.64894	-1.17646	7.71261e-13	CENPE
ENSG00000069275	39.079	36.427	38.9535	37.1857	32.497	26.2571	27.9608	25.6192	25.8919	27.5815	-0.465732	7.85329e-13	NUCKS1
ENSG00000146232	6.39358	5.92402	6.46131	6.74312	6.42306	8.72721	9.87521	10.8785	10.2008	11.1364	0.669365	7.95981e-13	NFKBIE
ENSG00000198961	30.3203	26.742	29.5071	30.0813	24.4194	19.3096	17.5546	16.17	18.5488	20.5344	-0.614276	7.9887e-13	PJA2
ENSG00000116560	51.0833	56.9221	49.2643	57.9734	49.1534	37.7676	36.7819	34.1651	35.2582	40.4721	-0.519396	7.99382e-13	SFPQ
ENSG00000140931	32.5084	33.8943	33.1277	32.0909	30.8019	46.0917	52.1136	53.0004	48.8625	40.4568	0.566408	8.31222e-13	CMTM3
ENSG00000253719	13.3754	13.1913	13.0132	14.1325	12.0269	8.74606	9.31672	9.95209	9.6382	9.78447	-0.470307	8.40602e-13	ATXN7L3B
ENSG00000160058	12.1508	12.9215	12.9154	13.0212	11.916	15.9504	16.407	16.4742	17.1267	17.5326	0.408249	9.05265e-13	BSDC1
ENSG00000124145	13.1086	10.0409	10.8676	11.5419	10.3835	17.3317	16.718	22.0241	18.6985	17.4969	0.7233	9.22698e-13	SDC4
ENSG00000162302	14.8689	11.5643	12.9118	13.1981	12.6584	8.05548	7.85478	9.10661	8.54496	9.11159	-0.610575	9.25352e-13	RPS6KA4
ENSG00000035115	1.83719	1.93961	1.77567	1.77233	1.93516	1.2669	1.10247	0.999094	1.10536	1.24603	-0.694297	9.61197e-13	SH3YL1
ENSG00000133704	10.3752	9.74956	11.4835	10.5419	9.84027	7.53419	7.45666	6.2776	6.75292	7.40634	-0.553016	1.02453e-12	IPO8
ENSG00000165355	3.242	3.01098	3.17807	3.29493	2.8038	5.70725	4.68785	5.05	6.25829	4.89906	0.779039	1.04757e-12	FBXO33
ENSG00000259070	1.75859	1.42002	2.42358	1.74148	1.40336	0.574759	0.523066	0.573811	0.612056	0.907939	-1.45148	1.07081e-12	LINC00639
ENSG00000184661	1.26173	1.27878	1.26826	1.37263	0.904461	0.36499	0.479306	0.535195	0.356285	0.376372	-1.52597	1.13561e-12	CDCA2
ENSG00000164190	6.45952	6.39621	6.95773	6.36035	6.24629	4.16488	3.63614	3.28307	3.52084	4.92087	-0.730963	1.15455e-12	NIPBL
ENSG00000100034	44.4704	47.1446	46.8042	43.4762	45.4977	30.5528	31.6753	31.664	29.3614	37.3511	-0.501664	1.18182e-12	PPM1F
ENSG00000112294	1.04715	0.979898	1.08705	0.798299	1.0182	0.419524	0.32692	0.355616	0.274921	0.488069	-1.39885	1.1846e-12	ALDH5A1
ENSG00000108219	20.5782	19.839	20.9926	21.0149	15.4934	32.4141	32.525	33.2809	33.4844	26.2336	0.68986	1.2191e-12	TSPAN14
ENSG00000143457	10.9014	10.3833	11.5079	11.0826	9.97466	5.90933	5.54632	6.91107	5.70344	7.91617	-0.750408	1.30217e-12	GOLPH3L
ENSG00000073849	37.4953	36.6546	39.5891	35.3083	32.2932	23.1599	23.0643	24.7744	22.9338	28.4697	-0.566886	1.32836e-12	ST6GAL1
ENSG00000119285	9.69927	8.89547	9.90412	8.52314	5.98019	5.21488	4.73139	4.41958	4.38527	4.79505	-0.868001	1.38864e-12	HEATR1
ENSG00000134255	2.44597	2.41143	2.48128	2.76299	2.92322	1.58242	1.42335	1.19784	1.26383	1.76289	-0.849263	1.41266e-12	CEPT1
ENSG00000152518	64.0011	64.3389	61.4811	69.2139	71.1059	35.264	33.1953	35.7713	34.7782	51.5856	-0.792523	1.47128e-12	ZFP36L2
ENSG00000112078	17.4082	16.7067	18.0098	17.2054	14.1714	26.3679	26.9241	25.9554	26.3139	21.4633	0.60567	1.50657e-12	KCTD20
ENSG00000137216	14.7535	14.897	14.6269	14.0218	12.4656	19.9317	19.2604	23.2751	19.9522	22.9632	0.575438	1.53072e-12	TMEM63B
ENSG00000113070	8.56114	8.02318	9.11939	7.54414	4.63525	15.6163	15.3168	17.8296	17.133	13.3213	1.06617	1.53759e-12	HBEGF
ENSG00000076321	8.701	7.37029	8.67659	8.21043	9.7601	5.14132	4.92217	4.82725	5.26666	6.12283	-0.701314	1.62204e-12	KLHL20
ENSG00000111642	41.2551	40.8035	44.3059	41.7474	33.5443	29.0801	28.1947	27.9757	27.3937	27.1416	-0.528427	1.65196e-12	CHD4
ENSG00000154783	40.6265	37.7992	41.9896	38.3795	31.7474	26.9463	24.0285	27.0818	25.2653	25.9738	-0.559116	1.66243e-12	FGD5
ENSG00000154678	0.547037	0.585425	0.700344	0.651183	0.230529	1.76307	1.68926	2.08653	1.79963	1.08196	1.63619	1.66493e-12	PDE1C
ENSG00000177200	5.12744	5.2204	5.19779	4.85432	5.06524	3.87165	4.04579	3.6103	3.51692	3.8364	-0.431652	1.68645e-12	CHD9
ENSG00000170043	42.164	35.869	39.2883	39.4467	34.8612	50.9059	56.5572	59.483	63.7756	55.9999	0.582239	1.74831e-12	TRAPPC1
ENSG00000038219	5.45935	5.66054	5.73908	5.50555	5.00661	4.28694	3.88899	3.4847	3.80294	3.80235	-0.505891	1.78557e-12	BOD1L1
ENSG00000151135	18.2976	15.3351	16.4364	18.1383	15.2128	11.3555	12.1785	11.2191	11.2827	11.7867	-0.528101	1.79122e-12	TMEM263
ENSG00000233251	5.31196	6.34515	5.81058	5.66651	7.81681	9.86007	10.558	10.2248	11.2329	10.0685	0.743708	1.88465e-12	AC007743.1
ENSG00000117650	0.70099	0.98035	1.05504	1.02066	0.691662	0.153622	0.237761	0.184304	0.265835	0.138611	-2.18789	1.91684e-12	NEK2
ENSG00000115008	0.0309531	0	0.109812	0	0.0234386	0.78348	0.976375	0.984718	1.31108	0.519372	4.79855	1.92156e-12	IL1A
ENSG00000143153	13.4063	11.2078	12.1856	12.3351	6.08428	39.8892	35.3685	43.1378	38.9094	23.1736	1.70927	1.928e-12	ATP1B1
ENSG00000134243	10.2421	9.95411	10.1886	9.91111	9.54535	7.73939	7.09287	7.49392	6.39248	7.37221	-0.465018	1.93187e-12	SORT1
ENSG00000206418	15.1103	14.566	16.1906	16.3322	16.4667	21.2724	21.097	22.9422	22.3193	21.4886	0.471096	1.94237e-12	RAB12
ENSG00000167842	4.76891	4.3532	4.21117	4.81428	5.01462	2.07082	1.84355	2.56973	2.04482	3.08662	-0.99477	1.98593e-12	MIS12
ENSG00000183688	37.8743	34.7006	38.6157	36.1139	29.4907	22.1087	21.6156	25.24	21.0265	24.7953	-0.622574	1.99286e-12	FAM101B
ENSG00000103005	7.82842	8.02979	6.79937	6.91744	5.2594	11.5885	11.8248	13.6261	11.7941	10.7826	0.776345	2.01195e-12	USB1
ENSG00000136938	55.5095	54.7343	58.2154	55.35	66.7369	40.1571	42.9228	39.9123	40.2656	42.2707	-0.500329	2.07563e-12	ANP32B
ENSG00000186642	7.43308	8.19261	7.75355	7.13705	8.2834	4.25346	3.81898	3.95353	4.34441	5.92209	-0.799243	2.13136e-12	PDE2A
ENSG00000205268	1.64693	1.77079	1.46069	1.69376	1.55553	3.31382	2.91015	3.23515	2.90661	2.22858	0.845358	2.14767e-12	PDE7A
ENSG00000242247	13.3394	13.0918	12.952	13.8033	13.1637	8.297	8.82468	7.46088	6.9635	10.0059	-0.674928	2.16315e-12	ARFGAP3
ENSG00000106089	2.15409	2.40037	2.16314	1.40413	1.69855	3.47615	3.67727	4.41069	4.25013	4.796	1.07198	2.19117e-12	STX1A
ENSG00000100784	0.381766	0.328304	0.340699	0.421342	0.432729	0.201495	0.176135	0.192019	0.173483	0.223252	-0.979035	2.21789e-12	RPS6KA5
ENSG00000136161	6.56516	6.66263	7.43473	6.97747	7.06379	4.8619	4.34031	4.02271	3.767	4.7542	-0.673968	2.27346e-12	RCBTB2
ENSG00000140948	8.8697	9.48358	9.17652	8.71054	6.75682	5.65373	5.26851	5.4289	5.63522	5.00073	-0.670947	2.29608e-12	ZCCHC14
ENSG00000114861	6.84073	5.88477	6.82023	6.36788	4.73433	3.75924	3.40672	4.11589	3.6363	3.61563	-0.724734	2.36924e-12	FOXP1
ENSG00000070018	7.91832	7.63744	7.6265	7.34006	7.15666	5.93923	5.72094	5.45079	5.61441	5.61456	-0.41002	2.4294e-12	LRP6
ENSG00000085491	9.70904	8.20447	8.59333	9.97626	8.17308	14.4769	13.9148	13.793	14.3048	11.6338	0.610008	2.44524e-12	SLC25A24
ENSG00000179431	24.5535	27.0272	25.9658	24.8628	27.005	34.204	35.2508	33.7596	34.5895	33.1944	0.400984	2.44675e-12	FJX1
ENSG00000137054	4.71098	4.64203	5.38532	5.1488	3.56729	2.22399	2.66311	2.24555	2.44389	2.04937	-1.01164	2.47222e-12	POLR1E
ENSG00000196715	12.0923	11.5982	11.6837	12.3772	11.6631	8.26152	8.31256	8.52015	8.36846	9.66196	-0.461832	2.65422e-12	VKORC1L1
ENSG00000187109	29.7715	29.1007	30.0773	33.1618	31.0749	22.2354	24.7353	22.4669	23.6127	21.3079	-0.421851	2.69719e-12	NAP1L1
ENSG00000101773	2.31158	1.48413	1.95856	2.38832	1.76995	0.852205	0.643876	0.87146	0.870211	1.04731	-1.20587	2.70985e-12	RBBP8
ENSG00000164543	10.3345	9.82135	11.0651	11.0331	9.24566	15.1738	14.1969	14.7711	13.8537	14.3947	0.492291	2.9128e-12	STK17A
ENSG00000143799	18.8287	18.0017	19.0189	18.9165	17.6831	13.1888	14.1358	12.9768	13.9651	15.0114	-0.416051	2.95116e-12	PARP1
ENSG00000116017	2.00607	1.84835	1.98949	1.89307	1.23596	3.28899	3.19178	3.45469	3.6253	3.02604	0.890376	3.04724e-12	ARID3A
ENSG00000113721	0.285565	0.275087	0.253273	0.267239	0.279017	0.0166548	0.0468666	0.0444024	0.0620743	0.0429353	-2.68506	3.13751e-12	PDGFRB
ENSG00000165138	4.20423	4.43298	4.14607	3.92657	4.06004	2.98378	2.78106	2.36847	2.80359	2.94456	-0.580473	3.14576e-12	ANKS6
ENSG00000033627	3.46275	3.64946	3.55023	3.48748	3.04018	5.05082	4.70816	4.69203	4.84707	4.86707	0.493062	3.21808e-12	ATP6V0A1
ENSG00000163874	1.49754	1.69873	1.70234	1.54887	1.82077	2.91729	3.34809	4.1074	2.88324	3.2442	0.992736	3.42447e-12	ZC3H12A
ENSG00000197956	173.061	177.072	179.554	195.259	197.391	289.512	353.158	313.767	354.706	231.952	0.742251	3.4284e-12	S100A6
ENSG00000189120	0.161336	0.116798	0.128783	0.190144	0.109951	0.743818	0.590996	0.513261	0.543588	0.661737	2.12355	3.55671e-12	SP6
ENSG00000181751	2.57965	2.7846	2.69651	3.00686	3.19519	4.76393	5.0998	5.11587	4.86021	4.15672	0.746612	3.79698e-12	C5orf30
ENSG00000197355	16.0659	16.2952	14.79	16.3927	19.8173	9.8098	9.59838	10.0175	9.54789	12.5054	-0.695715	3.8749e-12	UAP1L1
ENSG00000253616	3.58198	3.57908	3.24312	3.78859	1.01714	11.873	9.87136	12.7336	12.2124	7.16509	1.83323	3.89431e-12	RP11-875O11.3
ENSG00000185909	34.4868	34.6542	34.8563	33.7233	27.6601	21.0961	21.5758	22.9084	23.6381	22.8899	-0.559971	4.12571e-12	KLHDC8B
ENSG00000059588	7.09832	8.1292	6.39354	7.39742	7.50965	5.41133	4.77777	4.33011	4.58546	4.93897	-0.603056	4.37329e-12	TARBP1
ENSG00000196950	9.32416	8.47208	9.33196	9.71118	7.47077	6.00598	5.76418	5.43362	6.09377	6.11353	-0.590074	4.4056e-12	SLC39A10
ENSG00000145725	2.37167	2.60781	2.64708	2.98876	2.32631	1.64154	1.71214	1.4533	1.75172	1.7566	-0.637891	4.41176e-12	PPIP5K2
ENSG00000170312	3.49544	2.46693	3.45617	3.6541	3.00145	1.46654	1.54863	1.38659	1.5295	1.97998	-1.02118	4.46186e-12	CDK1
ENSG00000122644	12.019	11.1603	11.102	12.8378	15.3363	6.47566	7.66474	7.76009	8.26439	6.55713	-0.767845	4.50546e-12	ARL4A
ENSG00000130449	10.8757	10.0797	10.1653	9.69722	8.63361	16.3464	15.6633	14.6784	15.9805	12.7452	0.609792	4.58566e-12	ZSWIM6
ENSG00000156273	4.77087	5.01114	5.17589	5.39104	4.03197	2.81105	3.17279	2.55425	2.66541	3.37521	-0.741118	4.72008e-12	BACH1
ENSG00000174640	0.298668	0.439193	0.24282	0.473843	0.725598	0	0.0253255	0	0.0119798	0.0812041	-4.20349	4.79505e-12	SLCO2A1
ENSG00000156471	17.9844	18.212	19.5077	17.8193	15.6824	13.1516	12.2318	12.8371	13.1505	12.9387	-0.471399	4.88896e-12	PTDSS1
ENSG00000168916	9.89679	10.3912	9.43473	8.85171	8.94694	7.11783	6.33022	6.18967	6.08022	7.03876	-0.535744	5.11252e-12	ZNF608
ENSG00000168675	0.855198	0.791641	0.82112	0.7433	0.712934	0.450381	0.43909	0.385749	0.347432	0.511965	-0.87564	5.18782e-12	LDLRAD4
ENSG00000134686	28.1478	29.2387	28.8327	28.5134	23.756	37.8099	40.3805	44.1048	41.0521	36.673	0.530716	5.20761e-12	PHC2
ENSG00000143369	0.841371	0.885324	0.833	1.01112	0.800093	1.82189	2.03081	1.84858	2.27916	1.65983	1.14196	5.24888e-12	ECM1
ENSG00000156030	4.70508	5.36962	5.0725	4.90648	3.91726	8.26432	7.59567	8.44189	8.19042	6.36766	0.697567	5.2634e-12	ELMSAN1
ENSG00000175592	13.9363	13.8094	12.6385	12.8871	9.62957	23.1179	22.5119	26.4671	28.0391	17.8629	0.909184	5.35146e-12	FOSL1
ENSG00000189058	0.269321	0.189557	0.424652	0.596841	0.566495	1.29848	1.40067	1.64436	2.10292	1.86898	2.0073	5.68859e-12	APOD
ENSG00000179104	1.87209	1.58688	1.68141	2.1412	1.75854	1.02113	1.00471	0.913805	0.988537	1.15606	-0.828976	5.72553e-12	TMTC2
ENSG00000137727	1.05191	1.07715	1.113	0.677589	0.775575	0.308632	0.328619	0.29355	0.239833	0.481686	-1.50344	5.88051e-12	ARHGAP20
ENSG00000124535	22.9774	23.8927	23.4022	20.6619	23.1262	17.307	16.7546	16.5275	16.9283	17.6887	-0.420681	6.01007e-12	WRNIP1
ENSG00000168883	12.0276	11.7422	11.4495	11.643	10.9972	7.7148	8.12519	8.83664	7.3026	8.56018	-0.512605	6.12969e-12	USP39
ENSG00000112130	3.74968	3.69178	3.80456	4.10647	4.04326	2.54905	2.22822	2.47736	2.29092	2.8802	-0.64187	6.13856e-12	RNF8
ENSG00000260604	0.16762	0.117976	0.165184	0.168846	0.0987209	0.65662	0.435876	0.475799	0.510975	0.390633	1.79495	6.16051e-12	RP1-140K8.5
ENSG00000132471	22.2963	21.7082	20.9847	20.1804	19.7143	26.0891	28.0773	29.3011	28.8019	27.1524	0.411087	6.21562e-12	WBP2
ENSG00000147408	29.1553	26.4648	28.4904	30.3358	29.8474	21.2891	21.0046	21.0849	20.593	23.5643	-0.424168	6.43384e-12	CSGALNACT1
ENSG00000143322	19.3013	18.817	20.114	16.7519	18.1567	26.6341	23.9694	25.0374	24.4573	27.1411	0.450229	6.47778e-12	ABL2
ENSG00000196458	1.46989	1.28068	1.41681	1.15637	1.28322	0.801659	0.7911	0.655817	0.660724	0.820996	-0.82301	6.61812e-12	ZNF605
ENSG00000120253	7.35767	7.20852	6.9993	7.49068	6.71719	5.25667	4.46788	4.70488	4.56962	5.19935	-0.561796	6.75719e-12	NUP43
ENSG00000185950	5.71163	6.14092	5.72495	6.25469	6.62516	3.3083	3.47722	3.20872	3.44521	4.74442	-0.744344	6.76576e-12	IRS2
ENSG00000197713	9.68805	8.31089	8.98987	9.96763	10.1914	5.41677	5.60328	4.93076	4.58227	6.92555	-0.77989	6.92302e-12	RPE
ENSG00000161513	8.84142	9.58777	7.90644	10.2181	8.93586	13.4256	14.4241	16.9765	17.1632	12.8906	0.718924	7.25346e-12	FDXR
ENSG00000166337	6.91592	6.68732	6.21986	6.26986	7.72489	9.26108	9.66795	10.0527	11.2309	10.1624	0.57388	7.41941e-12	TAF10
ENSG00000063854	4.03819	4.00276	4.16709	3.4814	5.33246	7.36068	6.61697	6.87368	7.05449	6.81069	0.721493	7.4414e-12	HAGH
ENSG00000215114	1.65886	1.74397	1.68764	1.80246	2.07816	2.89996	3.07803	2.86915	2.90027	2.94491	0.707094	8.0602e-12	UBXN2B
ENSG00000140511	18.8427	22.2173	21.8083	21.1586	28.0845	11.2153	12.7189	12.6077	12.5178	15.791	-0.790544	8.10954e-12	HAPLN3
ENSG00000186193	2.13567	1.99446	2.273	1.90518	2.31582	0.741362	0.747554	0.889428	0.773023	1.3697	-1.23187	8.4765e-12	SAPCD2
ENSG00000052795	3.2969	3.42139	3.65376	3.37829	3.47221	2.60305	2.38216	1.97115	1.94503	2.18798	-0.63501	8.54341e-12	FNIP2
ENSG00000272933	24.8064	23.9034	24.7677	25.0959	24.1352	16.6975	16.6128	17.5246	18.907	16.1733	-0.514139	8.70603e-12	RP11-47A8.5
ENSG00000167987	6.92308	7.00104	7.39182	7.70621	5.9338	11.9465	9.44335	12.2119	11.7149	10.4465	0.675363	8.82372e-12	VPS37C
ENSG00000106688	6.54483	4.747	5.27969	6.2316	3.11303	2.11091	2.57684	2.29867	2.2004	2.22273	-1.182	8.85105e-12	SLC1A1
ENSG00000176018	7.40158	6.28427	7.06154	7.35176	6.31924	4.1852	4.50084	4.40632	3.88904	5.00293	-0.645531	9.04089e-12	LYSMD3
ENSG00000186469	0.185515	0.102592	0.0457046	0.158841	0.148281	0.559014	0.524357	0.606079	0.615133	0.355476	2.05731	9.33375e-12	GNG2
ENSG00000173812	82.7656	84.7002	83.4655	91.6661	86.5819	106.431	122.421	116.194	125.198	108.396	0.430941	9.53188e-12	EIF1
ENSG00000182985	0.113383	0.162005	0.211709	0.221813	0.234977	0.490911	0.582931	0.615563	0.608937	0.378274	1.49215	9.78551e-12	CADM1
ENSG00000275746	1.80717	1.65285	1.98852	1.76977	1.72702	2.69949	2.76322	3.19555	2.75373	2.78368	0.666582	9.83866e-12	KLF13
ENSG00000010278	87.0878	78.9884	89.312	86.9018	73.0682	54.6945	60.8748	61.1322	60.3348	51.7187	-0.524432	9.9026e-12	CD9
ENSG00000135837	3.25481	3.21993	3.43719	2.97159	2.82667	2.32727	2.11905	2.04309	1.88084	2.14271	-0.578225	1.00685e-11	CEP350
ENSG00000198142	0.94586	0.919809	0.81386	0.575933	0.737613	1.5442	1.93926	1.64676	1.6444	1.68447	1.08592	1.01152e-11	SOWAHC
ENSG00000146826	4.32236	4.71564	4.76512	4.66934	5.84249	7.2305	7.54266	9.34636	7.99135	8.75513	0.745808	1.02991e-11	C7orf43
ENSG00000136950	10.7085	11.4043	11.9689	13.1423	11.9425	15.7225	17.9567	19.3651	18.8465	16.2976	0.574938	1.03561e-11	ARPC5L
ENSG00000196562	60.5693	58.7252	59.7377	53.7114	33.3386	113.142	114.189	116.992	111.424	79.4038	1.0082	1.0381e-11	SULF2
ENSG00000138073	12.2671	12.9479	14.7359	13.3787	11.7465	8.1925	7.37305	8.69729	8.64553	9.39933	-0.620315	1.03945e-11	PREB
ENSG00000137834	4.09223	4.49521	4.52833	4.09277	3.4534	2.80401	2.6484	2.79781	2.53512	2.49781	-0.63607	1.12172e-11	SMAD6
ENSG00000183307	0.0778193	0.176052	0.092026	0.0940662	0.137497	0.59796	0.422316	0.612669	0.47445	0.423162	2.12146	1.13471e-11	CECR6
ENSG00000073584	6.16763	5.7108	4.75071	5.76992	4.93228	3.50491	3.67201	3.51919	3.92184	3.36956	-0.602783	1.15432e-11	SMARCE1
ENSG00000116285	6.42366	6.19668	7.03453	6.83452	4.92365	10.0095	10.3399	9.56908	11.4755	9.58965	0.70034	1.16203e-11	ERRFI1
ENSG00000158604	17.6702	20.2048	19.5089	17.759	19.6149	24.1105	25.9851	27.8643	25.4735	26.2445	0.451873	1.29654e-11	TMED4
ENSG00000113810	4.57108	4.21388	4.16451	4.73608	5.40985	2.80402	2.64995	2.33075	2.63424	3.35525	-0.74596	1.3068e-11	SMC4
ENSG00000166822	4.03528	3.16047	3.73594	3.80807	4.04737	2.12259	1.76488	1.59246	1.86278	2.62874	-0.912604	1.3084e-11	TMEM170A
ENSG00000095637	0.50437	0.593893	0.625192	0.484799	0.901893	0.285654	0.2226	0.117164	0.181344	0.203928	-1.62352	1.32017e-11	SORBS1
ENSG00000123144	101.289	99.9767	102.438	104.156	129.75	70.7086	69.7604	67.6747	76.6964	76.9352	-0.571933	1.3277e-11	C19orf43
ENSG00000240184	2.59007	2.9024	2.96273	2.65535	1.73216	4.63907	4.39661	5.36723	4.74203	4.71604	0.896715	1.38002e-11	PCDHGC3
ENSG00000086205	0.171926	0.046674	0.121987	0.0935189	0.286412	0.777099	0.734752	0.580099	0.926829	0.737226	2.35758	1.41637e-11	FOLH1
ENSG00000189159	24.2064	22.0444	23.4845	23.9004	17.4111	37.9331	43.7949	44.4811	45.3814	28.9735	0.853284	1.42627e-11	HN1
ENSG00000166813	3.52319	4.03287	3.76607	3.57545	4.17103	2.4719	2.15367	2.57271	1.96157	2.41418	-0.721005	1.45073e-11	KIF7
ENSG00000104964	46.845	44.6821	45.576	44.8539	41.3359	58.3108	58.7909	64.1815	63.7073	54.7501	0.424993	1.45819e-11	AES
ENSG00000131475	9.51707	8.29052	8.70769	9.61974	9.07038	12.8803	16.3626	14.2631	15.2431	12.3897	0.653621	1.4702e-11	VPS25
ENSG00000225968	2.80418	2.90893	3.06336	2.66623	2.18815	1.31385	1.44408	1.13738	1.43203	1.60985	-0.971934	1.49084e-11	ELFN1
ENSG00000188343	2.14336	2.35635	2.19163	2.32854	2.16625	1.21699	1.64022	1.28075	1.33007	1.31274	-0.724318	1.49344e-11	FAM92A1
ENSG00000064393	13.7448	13.5234	15.3896	11.799	10.7635	9.02563	7.60099	8.80621	7.97176	7.38519	-0.676808	1.50672e-11	HIPK2
ENSG00000129465	0.545177	0.730882	0.859606	0.677303	0.397535	1.6793	2.11623	2.41373	2.62409	1.2611	1.65596	1.50919e-11	RIPK3
ENSG00000158290	20.9641	22.0003	21.2308	23.2697	16.0021	13.1443	14.3005	13.2782	12.161	13.1707	-0.647116	1.57406e-11	CUL4B
ENSG00000108784	25.825	27.0534	29.1938	27.8966	22.8865	18.637	17.7042	18.0392	18.1819	19.8098	-0.52354	1.57504e-11	NAGLU
ENSG00000079335	1.68606	1.90995	1.57071	1.51756	1.63496	2.90584	2.56728	2.67786	2.7908	2.72507	0.71755	1.59015e-11	CDC14A
ENSG00000103342	21.5977	19.7447	21.2281	22.2934	14.7525	12.9717	11.9811	12.4815	11.9664	12.5278	-0.685266	1.59884e-11	GSPT1
ENSG00000147457	8.42445	8.05408	9.03569	7.82777	9.34634	11.6386	11.6907	12.8838	11.7606	12.2624	0.495597	1.60926e-11	CHMP7
ENSG00000181555	10.381	9.7266	11.0346	9.28634	8.66082	7.10059	6.5769	6.52209	5.53994	6.78372	-0.593319	1.67649e-11	SETD2
ENSG00000074071	47.1657	47.7794	45.1809	50.0945	47.5599	33.915	33.3572	36.8609	36.635	33.0173	-0.452385	1.69402e-11	MRPS34
ENSG00000136485	29.0475	27.6431	29.4077	26.3521	21.4353	17.1292	16.381	16.7632	15.5456	19.7047	-0.646149	1.69787e-11	DCAF7
ENSG00000143622	10.4178	9.1996	9.67121	9.77916	9.55275	13.5426	13.4512	13.407	12.8549	12.5418	0.437282	1.83791e-11	RIT1
novel.38	5.62271	6.91993	5.42078	5.63016	4.40945	3.74547	3.08128	2.87448	2.76776	3.65336	-0.796353	1.84355e-11	-
ENSG00000188690	6.26466	6.93184	5.68792	6.72919	5.71803	4.26755	4.50145	3.83543	3.61081	4.19766	-0.617563	1.87396e-11	UROS
ENSG00000030110	13.0478	11.7266	13.2331	10.832	9.97021	23.3754	19.5672	24.1543	21.0296	15.8756	0.82377	1.87651e-11	BAK1
ENSG00000077150	6.42195	6.60747	6.8141	5.48972	9.3927	11.3722	11.995	15.421	12.6042	16.9343	0.975075	1.8855e-11	NFKB2
ENSG00000132510	6.54001	7.49205	6.7565	6.07688	6.02231	9.71163	9.11567	9.84145	9.05128	9.09409	0.510156	1.8982e-11	KDM6B
ENSG00000198689	4.2015	4.14309	4.45681	4.04944	3.27662	6.44799	6.98801	7.41452	6.90672	5.53004	0.727443	1.95793e-11	SLC9A6
ENSG00000076706	210.954	208.629	216.867	201.8	158.627	293.511	289.312	309.599	293.729	279.362	0.555971	1.98375e-11	MCAM
ENSG00000184216	41.6879	39.2115	40.8942	36.5869	33.3964	26.9905	26.2507	29.1792	27.6188	25.994	-0.494968	1.98752e-11	IRAK1
ENSG00000108256	9.56171	9.05841	9.3296	8.45424	9.42905	6.68274	6.47394	5.84732	6.04893	7.33172	-0.500858	2.03288e-11	NUFIP2
ENSG00000136848	21.5421	21.3408	22.5597	19.2248	17.5438	15.1833	13.3508	14.6917	13.5867	13.9511	-0.529969	2.085e-11	DAB2IP
ENSG00000186479	2.8826	3.31502	3.60859	3.25304	2.33058	1.54723	1.8485	1.46184	1.57536	1.20361	-1.01102	2.1246e-11	RGS7BP
ENSG00000151729	3.24379	3.02136	2.50381	3.26068	4.14178	5.22673	6.06275	6.21501	6.76792	5.27585	0.867033	2.21033e-11	SLC25A4
ENSG00000086666	9.67091	9.27101	10.8292	10.514	10.0862	6.73561	7.39987	6.6664	7.55344	7.36192	-0.4966	2.2137e-11	ZFAND6
ENSG00000114209	7.12648	5.68597	6.35623	6.98853	6.9773	10.3077	10.3972	9.30864	10.7253	9.39405	0.597254	2.21872e-11	PDCD10
ENSG00000198846	0.779829	0.748893	1.03041	0.908974	0.69897	0.215804	0.291492	0.322193	0.214488	0.281877	-1.65331	2.22385e-11	TOX
ENSG00000109881	1.54983	1.33873	0.843487	1.48488	1.54698	0.445784	0.627219	0.373523	0.271264	0.443268	-1.64908	2.25555e-11	CCDC34
ENSG00000115641	27.544	28.7592	29.2518	28.8209	26.3193	35.1967	38.5473	35.7935	39.1713	35.1566	0.386128	2.30249e-11	FHL2
ENSG00000177663	6.03893	6.07711	5.53674	5.83098	5.48743	8.57681	7.38863	8.90098	7.90765	7.75908	0.48548	2.35068e-11	IL17RA
ENSG00000103647	1.72665	2.05356	1.8231	1.81879	3.5364	5.24755	4.48437	5.24732	4.65408	5.39586	1.18589	2.36967e-11	CORO2B
ENSG00000105639	0.231596	0.113521	0.18829	0.253703	0.189986	0.567021	0.510592	0.76283	0.668842	0.494749	1.62392	2.37297e-11	JAK3
ENSG00000102385	0.0562123	0.0436012	0.0854672	0.123763	0.0364848	0.384747	0.375874	0.487717	0.51794	0.179658	2.50169	2.42316e-11	DRP2
ENSG00000164172	4.36472	4.08834	4.54061	4.69086	3.95121	3.12491	2.70484	2.55207	2.72744	2.95722	-0.619098	2.55888e-11	MOCS2
ENSG00000086991	4.04431	4.39177	4.3522	4.34114	3.02164	7.13659	7.18796	6.9036	7.1844	5.67015	0.759792	2.67709e-11	NOX4
ENSG00000107566	11.6914	12.6239	13.3694	13.5732	12.2826	9.12216	9.14758	8.96206	8.64326	10.0732	-0.46765	2.69701e-11	ERLIN1
ENSG00000039123	7.68583	7.88668	7.63224	8.22731	7.76496	5.9541	5.74598	5.32824	5.37833	6.14909	-0.456555	2.71972e-11	SKIV2L2
ENSG00000136682	1.87147	1.80692	1.62512	1.56887	2.21168	0.991014	0.78881	0.762432	0.640732	1.15331	-1.06626	2.78932e-11	CBWD2
ENSG00000104886	7.24529	7.48944	7.15252	7.42633	7.48625	9.30748	11.8849	12.9075	12.1548	10.3745	0.6211	2.81603e-11	PLEKHJ1
ENSG00000253293	5.12547	5.42457	5.22226	5.57921	4.78094	3.47906	3.57316	3.21431	3.17556	3.48835	-0.625091	2.94099e-11	HOXA10
ENSG00000122257	8.28158	9.24113	8.8575	8.11465	8.35654	6.50925	6.22027	6.2344	5.72991	6.71224	-0.44805	2.96168e-11	RBBP6
ENSG00000066322	39.9658	38.3969	39.7727	34.9485	29.1711	53.9326	57.0509	57.7423	60.3608	50.4075	0.617514	2.98905e-11	ELOVL1
ENSG00000124201	8.10894	9.31899	9.70792	8.23206	7.11574	13.9227	12.4484	14.2707	13.1932	11.6273	0.624184	3.00204e-11	ZNFX1
ENSG00000104218	1.61927	1.78719	1.66031	1.62075	2.18299	1.02382	0.895267	0.839171	0.937084	1.09065	-0.89209	3.03063e-11	CSPP1
ENSG00000132205	0.500617	0.425286	0.607112	0.389015	0.727219	1.1083	1.03959	1.59558	1.40643	1.36191	1.29042	3.05964e-11	EMILIN2
ENSG00000176619	26.3365	25.8588	27.5019	23.7994	23.2329	17.3856	17.217	19.5437	18.7584	19.1011	-0.461563	3.12494e-11	LMNB2
ENSG00000114796	9.29541	9.75285	10.4958	9.9912	10.043	7.86708	7.6874	6.81427	7.06059	7.36848	-0.430382	3.33916e-11	KLHL24
ENSG00000081803	7.34978	6.52923	6.76656	7.37643	6.26312	4.36082	4.80322	3.93194	4.29502	5.153	-0.603982	3.39777e-11	CADPS2
ENSG00000150977	5.08526	3.80737	4.43425	4.4258	4.02095	2.77758	2.83233	2.60084	2.94752	2.7145	-0.648703	3.5061e-11	RILPL2
ENSG00000123094	5.57433	5.14587	5.85472	5.80459	3.45002	3.19823	2.66922	2.74516	2.61663	2.57402	-0.902429	3.50684e-11	RASSF8
ENSG00000065534	0.39446	0.378428	0.399834	0.389876	0.229076	0.924989	0.899329	0.920664	1.01927	0.508711	1.25694	3.67362e-11	MYLK
ENSG00000065717	25.7246	26.4613	27.1767	25.3142	22.0192	18.2213	17.064	18.5055	17.2878	19.3814	-0.485219	3.68858e-11	TLE2
ENSG00000187266	5.23136	6.31844	5.41626	5.65248	7.46996	9.0722	9.73369	9.94237	11.2436	10.012	0.729488	3.72023e-11	EPOR
ENSG00000115884	5.61433	5.26259	5.49849	5.00696	2.47879	1.90118	1.69337	1.85115	2.30623	1.19333	-1.41382	3.73968e-11	SDC1
ENSG00000146376	19.695	18.6175	20.5593	23.6869	16.1689	30.1133	29.8732	29.8187	29.4895	29.5599	0.592942	3.75311e-11	ARHGAP18
ENSG00000176788	27.816	25.9229	29.9309	29.5728	24.6335	41.9004	44.6888	49.6863	48.8443	34.831	0.674023	3.78188e-11	BASP1
ENSG00000163808	0.870786	0.833026	0.915748	0.981161	0.631125	0.292383	0.316449	0.371765	0.263456	0.347886	-1.40675	3.78556e-11	KIF15
ENSG00000163297	8.03808	7.51513	8.95576	7.42012	5.83937	12.8457	13.035	14.2772	13.7691	10.233	0.764996	3.81852e-11	ANTXR2
ENSG00000130755	6.08907	6.26881	5.98753	4.64021	8.05224	11.1685	12.9754	10.3365	12.9552	11.3112	0.916078	3.90658e-11	GMFG
ENSG00000164330	0.148984	0.0866695	0.05663	0.067533	0.0564074	0.423281	0.465618	0.4001	0.338061	0.287681	2.22691	4.04852e-11	EBF1
ENSG00000158792	5.19174	4.26668	4.41671	4.51463	5.59614	8.23723	6.95388	8.4013	7.62428	8.8151	0.738074	4.07119e-11	SPATA2L
ENSG00000159899	4.52471	4.23306	3.71132	3.11507	3.452	5.92019	6.6984	6.88735	6.22248	5.94624	0.736713	4.10982e-11	NPR2
ENSG00000158710	137.172	123.485	133.079	137.611	101.789	175.812	186.517	216.236	200.581	183.907	0.605295	4.2354e-11	TAGLN2
ENSG00000163807	8.07584	7.30804	7.68374	7.06075	7.94227	5.69576	5.64793	4.71222	4.97023	5.18582	-0.538464	4.33426e-11	KIAA1143
ENSG00000051620	4.95812	4.81994	4.74655	4.85178	5.22064	7.50654	7.26725	7.47267	7.74309	5.88832	0.544147	4.38766e-11	HEBP2
ENSG00000158156	6.08788	6.83213	6.93002	6.80118	5.20885	10.1835	10.0968	9.82009	9.36763	9.80843	0.6313	4.60305e-11	XKR8
ENSG00000267473	2.00982	2.13352	2.02251	1.92719	2.34138	3.73856	4.20813	4.62029	4.12998	3.99926	0.983232	4.64151e-11	AC005789.11
ENSG00000179144	38.4207	42.2993	44.661	48.0713	70.3153	18.8802	24.6604	18.8222	20.1558	30.5454	-1.10921	4.68917e-11	GIMAP7
ENSG00000140750	12.8108	13.261	12.4718	12.3079	11.5098	9.08423	8.66775	9.23209	8.30915	10.0996	-0.457597	4.70175e-11	ARHGAP17
ENSG00000125148	78.3466	91.233	82.1457	100.944	67.3745	155.742	211.61	192.726	245.508	109.503	1.12342	4.72109e-11	MT2A
ENSG00000131378	17.6612	17.2153	17.5321	17.9083	13.9573	11.0254	9.77688	9.97943	10.9457	12.7679	-0.627929	4.81933e-11	RFTN1
ENSG00000124486	17.7475	16.3286	17.5573	15.8036	11.7025	10.5099	9.32405	9.74623	9.53735	10.2845	-0.679414	4.82612e-11	USP9X
ENSG00000198805	22.3648	21.7478	21.8363	24.1492	15.2514	34.7779	35.267	39.9972	38.7625	30.3098	0.766267	4.8658e-11	PNP
ENSG00000131263	8.34849	8.83283	9.08157	8.96992	8.64483	6.84478	5.97199	6.14965	6.1484	7.02897	-0.448438	4.9113e-11	RLIM
ENSG00000136888	50.1773	51.7436	54.1545	56.9537	51.5002	70.7726	73.9716	75.5703	77.499	64.8081	0.454779	4.98509e-11	ATP6V1G1
ENSG00000092439	3.58761	3.13074	3.24811	3.27179	3.40287	2.31311	2.44634	2.24063	2.16558	2.55917	-0.504921	5.11245e-11	TRPM7
ENSG00000162980	16.5144	14.7849	16.3139	16.8886	13.3428	10.814	10.3793	9.55041	10.0268	11.8447	-0.564386	5.41003e-11	ARL5A
ENSG00000167657	50.6652	44.9095	49.2899	45.781	41.5775	61.0234	59.3953	69.6841	67.1946	69.0913	0.491504	5.47178e-11	DAPK3
ENSG00000150753	22.778	20.7551	24.3765	23.7329	22.6366	30.6781	32.2285	32.249	32.1595	27.7723	0.440402	5.48833e-11	CCT5
ENSG00000246898	0.734916	0.720465	0.896241	0.30537	0.46375	2.43599	1.96299	1.91882	2.41719	1.51288	1.72264	5.6026e-11	LINC00920
ENSG00000100744	3.64207	2.905	3.54941	3.87607	3.55363	5.45265	5.72737	5.21806	5.88962	5.01882	0.639511	5.73938e-11	GSKIP
ENSG00000133243	25.5943	25.7733	24.7503	26.2015	21.5332	18.5377	17.1858	17.9669	17.9305	19.1364	-0.447832	6.10079e-11	BTBD2
ENSG00000128524	63.0779	62.2837	65.2569	58.4696	56.1564	79.2434	96.5731	96.2348	104.6	82.3359	0.588651	6.1227e-11	ATP6V1F
ENSG00000004897	16.6384	14.3765	15.7738	15.6256	12.2781	10.0593	10.4013	10.3931	9.58983	10.4179	-0.553627	6.13269e-11	CDC27
ENSG00000118508	54.0216	46.7346	51.2189	52.5993	41.9704	79.6992	80.145	80.4619	82.8428	61.7391	0.643301	6.17443e-11	RAB32
ENSG00000142669	84.6283	77.8149	81.0985	77.4234	61.3235	107.484	124.993	127.896	127.429	104.282	0.631513	6.2952e-11	SH3BGRL3
ENSG00000184557	3.29443	2.74185	3.39111	3.66249	6.95586	8.17361	10.0322	10.2233	10.417	11.1409	1.31388	6.52378e-11	SOCS3
ENSG00000152284	11.9603	13.0336	12.6026	11.3291	14.1095	17.7328	16.9441	18.4368	17.3493	20.4379	0.527348	6.53506e-11	TCF7L1
ENSG00000144366	1.13608	0.943636	1.06115	1.19414	1.04729	1.68191	1.72563	1.62961	1.8386	1.53995	0.645663	6.58067e-11	GULP1
ENSG00000129534	3.38715	3.73145	4.15167	4.1102	3.28173	2.62454	2.29057	2.089	2.17715	2.34357	-0.694027	6.60028e-11	MIS18BP1
ENSG00000104951	1.97515	1.34633	1.8428	1.76738	0.466175	4.93919	5.19414	6.7757	5.30908	3.39547	1.79831	6.63323e-11	IL4I1
ENSG00000105792	0.438823	0.305964	0.19141	0.391308	0.550185	0.0845413	0.0658799	0.0693511	0.0623266	0.127414	-2.19503	6.72097e-11	C7orf63
ENSG00000148019	1.54342	1.38425	1.49075	1.5155	1.41842	0.881862	1.02059	0.807979	0.771551	1.05452	-0.696254	6.86214e-11	CEP78
ENSG00000119953	4.89108	4.41508	4.66092	4.85228	4.58593	6.08918	7.07628	6.56381	7.46572	6.55059	0.527902	6.871e-11	SMNDC1
ENSG00000119812	15.1101	14.4836	15.6765	15.1157	12.5041	10.2899	9.61115	10.1362	9.24709	11.0716	-0.532446	6.89697e-11	FAM98A
ENSG00000198818	1.99097	2.64502	2.59239	2.68827	3.15959	4.19321	5.90525	4.79842	4.50609	5.19272	0.905387	6.92954e-11	SFT2D1
ENSG00000172159	0.547363	0.614567	0.800121	0.597313	0.606368	1.79599	1.56775	1.51463	1.90277	0.907099	1.27896	6.97504e-11	FRMD3
ENSG00000142634	25.8198	25.6921	27.3465	27.3405	26.2195	18.4332	18.1847	20.5841	20.8297	16.9014	-0.480351	7.06594e-11	EFHD2
ENSG00000076382	1.82623	1.78307	1.95006	1.2744	1.48295	0.499616	0.672397	0.567548	0.497338	1.03039	-1.3467	7.18969e-11	SPAG5
ENSG00000116711	4.55065	4.63534	4.40114	4.41578	2.89178	1.65378	2.14072	2.16043	2.31143	1.5135	-1.09442	7.32352e-11	PLA2G4A
ENSG00000109466	6.11259	6.97577	5.97858	7.03472	7.41868	4.52805	4.11198	3.53566	4.18441	4.6376	-0.675368	7.49732e-11	KLHL2
ENSG00000171867	46.051	43.1961	46.918	46.5365	52.6298	59.5785	67.179	62.224	64.6877	63.0916	0.428031	7.97372e-11	PRNP
ENSG00000143228	0.938646	1.00867	0.832504	1.57782	1.14019	0.265166	0.31837	0.188519	0.301198	0.473954	-1.82914	8.56082e-11	NUF2
ENSG00000170011	4.71362	5.90682	5.19348	4.862	10.7587	0.931164	1.00255	1.0038	0.916141	2.35876	-2.33917	8.65996e-11	MYRIP
ENSG00000139187	5.31421	4.14487	4.46639	5.41426	4.00491	2.12749	2.47196	2.36638	2.6066	2.90153	-0.901866	8.68467e-11	KLRG1
ENSG00000197951	2.80239	3.10486	2.92967	2.80142	2.79982	4.55617	4.17431	4.97179	5.18007	3.82416	0.653332	8.72009e-11	ZNF71
ENSG00000198695	2361.91	2131.35	2233.77	1741.87	1540.07	3364.79	3040.2	3761.27	3227.15	3138.19	0.723993	8.93189e-11	MT-ND6
ENSG00000141179	2.49336	2.26643	2.53867	2.23003	2.73471	3.66905	4.31193	4.52714	4.32691	3.35613	0.717127	8.94599e-11	PCTP
ENSG00000139350	5.24423	4.599	4.58588	4.78104	4.3615	8.09657	7.35977	8.09469	7.4875	5.97342	0.652524	9.04727e-11	NEDD1
ENSG00000024526	0.979929	0.826303	0.632086	1.0701	0.784192	0.261729	0.305933	0.279112	0.321591	0.435977	-1.41697	9.05197e-11	DEPDC1
ENSG00000139154	6.84253	6.7623	6.82294	7.19186	7.6357	4.82008	4.81474	4.5423	4.4106	5.64181	-0.541471	9.18696e-11	AEBP2
ENSG00000119596	8.14512	8.81449	8.61166	8.79056	7.18174	6.09667	5.60776	5.62819	5.29679	6.4145	-0.515796	9.41279e-11	YLPM1
ENSG00000110651	41.4436	40.376	41.2444	39.4745	31.0457	53.3157	57.7594	61.5028	59.2748	53.1631	0.558305	9.43518e-11	CD81
ENSG00000163291	1.30397	1.30951	1.33046	1.4849	1.02754	1.97422	2.39478	2.11556	2.29623	1.89249	0.726876	9.51928e-11	PAQR3
ENSG00000058063	10.3163	9.08969	10.513	9.99427	9.8257	6.99283	6.45259	5.54127	5.83615	7.77737	-0.609094	9.7724e-11	ATP11B
ENSG00000133895	13.7342	13.7035	13.829	13.1811	12.8152	8.90229	8.52367	9.98616	9.316	10.7965	-0.500355	9.93448e-11	MEN1
ENSG00000196204	2.45795	2.60218	2.71972	2.69348	2.79185	3.75363	3.66661	4.26751	4.0087	4.23774	0.585962	1.00419e-10	RNF216P1
ENSG00000147394	2.5549	2.992	3.0294	2.30384	2.00707	5.28619	6.10307	5.54509	7.04967	3.52789	1.09495	1.00864e-10	ZNF185
ENSG00000105254	16.1692	16.3313	15.7609	15.5368	15.2823	21.8718	25.2424	22.3717	23.2149	19.2555	0.501441	1.01047e-10	TBCB
ENSG00000270069	2.07738	2.73436	1.77966	2.26854	2.07357	3.75588	3.91536	4.48325	3.77235	4.07106	0.871822	1.02057e-10	MIR222HG
ENSG00000121858	8.2346	8.99345	7.63923	8.90694	14.6355	2.49846	2.48482	2.00743	2.24145	4.641	-1.80311	1.02204e-10	TNFSF10
ENSG00000123080	1.80311	1.21928	1.38833	1.8682	1.50041	0.537365	0.423401	0.61126	0.629459	0.794242	-1.37201	1.02504e-10	CDKN2C
ENSG00000157617	8.3002	7.87764	8.34452	7.78119	9.00526	6.32188	6.26045	6.366	5.89336	6.05592	-0.419687	1.05251e-10	C2CD2
ENSG00000074603	6.00719	5.75652	6.24158	6.00638	6.41614	4.31295	4.52054	4.52493	4.27052	4.9276	-0.432421	1.07331e-10	DPP8
ENSG00000131386	2.32816	2.38981	2.17789	2.22618	3.03473	1.2565	1.20217	1.07197	1.25999	1.6304	-0.922292	1.07424e-10	GALNT15
ENSG00000181284	5.68199	4.05195	4.7382	4.75926	3.78813	7.31392	7.79265	7.65085	8.94789	8.06015	0.793303	1.07716e-10	TMEM102
ENSG00000050405	13.1967	12.9121	13.5321	13.4453	10.1742	18.7132	20.28	18.5916	19.5669	16.881	0.572525	1.08984e-10	LIMA1
ENSG00000184232	13.2068	13.6746	14.1369	13.2867	12.054	18.6569	21.4847	22.5302	22.6972	16.6915	0.621178	1.0946e-10	OAF
ENSG00000153015	3.97279	4.78814	4.75522	4.66941	3.99333	2.73326	3.05868	2.6606	2.65679	2.37606	-0.718568	1.0984e-10	CWC27
ENSG00000187514	213.698	206.097	207.468	218.102	260.87	147.825	160.748	160.214	157.136	167.511	-0.479602	1.15982e-10	PTMA
ENSG00000092820	26.3804	25.7771	28.8584	29.3733	25.145	38.3235	36.111	39.2948	37.4205	33.8154	0.448877	1.16734e-10	EZR
ENSG00000107175	20.3975	17.1575	22.4316	18.7713	16.7932	29.9793	27.1281	34.6429	31.2987	27.341	0.655293	1.18025e-10	CREB3
ENSG00000151883	0	0.00591625	0.0231941	0	0.00495063	0.177305	0.119745	0.252108	0.176223	0.0853225	4.55071	1.18897e-10	PARP8
ENSG00000029725	12.0999	11.0771	12.0709	11.7088	10.1381	8.88167	8.14323	7.52098	8.31452	7.9575	-0.483089	1.19598e-10	RABEP1
ENSG00000101447	4.43608	5.02392	3.72241	3.87719	4.64647	1.96908	1.70284	1.66453	2.55714	2.64953	-1.04067	1.20083e-10	FAM83D
ENSG00000155465	8.23886	8.24402	9.36414	8.06164	7.60676	11.641	10.8736	12.5253	11.2616	11.777	0.485157	1.23922e-10	SLC7A7
ENSG00000173706	27.8544	27.2922	29.6926	24.832	22.1907	15.3836	14.1344	15.3581	13.6462	20.5995	-0.736655	1.24016e-10	HEG1
ENSG00000164733	139.03	136.48	143.655	132.983	92.369	219.568	222.649	253.341	241.092	175.574	0.787204	1.26184e-10	CTSB
ENSG00000137804	3.3158	3.68344	3.63043	4.45724	3.22078	2.19125	2.07091	1.96202	1.87116	1.8972	-0.872255	1.26556e-10	NUSAP1
ENSG00000154175	0.676727	0.980905	0.918895	0.852398	0.44895	0.303172	0.286407	0.323308	0.340141	0.223304	-1.3915	1.29538e-10	ABI3BP
ENSG00000160190	2.03582	1.90338	1.60879	1.53074	2.02378	3.13996	2.93548	3.12528	3.44589	2.61729	0.745348	1.30552e-10	SLC37A1
ENSG00000100403	21.5192	23.1249	23.3572	20.4773	19.587	30.5209	27.509	33.7946	29.7534	29.0795	0.479553	1.31132e-10	ZC3H7B
ENSG00000137269	4.00078	3.42603	3.71507	3.46881	3.50732	2.23312	2.47262	2.4591	2.01616	2.35282	-0.650876	1.3247e-10	LRRC1
ENSG00000149257	123.287	125.126	130.717	121.328	111.795	146.537	161.322	164.912	158.39	162.556	0.374563	1.4119e-10	SERPINH1
ENSG00000278730	10.691	9.16542	9.48211	9.20261	8.57279	6.61266	6.34392	6.27074	5.91508	6.63004	-0.565929	1.44296e-10	LINC00674
ENSG00000165617	0.219636	0.185504	0.350639	0.278765	0.221753	1.01922	0.953549	0.959875	0.972596	0.450431	1.79314	1.45382e-10	DACT1
ENSG00000236698	30.8318	22.7034	22.6538	24.6632	18.6545	11.4766	10.3037	12.0932	9.6025	14.0887	-1.04864	1.47189e-10	EIF1AXP1
ENSG00000102471	5.70211	4.61813	5.2625	5.18177	4.60634	7.935	7.24226	7.25505	8.06999	6.92654	0.563162	1.47688e-10	NDFIP2
ENSG00000127666	7.76353	7.58123	7.21248	6.92692	5.30206	10.5495	10.4746	11.6055	11.7307	11.4052	0.684215	1.48507e-10	TICAM1
ENSG00000070495	2.87473	2.28247	3.01856	2.7959	2.65223	4.14206	3.70967	4.54459	4.50627	4.3739	0.644177	1.50261e-10	JMJD6
ENSG00000071246	93.763	95.4353	100.702	84.8848	135.461	50.7398	45.3939	50.3667	46.2161	74.8872	-0.931121	1.51994e-10	VASH1
ENSG00000141424	5.41025	5.00898	4.8618	5.14765	3.7047	8.05455	9.13889	9.08871	9.16164	6.54138	0.800924	1.5577e-10	SLC39A6
ENSG00000180628	5.60402	5.40071	5.66532	6.243	6.31734	3.9927	4.05927	3.60929	4.24417	4.44924	-0.522753	1.57258e-10	PCGF5
ENSG00000184481	5.24505	4.67735	4.51661	4.59945	6.00811	2.15523	2.46474	2.27999	2.09312	3.60924	-0.991478	1.58164e-10	FOXO4
ENSG00000146386	34.3514	32.6224	33.4796	40.1325	32.2763	53.0931	60.1519	56.6195	58.7007	43.0023	0.651731	1.58976e-10	ABRACL
ENSG00000080546	4.10822	3.67116	3.34761	4.27147	3.27613	6.29026	6.3096	5.95309	5.88277	5.06228	0.661562	1.60993e-10	SESN1
ENSG00000086544	7.71063	8.20786	9.56042	8.17006	7.11824	12.4308	12.3518	14.3237	12.4148	11.1709	0.621394	1.6163e-10	ITPKC
ENSG00000115827	2.69606	2.77384	2.66534	2.45977	2.36662	1.7697	1.84346	1.63065	1.65311	1.58477	-0.610743	1.62396e-10	DCAF17
ENSG00000136193	50.836	45.5798	54.5487	46.4124	34.1305	30.7189	28.5692	28.7128	27.761	29.2238	-0.674881	1.63182e-10	SCRN1
ENSG00000106086	3.58198	3.11763	3.66781	3.47288	3.72011	5.69478	5.08754	4.64619	5.37587	4.67818	0.536915	1.67705e-10	PLEKHA8
ENSG00000132906	1.93402	1.99856	1.82599	1.82122	2.20147	3.3275	3.61848	3.78909	3.55544	2.58217	0.783995	1.68862e-10	CASP9
ENSG00000196975	6.27301	5.2878	5.57539	6.11847	5.92638	7.87574	8.69007	7.71062	8.17045	7.54212	0.454571	1.69295e-10	ANXA4
ENSG00000048028	5.13861	4.72288	5.00615	3.91862	4.86606	2.88901	2.50324	2.58219	2.78875	3.51491	-0.727035	1.69839e-10	USP28
ENSG00000153551	12.0762	11.7528	11.4257	11.4089	8.77284	17.7933	18.1377	19.5158	18.1887	14.4596	0.669412	1.70571e-10	CMTM7
ENSG00000080345	4.1909	3.88088	4.3365	4.34405	3.38175	3.00336	2.71037	2.46668	2.50843	2.81701	-0.57503	1.77882e-10	RIF1
ENSG00000170955	27.6818	30.423	26.6092	31.5124	29.1496	42.5128	48.8127	51.174	55.378	36.5443	0.688974	1.78068e-10	PRKCDBP
ENSG00000171307	13.9691	13.5688	14.5491	12.8771	10.5616	7.56906	8.12854	8.66894	8.47146	9.21877	-0.638435	1.80631e-10	ZDHHC16
ENSG00000167552	120.381	102.953	116.262	121.226	58.4567	206.963	198.033	229.769	221.04	178.752	0.994571	1.81287e-10	TUBA1A
ENSG00000064115	15.9457	14.8122	16.2272	15.3912	15.9927	20.1013	22.4024	20.7843	21.2755	19.2622	0.405258	1.84437e-10	TM7SF3
ENSG00000101413	6.35851	5.88353	6.51768	5.52658	5.99824	3.79609	3.41103	3.25468	3.1926	4.7374	-0.718472	1.86527e-10	RPRD1B
ENSG00000102144	48.1154	44.4967	48.3494	48.6177	37.3905	60.8703	72.3209	68.729	67.7773	61.2746	0.544406	1.87167e-10	PGK1
ENSG00000109445	7.31069	6.94407	7.28875	9.33055	9.16756	4.49963	4.801	4.69852	4.19266	5.36493	-0.766927	1.90438e-10	ZNF330
ENSG00000171033	11.4928	10.1038	12.1018	11.3098	8.65544	19.1577	21.1038	20.0092	21.3616	13.33	0.82392	1.9112e-10	PKIA
ENSG00000170144	46.4776	44.4059	47.6396	47.6288	57.3093	32.4894	33.8756	31.4221	32.1849	38.3888	-0.532347	1.96453e-10	HNRNPA3
ENSG00000087088	46.7606	42.9128	46.2287	44.4889	51.0729	58.4447	66.8198	68.5494	72.8058	60.2199	0.497333	1.96552e-10	BAX
ENSG00000169032	13.7995	12.6141	12.9526	14.7302	12.2241	16.9017	18.6152	18.294	19.7326	18.3581	0.471321	1.97536e-10	MAP2K1
ENSG00000114520	12.0131	10.8051	11.0851	12.717	10.916	7.06433	7.77877	7.72071	7.2424	8.80038	-0.574892	1.98539e-10	SNX4
ENSG00000065328	0.711206	0.850846	0.791151	0.743121	0.675464	0.359603	0.367973	0.174312	0.208875	0.258448	-1.46107	2.04948e-10	MCM10
ENSG00000002834	53.4074	49.9896	55.9977	47.0423	40.2936	71.1575	69.3702	77.4904	74.0988	68.7416	0.548692	2.09746e-10	LASP1
ENSG00000167930	14.7606	14.5221	14.6302	13.8384	10.6369	8.34762	8.04364	9.29322	7.89263	9.70349	-0.658917	2.12912e-10	ITFG3
ENSG00000120306	12.9082	12.171	11.6353	13.7209	11.8022	17.653	20.3907	17.9262	19.4068	16.1279	0.556352	2.16961e-10	CYSTM1
ENSG00000157216	9.88618	9.99341	9.64954	9.69242	10.2101	13.3601	14.8334	16.2118	15.6437	12.0766	0.544574	2.17806e-10	SSBP3
ENSG00000119718	8.86088	9.46045	8.66191	9.19322	9.84519	11.6224	11.989	12.8482	13.2831	12.2324	0.428375	2.20352e-10	EIF2B2
ENSG00000100221	22.1579	22.1555	23.8578	20.5978	21.1056	29.153	28.7631	30.0051	29.5964	26.7471	0.393028	2.20882e-10	JOSD1
ENSG00000171864	1.30498	0.747409	0.922997	1.36278	3.07707	0.209059	0.268934	0.20702	0.206724	0.508149	-2.40763	2.21488e-10	PRND
ENSG00000019582	0.165187	0.280279	0.274702	0.31823	0.390888	1.32529	0.651325	1.25406	1.35165	0.80842	1.90209	2.23304e-10	CD74
ENSG00000114742	6.23377	5.68083	5.87149	5.9937	6.12987	4.11932	4.46698	3.77504	4.13307	4.73885	-0.494324	2.24789e-10	WDR48
ENSG00000109906	1.19685	1.46587	1.47331	1.42178	2.53918	0.71819	0.493437	0.586852	0.546282	0.807912	-1.3625	2.29703e-10	ZBTB16
ENSG00000003249	10.5654	10.5913	9.90044	9.3584	8.3962	15.6091	15.6512	15.854	15.5258	12.1806	0.617371	2.3203e-10	DBNDD1
ENSG00000134769	0.718119	0.767571	0.756913	0.773693	0.299474	1.81581	1.78443	1.64044	1.8034	1.20302	1.31812	2.34675e-10	DTNA
ENSG00000134717	5.7207	5.24596	4.92856	5.39413	5.18338	7.59931	8.13167	7.17788	7.8297	6.68629	0.500003	2.3602e-10	BTF3L4
ENSG00000164924	84.4417	77.095	82.9426	86.4396	57.8548	48.9146	49.9834	49.3482	47.0508	54.5878	-0.637556	2.3645e-10	YWHAZ
ENSG00000086061	51.9693	48.1616	55.0634	54.7122	53.066	64.1349	65.9172	69.4626	68.969	69.839	0.363362	2.39828e-10	DNAJA1
ENSG00000171475	6.82291	6.69424	6.72614	6.25157	5.98775	9.41643	8.09555	9.14457	8.59387	8.72926	0.438525	2.40137e-10	WIPF2
ENSG00000115415	20.6911	21.0337	22.5803	22.3916	19.9611	17.5558	16.2022	15.3712	16.217	15.5619	-0.398295	2.42089e-10	STAT1
ENSG00000125266	96.5901	89.8075	96.1637	85.6162	62.3829	51.8786	50.1468	52.0566	48.3501	60.7501	-0.709955	2.42659e-10	EFNB2
ENSG00000243317	6.37766	7.85407	6.56026	8.09144	6.04001	10.9272	11.6561	10.8739	12.9724	9.69569	0.684884	2.65788e-10	C7orf73
ENSG00000188157	49.7635	57.7407	55.9197	50.8102	44.0963	74.9343	71.2814	73.9492	73.1197	67.4783	0.481918	2.69353e-10	AGRN
ENSG00000156256	4.74551	4.72272	5.0691	5.52691	4.74754	3.16264	3.31315	2.7271	2.98995	3.7779	-0.635199	2.75666e-10	USP16
ENSG00000167977	10.5537	10.1244	10.2298	10.3869	9.81115	13.2072	13.9859	13.7509	13.6016	12.974	0.402414	2.79824e-10	KCTD5
ENSG00000087903	1.62662	1.43272	1.38497	1.19284	0.908739	0.581647	0.470798	0.634218	0.62635	0.748047	-1.09186	2.82978e-10	RFX2
ENSG00000137824	7.67489	6.95684	7.21748	6.98123	7.48603	9.27399	9.83709	10.0759	10.5193	9.37145	0.434163	2.88171e-10	RMDN3
ENSG00000113083	19.6463	21.0644	20.2933	19.3044	21.1407	15.5646	15.7089	14.9873	16.6672	16.1621	-0.359597	3.02196e-10	LOX
ENSG00000263528	3.7806	3.89197	4.12215	3.74187	2.52135	6.49039	6.59975	8.4763	7.46248	5.351	0.931117	3.05463e-10	IKBKE
ENSG00000205250	26.8337	25.6943	25.769	27.0891	25.4894	17.0566	17.9663	19.4103	19.0468	21.7632	-0.458238	3.07995e-10	E2F4
ENSG00000139687	15.2292	14.331	14.2538	15.1495	13.1137	10.0291	10.4104	9.22601	9.68471	11.7326	-0.496043	3.15887e-10	RB1
ENSG00000111962	0.374612	0.273804	0.255577	0.235119	0.130923	0.716369	0.718381	0.930629	1.2067	0.671553	1.75761	3.4287e-10	UST
ENSG00000158109	45.509	44.0905	45.5562	39.1837	32.646	68.9851	63.0731	69.76	65.2293	55.0405	0.638524	3.47588e-10	TPRG1L
ENSG00000119541	11.3205	11.0163	12.3917	12.0725	10.7528	16.5557	16.5887	15.0702	15.3859	14.6149	0.442903	3.49792e-10	VPS4B
ENSG00000115594	1.22522	1.06674	1.07844	1.06869	1.06132	0.444716	0.566687	0.483202	0.48251	0.744118	-1.01406	3.53558e-10	IL1R1
ENSG00000213190	5.54995	5.79608	5.70937	5.63117	3.65283	9.21751	10.8678	12.1005	12.5647	7.30919	0.984107	3.61507e-10	MLLT11
ENSG00000088205	7.56173	7.40357	7.56819	7.78153	7.35561	5.4353	5.53005	5.39267	5.57035	6.29955	-0.415876	3.61799e-10	DDX18
ENSG00000029363	18.4214	17.0284	18.7279	18.7392	17.2157	14.3387	13.5277	13.5459	13.5333	14.9968	-0.365459	3.7128e-10	BCLAF1
ENSG00000145431	1.92778	1.56367	1.89745	1.85426	1.46867	2.92222	2.52375	2.87833	3.16842	2.84898	0.723456	3.96617e-10	PDGFC
ENSG00000126768	5.18359	5.10876	6.28164	5.14137	6.06263	7.91042	8.85177	8.04001	8.8931	9.30532	0.627771	3.9886e-10	TIMM17B
ENSG00000179965	5.59018	5.34695	4.83091	5.87653	4.55867	3.22502	3.6625	3.27033	3.23499	3.45921	-0.635366	4.10356e-10	ZNF771
ENSG00000160014	93.462	88.9081	88.2839	87.738	85.6652	109.87	108.692	123.822	115.791	107.848	0.350261	4.20116e-10	CALM3
ENSG00000123091	42.7064	38.0936	41.1083	43.4897	30.9034	24.7287	26.6133	25.6809	26.0901	28.0714	-0.580927	4.21906e-10	RNF11
ENSG00000120068	3.3337	3.94498	3.09887	4.0975	4.7332	7.44718	7.43667	6.45852	7.28242	5.94632	0.843065	4.23252e-10	HOXB8
ENSG00000163932	2.76839	3.04827	3.51989	3.24691	3.7968	5.30273	4.84593	5.15103	5.2741	5.61246	0.672836	4.28936e-10	PRKCD
ENSG00000188643	264.639	262.318	255.419	282.946	216.899	336.156	373.697	381.845	381.93	332.407	0.494295	4.38407e-10	S100A16
ENSG00000134352	65.6028	61.357	63.6942	65.69	45.8242	42.2015	42.2465	39.3363	38.0948	38.3598	-0.593502	4.46991e-10	IL6ST
ENSG00000143543	56.12	59.6926	58.31	62.3916	59.2677	39.6482	44.0915	39.0194	40.9941	49.2008	-0.47419	4.51479e-10	JTB
ENSG00000129636	7.79286	7.31996	7.69962	7.73991	6.93254	9.77539	10.5211	9.92709	10.3038	9.18106	0.407776	4.65801e-10	ITFG1
ENSG00000143537	54.4707	51.7227	52.1194	46.938	42.6986	70.1474	68.6654	79.6486	73.5843	63.3244	0.519464	4.86389e-10	ADAM15
ENSG00000111144	15.716	15.1284	15.6049	17.3375	17.8882	11.3286	12.0142	11.486	11.2715	13.2661	-0.46065	4.88382e-10	LTA4H
ENSG00000170345	1.05581	0.845187	1.00845	1.03081	0.891738	0.348739	0.247921	0.195738	0.293187	0.473177	-1.62403	4.89169e-10	FOS
ENSG00000130294	0	0.00481458	0.0283127	0.0144702	0.0322302	0.12986	0.135343	0.138485	0.107556	0.12399	2.93044	4.9461e-10	KIF1A
ENSG00000107643	5.89234	5.59782	5.66204	5.87423	5.72338	4.45019	4.67566	4.364	4.38404	4.35347	-0.371268	4.95718e-10	MAPK8
ENSG00000160953	4.51343	4.51806	4.38683	4.2125	4.27969	5.96372	5.35803	6.10953	5.67783	5.80218	0.400943	5.04938e-10	MUM1
ENSG00000175745	7.16756	7.94478	8.07817	8.61196	7.83312	4.06026	5.06388	4.85798	4.44425	6.18549	-0.687983	5.17387e-10	NR2F1
ENSG00000271601	15.7621	16.1194	16.7962	15.5492	15.818	19.9155	20.5994	20.3773	20.5073	19.6269	0.335614	5.2413e-10	LIX1L
ENSG00000150093	215.367	201.671	219.223	228.079	166.859	309.443	322.49	302.908	321.047	263.639	0.559342	5.2943e-10	ITGB1
ENSG00000196182	10.7378	10.2172	10.1703	9.14832	9.29768	12.9178	12.6016	14.5921	13.5523	13.7044	0.443529	5.44984e-10	STK40
ENSG00000255690	2.67773	2.82098	3.59194	2.97108	1.77546	1.28861	1.23357	1.32282	1.26963	1.52749	-1.05635	5.45153e-10	TRIL
ENSG00000186665	21.7647	23.6685	20.2687	21.5345	23.0732	13.0942	14.8915	12.4083	13.113	17.5602	-0.634568	5.4614e-10	C17orf58
ENSG00000023287	8.55583	7.96115	8.74458	8.8367	8.01505	6.25934	6.17582	5.75955	5.81779	6.87304	-0.446672	5.50586e-10	RB1CC1
ENSG00000105854	29.8225	30.2443	27.3151	32.5179	28.3288	38.3875	42.1266	39.7749	39.0522	36.9897	0.405575	5.5213e-10	PON2
ENSG00000107562	0.0324557	0.0881099	0.047976	0.0588475	0.0819213	0.400977	0.198149	0.427609	0.281193	0.322717	2.38251	5.72152e-10	CXCL12
ENSG00000213160	3.25798	3.08862	2.9319	3.29984	2.76525	1.92031	2.05222	2.02485	2.01046	2.01357	-0.612736	5.74944e-10	KLHL23
ENSG00000139618	0.508898	0.499296	0.546374	0.427364	0.429973	0.295395	0.163523	0.216896	0.201115	0.209729	-1.14351	6.09599e-10	BRCA2
ENSG00000172716	13.727	13.3269	13.7051	12.2155	13.0576	6.83544	6.47503	6.03922	6.01999	10.7778	-0.868901	6.15731e-10	SLFN11
ENSG00000073350	0.307566	0.368592	0.213806	0.263762	0.642044	0.849144	0.989632	1.14595	0.976265	1.50328	1.59587	6.23788e-10	LLGL2
ENSG00000082397	14.0066	12.6371	13.5617	14.0573	9.54332	7.71592	8.30216	7.93474	7.95787	9.05341	-0.638859	6.26447e-10	EPB41L3
ENSG00000102007	36.7017	36.1428	34.1015	38.8652	30.127	50.8824	58.5287	55.9964	61.0624	44.3712	0.622964	6.41684e-10	PLP2
ENSG00000107719	34.597	36.1926	34.1155	29.4023	43.2368	21.1113	19.2394	20.4681	19.5078	27.4475	-0.720262	6.63367e-10	PALD1
ENSG00000166086	30.5022	31.2913	29.5775	29.9162	31.1889	36.7215	36.8666	36.7304	38.3497	36.1802	0.27759	6.67439e-10	JAM3
ENSG00000166908	1.43486	1.2263	1.09585	1.22855	1.70523	2.26993	2.75782	2.32464	3.16542	3.06522	1.01716	6.9681e-10	PIP4K2C
ENSG00000012048	0.59754	0.682671	0.71546	0.562034	0.746584	0.290343	0.28881	0.208818	0.21571	0.403838	-1.23168	7.05123e-10	BRCA1
ENSG00000151468	1.58872	1.48613	1.4249	1.29466	0.621788	0.419562	0.454096	0.464638	0.29213	0.199683	-1.80737	7.23736e-10	CCDC3
ENSG00000055163	3.17386	3.31614	3.36584	3.04067	2.61969	4.30654	4.7653	4.53869	4.81919	4.11082	0.539851	7.23975e-10	CYFIP2
ENSG00000003096	4.40618	4.64329	4.17514	4.44694	3.60027	2.65544	3.12309	2.5686	2.72806	2.96644	-0.598224	7.40724e-10	KLHL13
ENSG00000105538	47.7593	47.965	48.2333	45.0791	37.7246	61.6099	61.7701	70.1625	62.1756	61.7881	0.485985	7.45242e-10	RASIP1
ENSG00000087053	11.8724	10.2964	11.7592	10.7147	9.28306	16.1718	15.109	15.8683	15.4629	13.8316	0.504458	7.57e-10	MTMR2
ENSG00000165480	1.46674	1.46392	1.68349	1.40794	1.11066	0.604465	0.680387	0.478261	0.519104	0.643422	-1.28271	7.64073e-10	SKA3
ENSG00000263155	1.95102	2.53214	2.02639	2.46696	3.53792	1.13713	1.09711	1.16316	0.939082	0.693983	-1.32054	7.7701e-10	MYZAP
ENSG00000100815	5.21036	5.70158	5.80176	5.78098	5.03979	4.31476	4.05693	3.47087	3.56353	3.94707	-0.508109	7.79751e-10	TRIP11
ENSG00000259207	8.36392	8.4082	8.02857	6.8501	4.5093	3.82781	2.84702	3.49066	4.0474	3.97508	-0.98939	7.8653e-10	ITGB3
ENSG00000157456	3.4034	3.33471	3.081	3.57488	2.32833	1.69747	1.48077	1.44817	1.64945	1.77228	-0.96069	7.86647e-10	CCNB2
ENSG00000111652	10.7708	12.174	10.658	11.9473	9.62727	7.1594	6.38244	6.96305	6.68877	8.52451	-0.625821	8.00112e-10	COPS7A
ENSG00000147044	2.14173	2.45795	2.80225	2.68323	2.15135	3.72547	3.73594	4.03311	3.6787	3.32943	0.596667	8.1031e-10	CASK
ENSG00000105855	0.468487	0.361139	0.403969	0.491577	0.285773	0.941133	0.728297	0.903278	0.893632	0.626769	1.03086	8.11462e-10	ITGB8
ENSG00000130787	40.7407	41.1397	41.7907	39.889	45.9141	25.0383	24.9617	25.0593	23.5084	35.415	-0.644734	8.19992e-10	HIP1R
ENSG00000160588	2.12078	2.12906	1.73402	2.38831	2.14541	3.84934	4.40026	3.41818	3.68443	3.01178	0.803286	8.58147e-10	MPZL3
ENSG00000197381	5.9099	6.88112	6.58113	5.85788	6.45416	4.77859	4.17608	4.54523	3.97612	4.89088	-0.502243	8.67828e-10	ADARB1
novel.53	0.840951	0.951248	0.745856	0.871305	0.955189	2.00914	1.95589	2.17154	2.05278	1.70783	1.17788	8.74798e-10	-
ENSG00000013810	4.32051	4.68441	3.84982	4.20907	4.24014	2.95888	2.47996	2.81559	2.70492	3.2483	-0.582987	8.77461e-10	TACC3
ENSG00000113369	15.1636	16.3144	15.9307	16.0906	13.1572	11.1903	11.6874	8.83775	9.44079	10.2599	-0.575788	9.24027e-10	ARRDC3
ENSG00000198668	67.7666	63.0225	67.8681	65.9304	56.8263	81.2463	84.1319	83.2372	82.1486	82.0539	0.361253	9.30556e-10	CALM1
ENSG00000198113	30.891	32.0274	32.7818	31.3963	21.2312	45.5057	45.9315	54.0289	48.2145	43.9846	0.68058	9.34053e-10	TOR4A
ENSG00000172890	7.25076	7.5629	6.7892	6.91184	6.52141	9.07567	9.41569	9.28049	8.62881	8.78554	0.367531	9.36947e-10	NADSYN1
ENSG00000083720	8.38656	6.9225	7.81359	8.45579	7.2052	5.22904	5.47111	5.39501	5.43255	5.55285	-0.517037	9.38203e-10	OXCT1
ENSG00000173559	1.51908	1.89608	1.57115	1.79594	1.68397	2.62164	2.21441	2.41933	2.77801	2.51696	0.567889	9.5608e-10	NABP1
ENSG00000180776	14.8497	14.1103	14.7396	14.5104	14.2813	11.1316	12.2777	11.2797	10.6958	11.1269	-0.359434	9.583e-10	ZDHHC20
ENSG00000007923	7.60529	7.32699	7.76625	7.77426	6.98321	5.27328	5.02751	5.34921	5.17968	6.05263	-0.477182	9.85617e-10	DNAJC11
ENSG00000185015	0.166502	0.0968604	0.232058	0.194075	0.108068	0.602066	0.580875	0.584729	0.526647	0.376939	1.75178	9.92127e-10	CA13
ENSG00000145284	14.6439	13.2239	13.8574	14.984	12.5039	18.5554	18.813	18.5326	17.6065	18.3344	0.409242	1.00396e-09	SCD5
ENSG00000199927	2.12078	5.4833	1.61226	3.84534	2.52359	15.3374	17.8804	12.8512	14.2911	7.34301	2.11938	1.01152e-09	ACEA_U3
ENSG00000157110	2.97399	2.62463	3.15348	3.04987	2.89303	4.11922	4.26208	4.77603	4.23062	3.78791	0.526959	1.0199e-09	RBPMS
ENSG00000112183	0.954476	1.14012	0.812683	0.899925	0.722758	1.91551	2.0784	1.71148	2.31546	1.58375	1.08885	1.02136e-09	RBM24
ENSG00000111371	18.9717	17.5303	19.0854	17.1101	13.4513	29.0309	28.9232	27.7252	29.0126	21.6138	0.662225	1.02447e-09	SLC38A1
ENSG00000198791	11.1625	10.3506	10.6947	12.2168	10.0626	8.19545	8.04291	7.70543	7.61858	8.49689	-0.443005	1.03195e-09	CNOT7
ENSG00000175352	1.81782	1.90472	1.37183	1.56126	0.845222	4.97313	4.39709	4.85765	5.20374	1.91751	1.5124	1.05915e-09	NRIP3
ENSG00000235770	22.4521	24.102	25.7981	23.1824	16.2053	14.214	13.4556	14.1896	13.5732	15.169	-0.661875	1.07251e-09	LINC00607
ENSG00000204138	8.65274	8.5691	8.17886	7.54496	7.7333	6.105	5.87278	6.43088	5.90935	6.15853	-0.415611	1.07362e-09	PHACTR4
ENSG00000134508	39.9367	35.6748	41.1693	36.5821	23.2009	20.8737	18.7703	20.3456	19.1085	23.0444	-0.789296	1.10869e-09	CABLES1
ENSG00000115902	8.96298	7.6993	9.24355	7.33545	6.33505	4.84779	4.72399	4.87749	4.85226	5.6967	-0.661626	1.13611e-09	SLC1A4
ENSG00000184787	13.6597	13.4481	13.8593	13.3921	14.4	11.0933	10.9564	11.2811	10.2883	11.1074	-0.329666	1.14181e-09	UBE2G2
ENSG00000164117	3.34571	3.15465	3.65215	3.81797	3.13583	1.60743	1.80933	1.62397	2.18472	2.18099	-0.862112	1.15807e-09	FBXO8
ENSG00000169220	0.640648	0.7991	0.598917	0.800563	0.904679	1.64351	1.49757	1.36875	1.71683	1.5495	1.04822	1.1593e-09	RGS14
ENSG00000235750	8.4122	9.06773	7.89982	7.81327	6.60936	11.6678	11.5249	11.926	12.2265	10.5838	0.542939	1.18249e-09	KIAA0040
ENSG00000186994	17.9452	21.3045	19.242	20.8958	24.4208	28.906	28.4603	31.1257	29.7251	34.9572	0.560406	1.22066e-09	KANK3
ENSG00000161642	4.48774	3.74292	4.16369	3.67478	3.22599	7.79597	7.26002	9.09131	7.10734	4.95454	0.91007	1.22486e-09	ZNF385A
ENSG00000183495	6.77302	7.86253	7.49098	6.44939	5.88992	4.62624	4.2059	4.87591	4.35124	5.23904	-0.5645	1.24532e-09	EP400
ENSG00000035862	139.682	133.13	133.648	135.437	87.3709	80.0488	79.7354	79.9986	75.2774	81.5659	-0.665789	1.28187e-09	TIMP2
ENSG00000136231	6.34965	6.27023	6.3647	6.20467	5.48081	4.64371	4.53529	4.47555	4.5435	3.83802	-0.476166	1.29607e-09	IGF2BP3
ENSG00000129245	11.7037	9.87671	11.5381	11.2985	10.4142	14.4362	14.365	14.5462	15.1976	14.4052	0.412815	1.31448e-09	FXR2
ENSG00000160803	21.2593	20.4961	23.1405	20.8871	19.0507	14.2221	11.9891	14.2515	12.0279	16.7517	-0.597657	1.31646e-09	UBQLN4
ENSG00000173950	18.7303	19.8093	18.9192	19.1623	13.9254	11.4932	11.7989	13.065	10.1679	12.1688	-0.624895	1.33927e-09	XXYLT1
ENSG00000111859	10.1609	10.2918	10.6218	9.82158	10.2268	12.2606	12.7996	12.9893	12.268	12.6193	0.29973	1.35492e-09	NEDD9
ENSG00000168386	9.15498	7.95199	11.4881	10.8846	8.14686	15.4446	16.3305	15.2249	14.86	23.038	0.834243	1.38969e-09	FILIP1L
ENSG00000130939	9.21198	9.45722	10.24	9.50065	7.07921	6.28313	5.81908	5.57561	5.49828	6.60663	-0.610211	1.41613e-09	UBE4B
ENSG00000121067	9.95439	10.4161	9.93463	9.79988	11.5954	6.69781	6.37518	5.79162	5.93212	8.47244	-0.636084	1.42561e-09	SPOP
novel.177	2.05024	2.19784	2.0049	1.67761	1.29773	0.655821	0.588415	0.861555	0.627528	1.18593	-1.23219	1.43195e-09	-
ENSG00000116198	4.97507	5.09882	4.90112	4.51788	4.74701	3.35044	3.23615	3.39593	2.8366	3.86733	-0.53793	1.46181e-09	CEP104
ENSG00000186185	1.59594	1.53367	1.41547	1.13956	1.401	0.485164	0.574844	0.476541	0.543838	0.947924	-1.22449	1.49454e-09	KIF18B
novel.15	1.85391	1.51787	1.36463	1.54352	1.47068	2.98702	2.70772	2.71125	2.56168	2.16317	0.763849	1.51437e-09	-
ENSG00000168264	35.4886	37.4796	33.3888	38.2421	32.5848	26.3949	26.5097	23.0095	24.0483	28.5024	-0.463586	1.52483e-09	IRF2BP2
ENSG00000131015	3.21655	4.89534	3.45797	3.18117	3.39517	6.16794	6.64511	8.31598	7.41267	6.45115	0.94692	1.55722e-09	ULBP2
ENSG00000166135	3.96822	4.05581	4.06707	3.9137	3.77213	5.23177	4.68522	5.16127	5.26729	5.15768	0.36776	1.56492e-09	HIF1AN
ENSG00000143401	11.8723	10.3145	10.368	11.904	10.7853	8.11118	8.36914	8.08732	7.86507	7.83712	-0.455487	1.5891e-09	ANP32E
ENSG00000123505	8.02004	6.92804	8.23542	7.97233	5.85932	4.74835	4.12204	5.12516	5.03019	4.77762	-0.635647	1.59772e-09	AMD1
ENSG00000206532	0.09647	0.0436491	0.0855612	0.174916	0.07305	1.0029	1.37427	1.06951	0.650072	0.719424	3.35445	1.68524e-09	RP11-553A10.1
ENSG00000112763	6.78797	6.69246	6.71327	6.38994	5.1269	9.55755	9.18581	11.6484	10.5287	8.72276	0.648463	1.6868e-09	BTN2A1
ENSG00000148400	59.1566	66.8522	62.1225	59.4941	50.2068	44.5082	42.4203	43.3332	41.1892	45.6109	-0.456264	1.71422e-09	NOTCH1
ENSG00000197261	7.75962	9.10619	7.81433	8.10921	11.0404	13.5846	13.7208	14.4006	13.9279	12.4656	0.633028	1.72797e-09	C6orf141
ENSG00000166946	4.57464	5.03381	5.16149	4.62203	5.69361	6.71675	7.52018	7.98203	7.06701	6.75121	0.520441	1.72956e-09	CCNDBP1
ENSG00000080573	1.75318	1.61294	2.15099	2.19868	1.89546	1.06538	0.852323	1.20187	0.787599	1.21664	-0.906404	1.74426e-09	COL5A3
ENSG00000198890	9.52489	9.46079	9.40627	10.0705	8.90623	12.4727	14.4484	14.464	13.6691	12.0182	0.501886	1.77569e-09	PRMT6
ENSG00000062598	5.84903	5.852	6.1951	5.85367	4.93459	8.05285	8.12138	8.43402	7.69293	7.44014	0.471688	1.77937e-09	ELMO2
ENSG00000078237	10.2216	8.71841	9.06573	9.99622	6.94961	14.6665	15.3357	15.1164	15.66	11.8193	0.693344	1.78221e-09	C12orf5
ENSG00000105971	25.6295	22.7461	25.5938	26.6431	21.1541	33.5606	34.2504	32.2482	31.9553	32.2977	0.432728	1.82434e-09	CAV2
ENSG00000178999	2.52299	2.89372	3.27847	3.61712	2.77686	0.928219	1.43288	1.66864	1.04494	1.6682	-1.16423	1.8341e-09	AURKB
ENSG00000007516	0.0428093	0.164642	0.094921	0.0873228	0.129666	0.348294	0.402931	0.340475	0.453317	0.389085	1.87857	1.8505e-09	BAIAP3
ENSG00000099219	16.6375	15.6663	17.9807	15.7863	12.6289	10.9524	11.4775	10.6119	10.6064	10.5147	-0.538522	1.90593e-09	ERMP1
ENSG00000188766	1.12272	1.74843	1.80627	1.39657	1.12695	3.13921	2.7099	3.4484	3.06643	2.55561	1.05242	2.03055e-09	SPRED3
ENSG00000204120	7.67055	7.14361	7.52009	7.31781	7.18884	5.78364	5.75756	6.04067	5.77815	6.04415	-0.324745	2.04207e-09	GIGYF2
ENSG00000177889	10.8648	10.3348	10.9197	11.0002	10.5857	13.5664	13.595	13.8104	13.2353	12.8946	0.321444	2.04389e-09	UBE2N
ENSG00000152409	4.29716	4.29655	4.43677	4.43625	4.61387	3.32591	3.37373	3.08419	3.40874	3.42963	-0.410476	2.07174e-09	JMY
ENSG00000145911	19.6692	19.5703	20.0153	18.1749	28.3717	33.4699	31.2481	36.9543	32.2692	34.0399	0.666409	2.08292e-09	N4BP3
ENSG00000106330	11.8462	11.6506	12.7025	13.5366	12.6045	15.9428	18.1003	17.0751	19.5808	18.8545	0.521602	2.08671e-09	MOSPD3
ENSG00000142945	1.91138	2.02338	2.59084	2.05977	1.31081	1.07585	0.60549	0.695337	0.798492	0.924499	-1.26513	2.08885e-09	KIF2C
ENSG00000160007	13.2541	13.4648	14.1043	13.2668	11.2539	10.3009	9.58992	9.47459	9.97318	9.42315	-0.421756	2.11214e-09	ARHGAP35
ENSG00000118200	13.1624	14.7185	14.2982	13.9331	11.5033	10.2175	10.2363	9.75516	9.55401	9.54317	-0.45512	2.13938e-09	CAMSAP2
ENSG00000187239	10.7183	10.9523	11.4853	10.2047	11.8877	6.29445	6.2843	6.77974	6.03165	9.25789	-0.67315	2.19089e-09	FNBP1
ENSG00000136720	14.8111	14.7877	15.9876	13.8347	15.9992	9.54373	8.92823	10.543	10.3252	12.354	-0.544943	2.25333e-09	HS6ST1
ENSG00000135476	0.998367	0.923526	0.76085	0.804536	0.531995	0.307525	0.436451	0.292304	0.370196	0.358478	-1.18472	2.26122e-09	ESPL1
ENSG00000151474	7.27979	6.45916	6.61988	6.4996	4.8752	10.6512	9.77851	10.5321	10.3195	8.20316	0.641774	2.35965e-09	FRMD4A
ENSG00000175264	24.6494	24.7691	25.1816	24.7288	27.1104	32.5016	30.5828	35.8995	35.1202	39.5416	0.457461	2.36129e-09	CHST1
ENSG00000171862	10.4181	9.19292	10.05	10.6868	8.91767	7.7616	7.57199	7.35321	7.30469	7.13653	-0.407468	2.36598e-09	PTEN
ENSG00000129038	0.506143	0.703391	0.641297	0.803006	0.684404	1.37265	1.80257	1.70779	1.54873	1.11214	1.17051	2.47971e-09	LOXL1
ENSG00000186063	10.5328	10.4452	10.8298	11.7318	8.77565	15.7148	15.8549	15.7851	14.267	13.5692	0.524331	2.51133e-09	AIDA
ENSG00000129351	35.3356	35.5333	36.9476	35.1441	32.769	28.6864	28.0651	27.8488	28.808	29.8311	-0.294716	2.54297e-09	ILF3
ENSG00000198355	120.963	125.394	124.534	134.584	135.211	161.586	176.01	180.663	173.923	224.923	0.517394	2.63066e-09	PIM3
ENSG00000129675	4.588	4.25352	4.70359	4.33542	4.00806	2.93745	2.63056	2.76807	2.30178	3.41959	-0.637101	2.68264e-09	ARHGEF6
ENSG00000168256	17.5877	16.6424	17.2122	14.2528	13.309	22.4767	23.7735	26.1218	23.4577	20.6562	0.560708	2.70165e-09	NKIRAS2
ENSG00000125970	21.0368	20.6047	21.2502	21.0152	21.7078	24.8394	26.3031	27.9064	26.0806	25.2061	0.303106	2.70393e-09	RALY
ENSG00000109220	19.0549	17.7398	20.7491	22.2493	20.9635	26.5147	28.4238	28.2758	29.1476	28.318	0.480273	2.8155e-09	CHIC2
ENSG00000136100	5.8671	6.13589	5.4737	6.94338	7.3691	9.4008	10.1645	8.61399	9.65008	8.96255	0.556119	2.8167e-09	VPS36
ENSG00000266176	9.21056	13.9394	9.43664	14.9727	11.063	2.72758	5.97875	3.52111	4.4333	5.18118	-1.42954	2.8343e-09	RP11-855A2.5
ENSG00000119906	5.42169	5.14731	5.16622	5.01313	4.60161	3.91834	3.95626	3.7066	3.528	3.60426	-0.436695	2.88518e-09	FAM178A
ENSG00000082213	7.438	7.37255	6.75065	7.78607	6.70622	10.2141	10.3906	9.19101	9.86049	9.54838	0.449865	2.9673e-09	C5orf22
ENSG00000092853	0.814058	0.989547	1.01296	0.793087	0.864841	0.307542	0.34617	0.281116	0.467856	0.509678	-1.22631	2.99726e-09	CLSPN
ENSG00000100300	105.507	105.249	106.16	116.461	97.9932	135.122	156.37	154.159	158.897	128.3	0.463835	3.0084e-09	TSPO
ENSG00000178567	7.74848	7.47178	6.52042	7.36183	6.97514	5.06572	5.18477	4.17115	4.85738	5.54728	-0.538338	3.04515e-09	EPM2AIP1
ENSG00000198792	32.9508	32.7963	34.7604	29.9202	22.8762	47.0458	42.5747	52.7872	48.7859	45.7261	0.628412	3.05978e-09	TMEM184B
ENSG00000140859	7.18208	5.71934	7.05711	6.53483	4.66721	10.1363	10.0984	11.3382	10.6013	8.51283	0.70299	3.06292e-09	KIFC3
ENSG00000203950	26.4017	26.9956	22.5404	26.1498	25.0295	31.1023	38.7635	37.8777	36.4226	35.8026	0.501504	3.07228e-09	FAM127B
ENSG00000101846	3.30688	3.01985	3.62146	2.9614	2.45062	2.00509	1.93891	1.71061	1.7761	1.99243	-0.702496	3.12032e-09	STS
ENSG00000115129	18.4835	20.5089	17.8814	19.1543	20.8436	28.9965	30.4105	32.2383	32.1647	22.6376	0.595518	3.14581e-09	TP53I3
ENSG00000146247	4.78745	4.5837	4.9677	5.10932	5.43216	4.05426	3.25098	3.3957	3.40039	3.7321	-0.480358	3.18409e-09	PHIP
ENSG00000165527	28.492	25.5061	29.4039	29.2385	24.6792	20.4054	19.2817	20.0061	20.6161	21.8504	-0.426005	3.24775e-09	ARF6
ENSG00000162434	66.3792	64.4571	67.6791	64.8581	43.4	108.375	108.379	104.747	107.272	79.0886	0.727382	3.28165e-09	JAK1
ENSG00000181350	2.09955	2.06095	2.30399	2.35507	3.94765	1.07767	1.26734	1.1664	0.993443	1.21079	-1.16472	3.28797e-09	LRRC75A
ENSG00000129691	12.0476	12.1605	12.402	12.4853	12.1974	9.71436	9.67805	8.92253	9.38094	10.2973	-0.352755	3.29048e-09	ASH2L
ENSG00000144824	9.01277	8.43594	9.12041	9.35214	10.0809	6.17934	5.93342	5.87269	6.13606	7.80435	-0.527041	3.3012e-09	PHLDB2
ENSG00000187735	14.5683	14.633	15.4307	16.6008	15.2378	10.9634	12.7518	10.2049	11.2857	10.9285	-0.446702	3.34143e-09	TCEA1
ENSG00000090863	37.1128	36.9609	38.3991	35.0439	33.3889	29.374	27.8938	29.1548	28.2117	29.9691	-0.322863	3.39648e-09	GLG1
ENSG00000256069	0.324698	0.49823	0.26294	0.127985	0.267251	0.025524	0.0143649	0.0136096	0.0135901	0.01316	-4.19537	3.45622e-09	A2MP1
ENSG00000162458	107.204	103.483	109.77	97.897	83.3526	138.966	134.447	153.813	143.823	130.239	0.48331	3.51614e-09	FBLIM1
ENSG00000167536	1.47389	1.69751	1.62412	1.51841	2.40124	0.52488	0.545359	0.861141	0.730921	0.874323	-1.30592	3.68173e-09	DHRS13
ENSG00000196843	6.03041	6.65863	6.72241	5.70113	5.61374	8.83569	7.93762	8.87142	8.85871	9.04247	0.504481	3.7275e-09	ARID5A
ENSG00000130479	22.567	22.5817	21.2184	20.6126	14.4807	32.8412	30.7941	33.7146	34.0807	28.6366	0.658409	3.74772e-09	MAP1S
ENSG00000143751	7.19466	6.48071	7.71599	6.59753	7.37673	9.86805	9.30674	10.8743	10.5084	9.23529	0.493103	3.81983e-09	SDE2
ENSG00000145819	2.29541	2.63882	2.37661	2.14797	2.40581	1.74998	1.42346	1.54805	1.3941	1.80455	-0.582189	3.94953e-09	ARHGAP26
ENSG00000088247	56.0765	54.7739	57.1599	56.0237	49.4672	41.1977	39.4816	43.4201	42.6366	45.491	-0.365587	3.97249e-09	KHSRP
ENSG00000064651	3.4956	3.28599	3.79474	3.26965	2.71233	5.51746	5.12521	5.08752	5.47193	4.17232	0.616985	4.04049e-09	SLC12A2
ENSG00000185920	1.16898	1.28017	1.56749	1.11726	1.27827	0.680621	0.770141	0.637964	0.80871	0.919787	-0.7489	4.06232e-09	PTCH1
ENSG00000119686	1.29803	1.74376	1.70906	1.4558	1.0133	0.641141	0.735286	0.528919	0.798683	0.511444	-1.16642	4.06949e-09	FLVCR2
ENSG00000141522	74.1917	73.819	73.1737	77.8346	60.2444	91.7386	96.6475	101.98	103.84	94.895	0.445404	4.11887e-09	ARHGDIA
ENSG00000139734	1.56685	1.29495	1.28525	1.25626	1.11103	0.794181	0.81099	0.689767	0.714935	0.58255	-0.855778	4.13429e-09	DIAPH3
ENSG00000112297	5.4096	5.86098	5.28568	4.60658	6.53296	3.16123	3.01535	2.66688	2.4497	4.27754	-0.830912	4.13751e-09	AIM1
ENSG00000119801	28.135	24.2427	28.8908	29.026	24.0405	34.8847	37.3695	38.4986	37.4999	34.5931	0.445229	4.1706e-09	YPEL5
ENSG00000066583	6.94721	6.07205	5.89111	6.75907	5.77387	9.43568	9.93116	11.6959	11.777	8.33994	0.704318	4.22358e-09	ISOC1
ENSG00000154639	3.92577	3.10735	3.68255	3.67499	1.69869	7.41795	7.24839	7.19926	7.3689	4.88856	1.08644	4.32166e-09	CXADR
ENSG00000066629	6.32399	6.69882	6.55897	6.16187	5.2866	4.64828	4.47286	4.60803	3.98269	4.35248	-0.490877	4.33205e-09	EML1
ENSG00000172785	1.47542	1.29316	1.33738	1.35862	1.53531	1.00243	0.996144	0.930349	0.897751	0.947185	-0.553019	4.35433e-09	CBWD1
ENSG00000109458	3.87878	4.03916	4.39673	4.15846	3.64558	5.67954	5.54669	5.14231	5.16621	5.99595	0.453303	4.428e-09	GAB1
ENSG00000174938	1.23171	1.30278	1.26267	1.01513	1.32029	1.90878	2.27874	2.05098	2.21743	2.86299	0.882487	4.47253e-09	SEZ6L2
ENSG00000128791	37.1341	35.4682	39.1144	39.4439	31.3968	25.0729	26.578	24.1373	25.915	29.5029	-0.476185	4.60652e-09	TWSG1
ENSG00000178531	41.5417	45.8578	40.9634	53.2869	30.9096	70.8619	74.5638	80.8916	80.9744	57.3413	0.779131	4.69488e-09	CTXN1
ENSG00000178057	11.9118	13.1502	12.8407	12.6846	13.2333	16.5307	18.1948	16.6392	18.1235	16.1398	0.422401	4.7299e-09	NDUFAF3
ENSG00000170113	3.72551	3.50124	3.67286	3.29528	3.01562	5.42407	4.80585	5.58035	5.36867	4.26184	0.565312	4.83398e-09	NIPA1
ENSG00000155363	12.363	12.6866	12.3267	11.7026	11.2738	15.5133	14.7587	16.6118	15.4407	14.9613	0.357478	4.87199e-09	MOV10
ENSG00000079313	9.48418	11.2144	9.35382	10.2261	9.80542	13.9579	12.6615	15.08	13.622	12.9786	0.447647	5.11033e-09	REXO1
ENSG00000184194	4.72252	4.97073	4.77059	4.28136	4.45113	3.58556	3.01968	2.90217	2.63705	3.19197	-0.595153	5.13797e-09	GPR173
ENSG00000164902	8.58527	7.38335	9.46406	10.1845	8.12628	6.37121	5.94781	5.31224	5.53909	5.91716	-0.588032	5.29278e-09	PHAX
ENSG00000243364	11.2957	10.4102	9.69524	10.3349	9.65714	14.2582	17.4262	16.9114	16.0854	13.6353	0.6086	5.33605e-09	EFNA4
ENSG00000075391	7.41436	8.18752	7.67194	7.08222	6.83731	5.55227	5.24124	4.78284	5.2	6.06187	-0.470105	5.79766e-09	RASAL2
ENSG00000088836	2.91588	3.89239	3.84351	3.82649	2.52516	5.92724	5.98323	7.01979	6.51347	4.76051	0.829961	5.84163e-09	SLC4A11
ENSG00000182568	3.49584	3.34539	3.27447	3.28039	3.76467	2.47322	2.11034	2.17427	2.1334	2.81543	-0.551451	5.85141e-09	SATB1
ENSG00000162692	0.119555	0.137694	0.192792	0.246333	0.115221	0.569861	0.364955	0.953477	0.5336	0.476184	1.83961	5.87618e-09	VCAM1
ENSG00000115109	3.91732	4.25642	4.46702	4.26422	3.94256	2.74718	2.8832	2.56771	2.49584	3.43375	-0.561046	5.95195e-09	EPB41L5
ENSG00000064490	16.4426	14.2852	15.4686	15.5496	14.7183	8.09688	10.6106	8.7866	8.57173	12.2915	-0.660956	5.96709e-09	RFXANK
ENSG00000163625	7.70319	7.64144	8.25389	6.76789	6.17569	5.25712	4.70298	4.84299	4.86609	5.68647	-0.526626	6.10786e-09	WDFY3
ENSG00000164111	143.862	132.498	144.199	144.862	121.801	173.498	188.609	194.694	188.762	166.769	0.408898	6.12846e-09	ANXA5
ENSG00000164253	2.35516	2.49331	2.48402	3.03372	1.98997	4.29098	3.77512	4.35683	4.23679	3.33131	0.695726	6.25114e-09	WDR41
ENSG00000134245	0.434422	0.440484	0.394582	0.483996	0.661878	0.146677	0.271616	0.232106	0.161234	0.214679	-1.24276	6.2931e-09	WNT2B
ENSG00000166734	10.3707	9.84713	11.2038	12.0784	10.8051	8.38283	7.77967	7.00573	7.4056	8.53839	-0.473272	6.32188e-09	CASC4
ENSG00000159423	6.41582	4.59629	5.61129	4.71781	3.92708	8.3937	8.26924	8.77939	9.04131	7.27656	0.72767	6.3911e-09	ALDH4A1
ENSG00000117475	2.89137	3.58209	3.63292	4.13474	4.02699	2.27151	2.04895	1.85826	2.00471	2.53486	-0.770478	6.43494e-09	BLZF1
ENSG00000162591	34.7168	41.1106	37.5838	38.4763	39.4506	29.2308	25.7839	26.6252	26.2184	32.2667	-0.449385	6.52876e-09	MEGF6
ENSG00000122786	46.0003	43.5067	45.2712	48.3822	36.9672	32.4123	30.0267	27.6044	28.6772	35.2473	-0.515523	6.53957e-09	CALD1
ENSG00000090372	22.2848	21.8868	23.1073	22.9799	18.6143	28.4368	28.8042	32.5817	31.3009	27.4628	0.448975	6.55698e-09	STRN4
ENSG00000171345	5.93838	5.83222	5.26687	4.94988	5.00819	10.6348	12.4287	11.2326	16.906	6.42767	1.09442	6.56257e-09	KRT19
ENSG00000005436	3.6812	3.66869	3.78775	3.79538	3.52539	2.78403	2.71752	2.50505	2.48988	2.41107	-0.515398	6.70308e-09	GCFC2
ENSG00000198844	21.149	23.1839	21.2907	21.2561	20.3121	28.3017	26.1701	27.7991	26.3247	26.186	0.330838	6.83591e-09	ARHGEF15
ENSG00000148719	10.9167	10.6371	10.9622	10.0657	10.1171	7.38567	7.3541	8.23525	7.32716	8.76598	-0.431123	6.8768e-09	DNAJB12
ENSG00000142731	1.3495	1.11501	1.15787	1.14365	1.25514	0.689534	0.656735	0.593922	0.578951	0.519604	-0.986064	6.90589e-09	PLK4
ENSG00000100226	7.76115	7.75911	7.33338	7.27699	7.24257	5.67688	5.20204	5.29331	5.22372	6.34173	-0.429175	6.92944e-09	GTPBP1
ENSG00000141646	4.54394	4.04846	4.45223	4.69627	4.43852	3.07058	3.28293	3.15862	3.08657	3.71274	-0.443204	6.95311e-09	SMAD4
ENSG00000113621	8.17902	7.65001	7.32059	7.50552	8.85041	5.5651	5.29843	5.0078	5.5055	6.34394	-0.5113	7.02033e-09	TXNDC15
ENSG00000196549	1.49667	1.40386	1.41835	1.42501	1.45935	2.29822	2.29482	2.12804	2.19736	1.77742	0.570143	7.0698e-09	MME
ENSG00000135966	25.0277	25.0657	26.2371	23.8709	21.8202	18.2801	19.0053	18.5865	17.9908	20.0136	-0.377876	7.15457e-09	TGFBRAP1
ENSG00000170468	4.8047	4.95178	5.35041	4.88824	5.55846	7.23904	7.60507	7.0508	7.60601	8.75868	0.580091	7.21711e-09	C14orf169
ENSG00000125944	16.724	17.0472	17.044	17.7104	17.702	14.3444	14.6579	13.3978	13.9038	12.9198	-0.317253	7.22043e-09	HNRNPR
ENSG00000114698	41.201	39.7047	42.3634	43.0064	35.7683	27.544	27.5376	26.4946	24.9893	34.2024	-0.521036	7.2219e-09	PLSCR4
ENSG00000120008	10.2102	9.61277	9.89499	10.1584	9.39902	7.76566	7.63607	7.63812	7.69726	8.45459	-0.329653	7.40994e-09	WDR11
ENSG00000115310	60.1337	57.0671	59.6352	65.1557	37.54	93.6304	100.296	97.3404	97.7344	76.6996	0.73652	7.48078e-09	RTN4
ENSG00000147027	10.5411	8.83455	8.83136	10.615	9.51708	13.0476	13.1023	12.7573	13.0513	14.4825	0.459773	7.53261e-09	TMEM47
ENSG00000261594	0.0941559	0.191709	0.187895	0.12804	0.0356488	0.574536	0.742506	0.862313	0.838418	0.373026	2.42565	7.5523e-09	TPBGL
ENSG00000163029	7.60905	7.49728	6.6952	7.52314	7.86483	5.72305	5.57705	5.11608	5.30846	6.08867	-0.419073	7.70427e-09	SMC6
ENSG00000100906	13.4924	12.4854	14.3748	14.4423	19.5945	21.8896	23.3704	27.3498	24.4302	35.4079	0.831156	7.74949e-09	NFKBIA
ENSG00000135750	1.16009	1.03339	1.09321	0.96955	0.851001	1.91718	1.93665	1.79987	2.51272	1.68971	0.953269	7.82235e-09	KCNK1
ENSG00000118263	7.25445	6.49409	7.49178	6.57032	5.08478	9.64447	9.1946	10.8736	9.78516	9.59453	0.578686	7.87989e-09	KLF7
ENSG00000108984	1.23438	0.98104	0.79016	0.846602	0.877816	1.95036	1.8349	1.77981	1.70493	1.3708	0.873782	8.26628e-09	MAP2K6
ENSG00000168542	0.106179	0.148494	0.059928	0.148766	0.138876	0.383942	0.441989	0.455971	0.343812	0.296937	1.66852	8.28653e-09	COL3A1
ENSG00000197329	15.2846	13.4853	14.5174	15.3739	13.698	10.3305	10.8009	9.23427	9.94216	11.856	-0.471485	8.32311e-09	PELI1
ENSG00000165915	20.7244	23.0499	23.6725	22.6371	19.0924	28.4975	27.3194	32.2845	30.4987	29.7205	0.44243	8.44738e-09	SLC39A13
ENSG00000167578	1.35263	1.1938	1.48108	1.10516	1.47947	2.32477	2.51481	1.94792	2.53993	2.31943	0.813718	8.61262e-09	RAB4B
ENSG00000163946	6.27061	6.01963	6.16101	6.02458	5.51349	4.80954	4.40581	4.26447	4.05865	4.79732	-0.423789	8.75694e-09	FAM208A
ENSG00000112699	5.85039	5.63975	5.45979	6.13476	5.27447	3.61787	4.11892	4.12323	4.20556	3.95852	-0.501624	8.76552e-09	GMDS
ENSG00000124120	1.48401	2.02705	1.58109	1.64999	1.79515	2.63245	2.46924	2.74431	2.6056	2.52313	0.601966	8.97881e-09	TTPAL
ENSG00000100811	18.9561	19.3886	20.6864	20.165	15.4921	13.4738	12.4388	13.4707	12.9522	14.8115	-0.495317	8.98557e-09	YY1
ENSG00000112640	17.5569	16.4443	18.2109	15.7909	12.8139	23.6726	23.6785	27.9989	25.648	21.304	0.598627	9.08755e-09	PPP2R5D
ENSG00000116830	1.26568	1.47259	1.39174	1.37576	0.95841	0.805588	0.735931	0.734588	0.677588	0.788572	-0.785286	9.12106e-09	TTF2
ENSG00000116016	213.232	208.139	214.282	192.382	180.058	146.937	134.079	135.205	127.809	170.454	-0.496603	9.19659e-09	EPAS1
ENSG00000128284	3.35351	3.62951	3.90314	3.75736	4.6738	2.32654	2.51673	2.42737	2.48824	2.79375	-0.624736	9.21179e-09	APOL3
ENSG00000102898	27.3611	25.6304	26.5576	25.1724	22.9043	32.6231	34.3504	36.4984	34.7725	30.761	0.405682	9.31189e-09	NUTF2
ENSG00000172531	57.2322	48.8284	52.266	50.8305	47.9105	64.8475	68.2546	74.6018	72.067	62.8457	0.414799	9.34102e-09	PPP1CA
ENSG00000127952	3.79294	4.25375	3.5078	3.85008	4.4923	6.12495	6.06959	7.37558	5.86705	6.64837	0.68665	9.37101e-09	STYXL1
ENSG00000175879	6.05178	6.13268	7.4745	7.50418	6.79813	3.77529	4.30037	4.48409	4.21286	4.96535	-0.644867	9.37572e-09	HOXD8
ENSG00000169607	0.831409	0.649769	0.84912	0.936467	0.61049	0.261918	0.358905	0.291458	0.303167	0.387514	-1.27227	9.48017e-09	CKAP2L
ENSG00000175595	1.60864	1.99016	2.35721	1.56404	1.55941	0.934342	0.806565	1.14623	0.770542	1.13734	-0.919969	9.52308e-09	ERCC4
ENSG00000112742	1.13427	0.844528	0.9678	1.15847	0.902388	0.441299	0.409069	0.373719	0.539043	0.508597	-1.13603	9.62731e-09	TTK
ENSG00000083312	42.009	40.6626	42.7795	42.648	34.1922	32.3984	31.1391	28.888	29.7819	29.4533	-0.415413	9.81508e-09	TNPO1
ENSG00000099139	1.85254	1.79816	1.85417	1.87182	1.07757	3.25581	3.10134	3.43215	3.22299	2.32023	0.860738	9.86054e-09	PCSK5
ENSG00000184428	2.81718	3.10354	2.56198	3.14624	3.31581	1.60554	1.70333	1.95818	2.22067	1.93154	-0.667461	9.88757e-09	TOP1MT
ENSG00000179222	64.5094	61.976	63.9898	63.6746	44.4792	39.1409	38.019	40.0339	38.0619	44.7114	-0.578367	9.93188e-09	MAGED1
ENSG00000095713	0.906691	0.837233	1.11598	1.10717	1.26105	0.368003	0.320083	0.2319	0.623451	0.275985	-1.5261	1.00519e-08	CRTAC1
ENSG00000130201	3.69693	3.58687	2.97465	3.62799	2.3088	1.44705	1.62881	1.72688	1.0273	1.38559	-1.16273	1.0063e-08	EXOC3L2
ENSG00000172349	0.0380528	0.0836278	0.0578568	0.103494	0.115259	0.211311	0.243384	0.25679	0.21979	0.329385	1.64427	1.02843e-08	IL16
ENSG00000175505	1.26495	1.86765	1.50573	1.99179	2.26862	3.79165	4.47112	4.62112	2.81997	3.50648	1.1022	1.04076e-08	CLCF1
ENSG00000121039	2.39699	2.1691	2.35607	2.3747	1.39405	3.7641	4.01058	4.07366	3.9132	3.14434	0.826111	1.04426e-08	RDH10
ENSG00000131269	6.57443	5.38849	5.67393	6.3817	7.59325	3.72204	4.41478	3.84121	4.09142	3.92065	-0.663796	1.07319e-08	ABCB7
ENSG00000143476	1.00302	1.39174	1.39963	1.30942	1.58991	0.507764	0.57154	0.464133	0.579336	0.897597	-1.15063	1.0759e-08	DTL
ENSG00000047346	6.11171	5.42778	5.9247	5.6802	6.51156	8.19676	8.40981	7.47126	8.18151	7.34907	0.416751	1.07795e-08	FAM214A
ENSG00000141905	13.35	14.8432	13.1817	13.0084	11.1476	9.67758	9.31139	10.0152	9.39148	9.87446	-0.440439	1.08051e-08	NFIC
ENSG00000004961	8.86915	9.09605	9.03992	8.75534	7.84597	12.8537	15.3563	13.7075	13.0102	10.6561	0.58913	1.08817e-08	HCCS
ENSG00000142208	11.2912	12.4243	11.639	11.0534	10.2136	15.2814	14.5518	16.1658	16.1597	13.6057	0.420479	1.08881e-08	AKT1
ENSG00000172432	9.88155	11.4124	11.3745	11.0208	10.6479	12.8145	14.4674	15.5435	15.8086	15.5998	0.44963	1.10898e-08	GTPBP2
ENSG00000186350	9.94616	9.94681	10.6116	9.13276	10.9842	7.31503	6.76769	7.52542	6.94695	8.45557	-0.451914	1.14777e-08	RXRA
ENSG00000110906	14.0019	12.6164	13.3584	12.3918	9.99708	17.3689	17.5839	17.9507	17.7325	16.6556	0.485766	1.15722e-08	KCTD10
ENSG00000172354	86.4088	84.6074	87.5364	84.8666	71.4778	105.635	108.881	121.258	116.145	103.287	0.42052	1.16042e-08	GNB2
ENSG00000152689	2.41264	2.18861	2.28142	2.49819	1.80005	4.36737	4.35633	4.21279	4.48	2.53015	0.835987	1.16406e-08	RASGRP3
ENSG00000125657	0.829208	0.71464	0.945567	0.429569	0.3289	2.14171	1.64732	2.09363	2.92689	1.61957	1.69676	1.16659e-08	TNFSF9
ENSG00000106012	3.29649	3.40278	3.3857	3.24082	2.64749	2.36724	2.21443	2.23557	2.08812	2.10184	-0.535187	1.16975e-08	IQCE
ENSG00000114450	9.75604	9.05604	10.6005	9.71089	8.89808	14.1232	13.2703	13.0735	14.5394	11.6571	0.473855	1.19427e-08	GNB4
ENSG00000141452	5.87231	6.46923	6.09518	5.70951	5.28447	7.96281	8.57326	7.85584	8.35663	8.50863	0.488738	1.20251e-08	C18orf8
ENSG00000072786	9.12734	8.60017	9.17373	7.77598	8.39683	6.58908	6.14988	5.8335	5.49068	7.00372	-0.470875	1.2091e-08	STK10
ENSG00000168944	3.48422	2.87794	3.24426	3.49331	2.99178	5.27897	5.03636	4.5832	4.94235	4.02704	0.570128	1.21623e-08	CEP120
ENSG00000065833	5.94839	5.77113	5.98495	7.2669	4.51906	3.45559	3.19504	3.91072	3.51085	3.72697	-0.726164	1.21943e-08	ME1
ENSG00000185432	2.4636	1.74853	2.04221	2.51082	3.53594	1.10626	0.819219	1.33497	1.14705	1.23082	-1.12688	1.22145e-08	METTL7A
ENSG00000124019	34.5153	33.6364	35.7665	32.8396	36.4836	44.1254	48.1185	42.7426	40.9655	45.588	0.354384	1.22575e-08	FAM124B
ENSG00000186187	4.93231	4.99602	4.84375	4.82279	4.1806	6.10221	6.20909	6.37822	6.63446	6.11887	0.404719	1.23865e-08	ZNRF1
ENSG00000175104	3.59023	3.73745	3.62717	3.67087	3.54648	6.19826	5.01284	5.1136	5.15824	4.74334	0.530307	1.26261e-08	TRAF6
ENSG00000186951	2.72609	2.62575	2.93836	2.17804	2.52116	1.73052	1.43439	1.53876	1.34119	2.00946	-0.688305	1.27555e-08	PPARA
ENSG00000137547	35.8806	35.4665	32.2639	39.7351	32.6874	48.8036	58.1912	54.1205	59.7288	42.6583	0.582082	1.29584e-08	MRPL15
ENSG00000176871	13.203	13.1077	14.3375	13.829	8.44465	21.5919	22.3185	21.859	22.047	17.1006	0.738362	1.3011e-08	WSB2
ENSG00000115255	0.375835	0.340103	0.404765	0.486751	0.365906	1.33474	1.61166	1.73396	1.96406	0.525522	1.86069	1.30211e-08	REEP6
ENSG00000197063	15.6678	14.7367	15.203	14.3983	13.6666	17.807	18.7877	19.0261	18.2108	19.5246	0.342451	1.30388e-08	MAFG
ENSG00000185262	28.866	28.8695	30.0149	29.5194	29.9754	34.0654	37.8974	39.7492	41.6645	41.3688	0.402896	1.3323e-08	UBALD2
ENSG00000100154	8.75031	9.03346	9.13039	7.07973	9.3386	6.10541	6.04166	5.91446	5.79087	6.90648	-0.494561	1.34939e-08	TTC28
ENSG00000166848	14.2423	12.3248	14.1159	15.7341	12.7	19.4708	18.7883	20.5765	19.9476	17.3393	0.476493	1.39419e-08	TERF2IP
ENSG00000137575	67.7257	60.4526	69.5619	71.1914	58.6504	84.5216	91.8334	88.862	89.5957	79.8974	0.408317	1.41567e-08	SDCBP
ENSG00000099804	37.945	35.837	36.5337	37.497	35.3146	43.8101	47.6954	51.1213	52.6759	44.9556	0.391898	1.42064e-08	CDC34
ENSG00000161940	39.0286	38.556	37.5888	36.1596	44.6265	52.3517	48.8766	55.6405	54.2727	65.6445	0.498048	1.42454e-08	BCL6B
ENSG00000119396	30.0463	29.2631	28.7756	28.9843	26.3376	20.3402	23.2991	21.0432	20.5278	23.9362	-0.39356	1.42775e-08	RAB14
ENSG00000102271	7.62761	7.64891	6.80517	7.83707	6.59731	5.27109	5.41572	4.56449	5.66753	4.49795	-0.522125	1.44973e-08	KLHL4
ENSG00000087274	25.759	25.5706	25.6268	25.1945	20.5842	18.2479	17.3037	18.6378	17.1479	19.7054	-0.430636	1.46291e-08	ADD1
ENSG00000180198	9.18189	9.77791	10.0333	8.968	9.34722	6.37432	6.50392	7.54757	6.96702	7.34548	-0.445701	1.46475e-08	RCC1
ENSG00000132912	10.6859	9.92954	9.91369	10.2357	8.19253	6.35355	7.34965	7.02247	6.96309	7.37303	-0.480757	1.47306e-08	DCTN4
ENSG00000005108	8.56018	8.54655	9.03807	8.0441	9.0557	5.65558	4.68876	4.20446	4.33742	7.17778	-0.730185	1.47917e-08	THSD7A
ENSG00000196511	0.459696	0.415991	0.566653	0.445007	0.253697	0.943821	1.25264	1.03655	0.885059	0.711782	1.17838	1.48105e-08	TPK1
ENSG00000135686	5.41347	5.60712	5.69973	5.34904	5.59349	6.89762	7.0679	7.48258	6.65502	6.86132	0.33747	1.49017e-08	KLHL36
ENSG00000198774	1.99015	2.136	2.21664	1.76228	2.54087	1.1715	1.23622	1.19353	0.946776	1.48846	-0.820572	1.52711e-08	RASSF9
ENSG00000087301	2.99658	2.1593	2.52238	2.43995	2.37415	1.65543	1.52457	1.41766	1.08175	1.51307	-0.793764	1.52933e-08	TXNDC16
ENSG00000125971	25.1753	22.4916	24.5803	24.9071	22.4633	29.5472	31.4907	32.7206	36.4813	30.643	0.42803	1.53021e-08	DYNLRB1
ENSG00000089693	32.6548	30.1953	33.049	30.9442	27.1894	37.4578	41.331	42.326	41.3112	39.3877	0.390265	1.60182e-08	MLF2
ENSG00000105429	39.5842	43.1398	44.1683	38.5856	33.297	30.0298	26.1248	30.0124	26.4243	29.9424	-0.479665	1.63819e-08	MEGF8
ENSG00000147274	26.2888	25.3471	23.5738	25.9508	26.813	20.9156	20.6766	19.5571	20.3145	21.2969	-0.316587	1.64125e-08	RBMX
ENSG00000071051	17.6344	17.7884	17.376	17.223	13.6697	24.1904	26.2891	26.4755	25.8025	20.251	0.556397	1.64639e-08	NCK2
ENSG00000135046	58.0326	54.3284	57.3	62.5822	44.0313	74.8738	83.9555	73.1767	78.8444	80.8098	0.50374	1.6511e-08	ANXA1
ENSG00000173153	11.6951	12.1147	13.2785	12.2943	14.36	17.9671	16.5588	17.6334	19.5925	16.4238	0.466609	1.67733e-08	ESRRA
ENSG00000206560	9.16888	8.43958	9.08331	9.59646	8.31124	7.02399	6.97503	6.29361	6.12186	7.22129	-0.406525	1.69486e-08	ANKRD28
ENSG00000156697	6.43448	6.62336	7.36187	6.31465	6.85788	4.40618	4.71408	4.2336	4.6921	5.41331	-0.518519	1.69559e-08	UTP14A
ENSG00000080839	1.38026	1.10914	1.01851	1.48156	1.3629	0.578953	0.730321	0.510957	0.605893	0.802872	-0.976819	1.69635e-08	RBL1
ENSG00000182022	30.7106	32.8638	31.0949	27.33	29.5204	19.6214	19.9322	20.4671	20.4501	26.2005	-0.506172	1.69637e-08	CHST15
ENSG00000136560	9.5806	9.05363	9.14523	10.2774	6.69254	14.8821	13.5498	13.8938	14.0101	11.9298	0.6105	1.72559e-08	TANK
ENSG00000127564	0.783603	0.898198	0.938242	1.13664	0.781268	0.236125	0.252493	0.276989	0.201158	0.596545	-1.53422	1.73521e-08	PKMYT1
ENSG00000174151	3.11968	3.25177	3.16657	3.34152	2.88727	4.39738	4.32658	4.22162	4.56038	4.20062	0.462767	1.73858e-08	CYB561D1
ENSG00000065609	0.691942	0.608266	0.534793	0.636264	0.770968	0.277012	0.372155	0.181059	0.180799	0.313294	-1.29522	1.75931e-08	SNAP91
ENSG00000143390	10.0351	10.2875	10.9856	9.08467	10.2802	5.62445	5.70364	6.34353	6.47245	8.51267	-0.633646	1.77884e-08	RFX5
ENSG00000167635	17.0307	17.7649	18.3537	20.9026	17.2189	12.8154	13.7635	13.9571	13.9218	11.4412	-0.470158	1.81822e-08	ZNF146
ENSG00000159202	26.7526	24.116	25.5721	22.5854	19.055	14.37	14.8609	16.4592	15.1045	18.4508	-0.574885	1.82842e-08	UBE2Z
ENSG00000096063	9.74572	8.9703	10.125	9.75268	7.58061	6.71414	6.8177	6.72442	6.37432	6.25497	-0.488683	1.83964e-08	SRPK1
ENSG00000101004	8.2837	9.62516	8.56015	8.45231	12.0067	6.22222	5.97935	5.52782	6.015	6.80388	-0.620365	1.86021e-08	NINL
ENSG00000166123	3.21789	3.54865	3.90936	3.42382	3.69028	2.33839	2.22149	2.62338	2.70926	2.36309	-0.538838	1.86678e-08	GPT2
ENSG00000053747	0.923375	1.0115	1.0431	0.942857	0.736008	0.549162	0.618138	0.604378	0.519301	0.511924	-0.731124	1.89684e-08	LAMA3
ENSG00000187608	39.8535	40.7503	39.7754	49.3755	33.6792	68.3767	68.9674	73.9879	82.5163	48.9598	0.753405	1.90238e-08	ISG15
ENSG00000135823	11.6628	10.6459	11.0192	10.3709	9.83834	13.4703	13.7575	14.7955	15.5365	13.2753	0.404678	1.95909e-08	STX6
ENSG00000150995	1.74367	1.63787	1.55101	1.17865	1.57516	1.05084	0.814494	0.820819	0.834367	1.07886	-0.739	1.97204e-08	ITPR1
ENSG00000179562	6.67067	6.08418	6.73482	5.79653	5.22093	3.98044	3.58163	3.7873	3.70572	4.8665	-0.612733	1.97745e-08	GCC1
ENSG00000172493	17.5126	19.3675	19.0038	17.737	16.1461	14.3805	12.8958	12.454	11.9585	14.5663	-0.437824	1.98121e-08	AFF1
ENSG00000088832	323.951	306.034	313.905	325.444	264.952	418.288	444.295	455.367	454.813	355.729	0.472318	1.98145e-08	FKBP1A
ENSG00000161179	8.88336	9.73473	11.1035	12.0633	8.20265	14.5024	16.095	16.5496	17.2476	14.116	0.651912	2.03861e-08	YDJC
ENSG00000105204	15.777	14.4075	16.2946	14.2098	11.8064	19.6991	19.8471	23.4101	22.6231	19.9294	0.542557	2.04105e-08	DYRK1B
ENSG00000163347	0.0538447	0	0.0636746	0.0650862	0.0271818	0.438078	0.493101	0.380661	0.431949	0.133849	3.17677	2.05661e-08	CLDN1
ENSG00000126261	18.3784	16.767	17.8502	18.0851	17.0701	14.3058	14.4215	13.9397	13.9328	14.4973	-0.309627	2.06098e-08	UBA2
ENSG00000257150	2.20372	1.96651	1.30302	1.4429	1.50649	0.91307	0.467161	0.560624	0.500892	0.627696	-1.44595	2.06545e-08	PGAM1P5
ENSG00000197451	65.3488	61.9165	69.211	66.6359	76.1382	83.7446	89.9292	96.8151	96.5007	84.8814	0.413036	2.08238e-08	HNRNPAB
ENSG00000134698	5.00297	4.96123	4.70203	4.86368	5.04892	7.40965	6.22302	6.48016	6.54055	6.12269	0.415612	2.08484e-08	AGO4
ENSG00000178105	3.04595	2.76339	2.92894	3.16294	2.45358	1.95978	2.07943	1.84275	2.09443	1.8543	-0.544621	2.1805e-08	DDX10
ENSG00000197461	7.15886	6.54991	5.97006	7.10752	4.59338	10.9816	9.42785	11.2835	10.2458	8.66655	0.691685	2.20493e-08	PDGFA
ENSG00000080822	10.9511	10.0696	10.1375	11.5504	9.38034	13.0781	15.2978	13.8374	13.4173	14.8956	0.437886	2.24042e-08	CLDND1
ENSG00000109790	10.8253	10.5595	11.6756	12.1198	9.07795	17.1342	15.3198	16.4118	16.4006	13.2723	0.534309	2.31142e-08	KLHL5
ENSG00000115252	0.218385	0.216444	0.11068	0.207412	0.204741	0.0282027	0.0105817	0.0200506	0.0400438	0.0193881	-3.00826	2.31899e-08	PDE1A
ENSG00000174130	0.315921	0.226737	0.212563	0.365418	0.173232	0.689359	0.665094	0.829664	0.797014	0.446824	1.41548	2.37086e-08	TLR6
ENSG00000119318	32.053	29.4182	30.5385	28.5809	29.1258	23.2708	24.9035	23.8413	21.9009	24.7268	-0.33537	2.37613e-08	RAD23B
ENSG00000130176	0	0	0	0	0.0689762	1.0499	1.39032	1.62457	1.20572	0.169826	6.16245	2.39127e-08	CNN1
ENSG00000180758	0.685347	0.930283	0.8575	0.76556	0.852585	1.33867	1.4819	1.75793	1.59048	1.24352	0.853301	2.41994e-08	GPR157
ENSG00000131069	8.49732	8.72796	8.30525	8.78822	8.06152	6.4675	6.22388	7.0383	5.59437	6.22533	-0.425153	2.42699e-08	ACSS2
ENSG00000059378	10.7429	11.8609	10.5951	11.0386	8.7448	8.46335	6.88666	7.31114	7.14961	7.11833	-0.519554	2.4296e-08	PARP12
ENSG00000197632	0.358866	0.281448	0.318286	0.43379	0.163047	1.03812	1.53367	1.29159	2.41826	0.490644	2.13071	2.45851e-08	SERPINB2
ENSG00000206538	1.15879	0.822447	0.967299	0.957845	0.391421	2.02833	1.97675	1.89472	2.18182	1.50382	1.16117	2.4594e-08	VGLL3
ENSG00000198856	80.0154	78.3684	85.8242	89.533	74.0134	60.6087	63.6291	59.0684	60.3537	67.2743	-0.390819	2.51525e-08	OSTC
ENSG00000113272	1.81716	1.73678	1.57546	2.40632	2.11812	0.793665	0.851799	0.944795	1.08103	1.12294	-1.01116	2.52249e-08	THG1L
ENSG00000263142	6.56925	6.15574	6.07922	5.06282	6.06351	4.12303	3.91575	4.28446	3.97896	4.62604	-0.515274	2.57851e-08	LRRC37A17P
ENSG00000139746	5.72226	6.24209	5.90473	6.11219	6.87094	4.83822	4.61977	3.94481	4.13925	4.81956	-0.464937	2.62155e-08	RBM26
ENSG00000106153	120.628	114.205	111.932	115.467	115.267	145.221	149.16	146.804	158.838	131.451	0.341029	2.64344e-08	CHCHD2
ENSG00000054277	4.39314	3.59521	4.48929	3.87885	3.51464	5.49086	6.02504	6.13177	6.30685	5.55526	0.572585	2.68492e-08	OPN3
ENSG00000135451	0.98101	1.24886	0.884825	1.1004	1.04503	0.345713	0.338378	0.464851	0.240096	0.650988	-1.36419	2.71891e-08	TROAP
ENSG00000179091	35.0525	32.2923	34.3365	32.5929	34.7855	44.7775	45.0499	48.8427	48.8048	38.7575	0.420071	2.72857e-08	CYC1
ENSG00000146425	13.3317	13.0325	13.7025	13.5819	12.6949	16.3848	20.507	16.8498	20.0877	17.4153	0.459539	2.75934e-08	DYNLT1
ENSG00000135341	5.98585	5.64726	5.83342	6.43284	5.80705	4.57237	4.4154	4.36741	4.27358	4.8676	-0.40034	2.81748e-08	MAP3K7
ENSG00000062650	8.97663	9.1202	9.51542	10.2258	8.41123	7.02904	7.25028	7.06931	7.07657	7.16405	-0.377532	2.82335e-08	WAPAL
ENSG00000100299	14.3956	15.6242	16.0492	15.6122	12.1912	20.6352	19.8502	21.0114	20.1826	19.7946	0.459239	2.8446e-08	ARSA
ENSG00000174996	6.45564	6.4391	6.80052	6.90778	6.69657	9.27447	7.96078	9.62441	8.53636	10.3579	0.458698	2.87693e-08	KLC2
ENSG00000074181	0.81883	0.88031	1.14212	0.93268	0.678337	1.49309	1.58805	1.59901	1.41481	1.3896	0.751375	2.87908e-08	NOTCH3
ENSG00000066654	9.30905	9.48723	9.95117	10.4176	10.7545	7.01472	6.7528	5.7505	6.42587	8.32872	-0.542728	2.91052e-08	THUMPD1
ENSG00000203706	6.22083	6.75527	4.58814	6.94573	10.165	13.0231	12.5266	13.5093	13.8051	13.6123	0.933446	2.91994e-08	SERTAD4-AS1
ENSG00000145375	1.45886	1.37066	1.44944	1.23585	1.41859	0.96568	0.827396	0.960652	0.82114	0.832305	-0.652678	2.92558e-08	SPATA5
ENSG00000187240	0.823875	0.799692	0.759287	0.876265	0.993301	0.545062	0.529222	0.563516	0.51397	0.377567	-0.752205	2.95524e-08	DYNC2H1
ENSG00000105821	3.53561	3.5892	3.44672	4.00439	3.3902	2.24547	2.62942	2.35599	2.33333	2.82901	-0.535548	2.96315e-08	DNAJC2
ENSG00000178980	13.2338	14.4296	12.0366	14.8525	10.4563	17.928	21.9473	19.6127	20.4388	17.1941	0.579608	2.97472e-08	SEPW1
ENSG00000085733	52.5936	52.6189	52.4026	50.4852	46.2087	65.5648	62.3631	66.6908	64.4003	59.231	0.323798	3.04077e-08	CTTN
ENSG00000185278	1.48958	1.54664	1.55182	1.42086	2.13314	1.12062	0.976103	0.944318	0.985236	1.11463	-0.66473	3.0657e-08	ZBTB37
ENSG00000136167	0.0259808	0	0	0	0.0098367	0.211378	0.185055	0.150279	0.387664	0.266408	5.11985	3.0679e-08	LCP1
ENSG00000150048	6.49352	6.15777	4.65523	5.88692	7.60342	8.96458	9.7528	9.68	9.36656	11.004	0.661684	3.07996e-08	CLEC1A
ENSG00000050130	6.36284	6.44174	6.60846	7.02901	5.92825	9.34526	9.27337	9.52886	9.5734	7.59382	0.485853	3.10056e-08	JKAMP
ENSG00000171469	4.58492	5.27137	4.36401	5.03217	4.09538	6.35038	6.32045	7.4092	6.49823	6.36835	0.497941	3.10144e-08	ZNF561
ENSG00000146731	57.8065	52.4631	55.8885	59.0985	58.6019	45.8275	47.9137	46.3855	46.4489	46.7539	-0.28296	3.11497e-08	CCT6A
ENSG00000122694	5.91807	5.25804	5.47789	5.57983	3.91098	7.85949	9.04374	8.50599	9.42605	7.06142	0.682907	3.11697e-08	GLIPR2
ENSG00000115756	11.4581	11.4466	11.0693	11.7447	8.54869	15.5133	15.8743	17.3769	16.388	13.678	0.539469	3.13551e-08	HPCAL1
ENSG00000137463	1.32569	1.11079	1.69835	1.24636	1.30129	0.177543	0.349725	0.142002	0.519926	0.411929	-2.06584	3.17648e-08	MGARP
ENSG00000124875	0.0903495	0.0545064	0.0267109	0.0546062	0.0912204	0.435603	0.643539	0.609702	0.753788	0.280742	3.09189	3.2307e-08	CXCL6
ENSG00000197622	21.5115	20.6465	22.0195	19.5019	21.4055	26.1225	25.0705	29.7662	26.9705	27.0543	0.36123	3.2542e-08	CDC42SE1
ENSG00000154473	8.9745	8.39364	8.68327	9.85958	9.48887	6.74524	7.32648	6.71217	6.90081	7.31739	-0.375755	3.25821e-08	BUB3
ENSG00000091436	1.96294	2.05225	2.31144	2.04305	2.15384	1.30072	1.21685	1.50653	1.44934	1.68771	-0.555405	3.26441e-08	ZAK
ENSG00000162772	1.00895	0.883571	1.15465	0.973707	0.628456	1.54466	1.8877	1.61588	1.97387	2.09343	0.977472	3.3171e-08	ATF3
ENSG00000127533	1.0033	0.959301	1.00737	0.720793	1.34744	2.03642	2.00326	1.95268	2.07745	1.7117	0.949559	3.31965e-08	F2RL3
ENSG00000086232	22.9927	20.3672	21.4539	21.1563	15.0876	13.7284	13.5362	13.738	12.7947	14.5319	-0.563872	3.37778e-08	EIF2AK1
ENSG00000141552	9.45269	8.95288	9.45528	9.6649	9.6427	11.7035	14.6021	13.2363	13.9874	11.4902	0.462157	3.39403e-08	ANAPC11
ENSG00000117593	5.70295	5.33815	5.65871	4.96016	4.79077	3.78603	3.42738	3.69387	3.07096	3.87086	-0.564886	3.39995e-08	DARS2
ENSG00000151835	6.76494	6.34989	6.76599	6.18918	4.25581	4.22517	3.97373	3.41421	3.68381	3.96014	-0.654441	3.40299e-08	SACS
ENSG00000186827	0.152805	0.241985	0.169407	0.173163	1.09923	1.58855	2.09905	2.35696	1.69163	2.74202	2.4757	3.53002e-08	TNFRSF4
ENSG00000197879	41.7354	42.0514	43.4392	32.3019	30.8827	54.8687	55.5482	61.9183	55.2461	53.0237	0.559588	3.57856e-08	MYO1C
ENSG00000198752	33.3018	33.9484	34.8409	32.5126	27.2877	25.1532	24.4708	24.8327	23.8348	25.1366	-0.391018	3.58428e-08	CDC42BPB
ENSG00000112679	5.98937	6.36163	6.87085	6.85546	6.3302	8.29923	8.34159	8.83931	8.4816	8.1269	0.376607	3.60748e-08	DUSP22
ENSG00000064999	9.28395	11.1052	10.0238	9.40169	11.7682	6.30545	6.1794	5.86384	6.22899	8.69958	-0.632606	3.62492e-08	ANKS1A
ENSG00000070214	11.9584	11.9164	12.0337	11.4877	11.7997	9.59944	9.34322	8.7374	8.84967	10.3822	-0.335328	3.66974e-08	SLC44A1
ENSG00000158669	9.44883	9.20246	9.03404	8.416	7.44966	11.2217	12.3026	12.6536	11.8224	10.9696	0.438104	3.68319e-08	AGPAT6
ENSG00000031081	18.5589	18.0561	18.7842	16.9776	14.934	13.0341	11.7341	13.8998	12.1061	13.5124	-0.441104	3.69858e-08	ARHGAP31
ENSG00000110917	19.3429	17.7428	19.454	15.4703	16.7574	24.0895	22.319	26.8302	24.4195	23.0905	0.444242	3.8132e-08	MLEC
ENSG00000156466	0.692794	1.3503	1.08711	1.20784	0.87434	0.305112	0.397661	0.359627	0.136805	0.513338	-1.6062	3.83935e-08	GDF6
ENSG00000147416	11.9443	11.6232	11.2576	11.0192	9.38856	15.4969	15.0725	16.6478	16.8264	13.1887	0.484316	3.84801e-08	ATP6V1B2
ENSG00000166831	4.72508	5.06872	4.13526	5.73048	3.88601	7.35481	8.53332	7.60198	7.22961	6.9716	0.680976	3.90862e-08	RBPMS2
ENSG00000067177	1.6462	1.76139	1.90081	1.4361	1.50527	1.00146	0.937617	0.928243	0.976747	1.14851	-0.722503	3.94555e-08	PHKA1
ENSG00000156802	1.87498	2.06448	2.03159	1.66633	1.24494	0.976905	1.16539	0.863706	0.657966	0.929879	-0.949871	3.96488e-08	ATAD2
ENSG00000153006	3.94274	3.11796	3.29575	3.36881	3.26298	2.51545	2.54737	2.14434	2.08249	2.35809	-0.54304	4.01076e-08	SREK1IP1
ENSG00000146373	2.99937	2.9144	3.33096	3.07365	2.60235	4.39966	4.04138	4.17111	4.00665	3.74075	0.449588	4.04072e-08	RNF217
ENSG00000196814	3.2105	3.52405	3.24684	2.82742	2.55106	2.02782	2.20616	2.09016	1.85436	2.05219	-0.5849	4.08797e-08	MVB12B
ENSG00000165194	0.478459	0.36589	0.555845	0.4582	0.454155	0.999071	0.863989	0.649652	0.830363	1.13702	0.955409	4.12902e-08	PCDH19
ENSG00000106366	832.233	800.145	878.196	811.344	341.556	1606.47	1603.55	1996.03	1760.15	1342.58	1.18144	4.1657e-08	SERPINE1
ENSG00000132109	7.6003	7.61792	7.04314	8.31162	9.3941	11.3689	10.5774	12.4197	12.1395	13.4391	0.582717	4.18396e-08	TRIM21
ENSG00000176340	66.0037	58.3203	60.9552	55.8408	58.8173	74.4372	95.7939	85.0067	94.1224	77.242	0.508188	4.20216e-08	COX8A
ENSG00000122034	13.1226	12.4895	12.7268	14.5382	14.2665	10.0804	10.0759	8.70129	8.20376	10.4764	-0.498463	4.20729e-08	GTF3A
ENSG00000165959	0.510847	0.405441	0.42337	0.493494	0.396341	0.238472	0.264164	0.213944	0.257978	0.265425	-0.843425	4.22265e-08	CLMN
ENSG00000156650	2.55127	2.34867	2.24972	2.20619	1.83902	1.57452	1.54263	1.47098	1.34135	1.64191	-0.561831	4.25105e-08	KAT6B
ENSG00000130766	7.69207	7.33981	7.97055	6.1277	5.01728	10.2066	11.8761	10.8845	11.6571	9.81497	0.674644	4.26012e-08	SESN2
ENSG00000164168	7.82737	7.04532	7.38774	7.60213	7.34286	4.60375	5.72149	5.2996	4.41896	5.91789	-0.519313	4.35782e-08	TMEM184C
ENSG00000196227	3.0754	2.7383	2.87004	2.60895	2.80576	1.96508	1.84744	1.72649	1.98559	2.01485	-0.561898	4.39407e-08	FAM217B
ENSG00000165156	4.56436	4.78351	5.02568	4.73037	4.73391	2.95355	3.27491	2.65141	3.01377	4.02754	-0.582325	4.46669e-08	ZHX1
ENSG00000139117	2.26004	2.29794	2.82654	2.93524	2.17286	4.52229	4.25053	4.24737	4.08239	3.14833	0.69743	4.47784e-08	CPNE8
ENSG00000143869	2.35365	2.33001	2.71796	2.0765	1.62676	0.74255	0.546495	0.868011	0.410574	1.48724	-1.45002	4.48949e-08	GDF7
ENSG00000184602	21.6567	22.5078	21.6022	20.5874	22.8626	29.3035	32.1762	31.8814	32.6001	24.5366	0.46207	4.50128e-08	SNN
ENSG00000115216	31.1511	29.2054	31.7318	30.053	24.6629	40.5176	41.7152	44.7073	43.42	34.7774	0.483	4.53284e-08	NRBP1
ENSG00000185088	12.1735	12.1569	11.7617	12.9693	12.2782	15.7128	19.3722	16.805	16.4759	14.4234	0.432352	4.57492e-08	RPS27L
ENSG00000177728	8.59117	10.1463	8.87097	8.53583	7.97864	6.62525	5.7876	6.3924	6.16165	7.13641	-0.45805	4.64286e-08	KIAA0195
ENSG00000080200	2.12563	2.09198	2.4338	2.65651	2.05063	1.58501	1.43583	1.36612	1.47977	1.7184	-0.581294	4.67201e-08	CRYBG3
ENSG00000028137	38.8426	42.5588	38.4604	38.7592	44.2976	23.5458	23.9808	21.3903	21.5109	35.5575	-0.687634	4.75833e-08	TNFRSF1B
ENSG00000150907	54.6908	56.8319	52.1789	53.9614	44.4548	37.4432	34.7323	31.0301	34.1224	43.8841	-0.532304	4.76703e-08	FOXO1
ENSG00000134690	2.36988	2.77108	2.64509	2.99341	2.21798	1.13136	1.21927	1.56589	0.999708	1.66308	-0.980512	4.78429e-08	CDCA8
ENSG00000145623	7.75296	7.32269	8.02229	6.3142	6.85617	9.46911	9.64203	10.0715	9.24548	10.2941	0.426507	4.80381e-08	OSMR
ENSG00000175198	2.47167	2.23668	2.67408	2.34702	3.1382	1.53132	1.59357	1.3968	1.41532	1.91674	-0.714226	4.97824e-08	PCCA
ENSG00000122299	12.3294	11.8466	12.3278	13.6962	11.6087	9.28109	9.31232	9.11827	8.57749	10.4539	-0.4026	4.99569e-08	ZC3H7A
ENSG00000151014	5.50037	4.91017	6.13095	4.64962	2.95493	8.73514	7.67675	9.9244	8.58644	10.1508	0.905173	5.08706e-08	CCRN4L
ENSG00000130589	4.00481	4.16151	4.68761	4.06539	3.87013	7.09782	5.16174	5.49966	6.64049	5.72936	0.535836	5.10423e-08	HELZ2
ENSG00000204160	6.7365	7.61731	6.55397	6.7212	5.68719	9.21664	8.52831	9.72386	9.34901	9.00799	0.461496	5.16677e-08	ZDHHC18
ENSG00000129566	5.40905	6.34957	6.26956	5.30363	6.82942	8.39967	7.67123	9.05828	7.90556	9.03491	0.479338	5.20415e-08	TEP1
ENSG00000090432	19.9822	19.4734	19.612	17.7488	17.3569	13.0908	13.9667	13.6743	13.7326	15.6357	-0.424934	5.21603e-08	MUL1
ENSG00000155876	54.3249	51.4065	49.9433	53.6012	43.9562	64.0331	72.4547	69.4827	64.6036	64.3714	0.40419	5.32975e-08	RRAGA
ENSG00000175073	2.65173	2.46544	2.69791	3.06347	2.709	1.88902	1.71584	1.65112	1.61056	2.21916	-0.579794	5.34623e-08	VCPIP1
ENSG00000143127	11.7445	12.2565	12.5293	12.0054	11.1383	14.5478	14.3004	14.9725	14.8209	15.7094	0.317844	5.3787e-08	ITGA10
ENSG00000173599	2.16301	2.11797	2.37096	2.17212	1.72189	1.32362	1.10612	1.41153	1.33476	1.37524	-0.683139	5.63235e-08	PC
ENSG00000123066	7.17902	7.22252	7.83762	6.73245	5.99764	5.27984	4.6894	5.03301	4.59753	5.63944	-0.469798	5.64954e-08	MED13L
ENSG00000148484	26.8091	25.5379	26.8106	24.6602	24.6364	31.5102	33.4727	32.4386	33.0717	29.5974	0.317832	5.65195e-08	RSU1
ENSG00000171004	1.9532	1.39476	1.82661	2.10802	1.80098	1.16511	1.00049	0.922264	1.10001	1.01565	-0.801924	5.84337e-08	HS6ST2
ENSG00000113732	75.4662	71.0406	71.7468	76.2386	61.3782	90.046	101.686	98.5651	97.488	86.5102	0.414869	5.89601e-08	ATP6V0E1
ENSG00000187535	3.6462	3.4088	3.84783	3.78719	3.83372	2.35751	2.39153	2.61497	2.55698	3.11382	-0.507089	5.90965e-08	IFT140
ENSG00000170989	91.1772	90.4902	91.9744	85.7456	82.9996	67.6769	67.3984	69.7572	68.4208	78.169	-0.331859	5.92893e-08	S1PR1
ENSG00000198912	4.21015	3.97258	4.51809	4.11568	3.61918	2.46507	1.96667	2.7299	2.22118	3.17044	-0.700509	5.9825e-08	C1orf174
ENSG00000100591	15.6555	15.3174	16.5357	15.9318	18.863	20.3821	21.6032	22.8323	21.8979	22.7431	0.409769	6.00634e-08	AHSA1
ENSG00000158006	2.76006	2.76138	2.84328	2.98402	1.97317	1.56524	1.51762	1.6692	1.55129	1.50218	-0.767585	6.02591e-08	PAFAH2
ENSG00000007866	0.669099	0.839866	0.555151	0.782701	0.849883	1.61947	1.82288	2.1848	2.49334	1.02613	1.30292	6.09912e-08	TEAD3
ENSG00000099377	1.39657	1.40687	1.44899	1.79166	1.55636	2.38207	2.73488	2.66729	3.0947	2.62829	0.827032	6.14324e-08	HSD3B7
ENSG00000048342	2.77267	2.863	2.63644	2.57669	2.18511	1.95647	1.65386	1.768	1.74037	1.65287	-0.568173	6.2819e-08	CC2D2A
ENSG00000104497	1.79692	1.52283	1.66961	1.59027	1.61986	2.55263	2.2928	2.54345	2.71828	2.41953	0.613451	6.31615e-08	SNX16
novel.22	0.309055	0.203398	0.473457	0.305655	0.21275	0.86355	0.714716	1.38136	0.97368	1.04762	1.73495	6.3223e-08	-
ENSG00000134684	9.2548	8.93276	9.06744	9.12331	8.29928	6.9695	6.54963	7.35523	7.21367	7.24654	-0.337419	6.39169e-08	YARS
ENSG00000104998	2.1974	2.49062	2.02766	2.19335	2.53792	3.73209	4.04275	4.47212	3.6965	3.06223	0.728365	6.40947e-08	IL27RA
ENSG00000164692	1.77974	1.93051	2.57158	2.24926	0.995136	0.932296	1.00742	0.880593	0.964428	0.697679	-1.08692	6.46526e-08	COL1A2
ENSG00000164283	81.4303	74.9246	91.9545	89.8574	33.306	193.338	195.802	202.769	196.208	166.257	1.3614	6.50464e-08	ESM1
ENSG00000116750	3.80984	3.31365	3.75544	3.43604	3.56504	2.186	2.51079	2.42635	2.66041	2.79701	-0.507135	6.52046e-08	UCHL5
ENSG00000187678	7.63876	7.52451	7.56161	7.47798	4.36551	11.9968	10.7284	12.3019	10.6834	11.1824	0.720226	6.67232e-08	SPRY4
ENSG00000173040	1.90944	2.08428	2.29683	2.33694	2.61163	1.26223	1.19004	1.25402	1.56241	1.56858	-0.719315	6.69906e-08	EVC2
ENSG00000118407	18.1745	16.8274	19.6549	17.9424	14.7517	12.6526	11.3724	10.8954	11.2778	14.4441	-0.52605	6.71592e-08	FILIP1
ENSG00000173327	26.2006	25.4724	26.3399	24.7291	23.3838	32.1917	30.4724	36.1477	33.6097	29.8308	0.363554	7.0609e-08	MAP3K11
ENSG00000157510	28.8545	28.0645	29.6182	25.8308	29.5158	37.0242	38.1886	38.7181	36.6115	32.363	0.366146	7.06511e-08	AFAP1L1
ENSG00000244509	2.28635	2.72346	2.52442	2.64384	1.34264	4.89296	4.01195	4.67816	5.95161	3.65367	1.01334	7.17191e-08	APOBEC3C
ENSG00000164109	1.25816	1.40765	1.3492	1.8561	1.35978	0.796156	0.768133	0.771851	0.935905	0.820984	-0.820866	7.17784e-08	MAD2L1
ENSG00000039650	10.2964	10.3453	9.82567	9.7059	10.3487	12.994	12.9589	12.6724	13.5325	12.2537	0.350143	7.21114e-08	PNKP
ENSG00000157259	8.09625	9.43754	8.86029	8.4969	10.0274	6.62429	7.03742	6.23085	6.52575	6.84366	-0.435159	7.23856e-08	GATAD1
ENSG00000177191	2.21019	2.12705	1.8358	1.36762	2.01897	3.39343	3.60546	3.78792	3.14082	3.56466	0.872198	7.27601e-08	B3GNT8
ENSG00000137266	4.12287	5.40245	4.71172	4.62862	6.14881	2.94558	2.83438	3.09136	2.66728	3.95349	-0.691982	7.35577e-08	SLC22A23
ENSG00000143952	5.50129	5.621	6.41398	6.18154	5.72056	4.33107	4.33631	4.24525	4.21431	4.65874	-0.434379	7.3688e-08	VPS54
ENSG00000133315	5.16135	6.69269	4.80101	4.56507	8.00731	2.50362	2.46582	2.09345	1.99956	4.13658	-1.14773	7.45612e-08	MACROD1
ENSG00000198478	5.82133	5.35738	6.17813	5.81552	5.5957	4.40667	4.48571	3.85483	4.18936	4.16212	-0.447065	7.46246e-08	SH3BGRL2
ENSG00000155893	0.307652	0.37964	0.330743	0.211297	0.324737	0.573088	0.720959	0.656089	0.834642	0.564887	1.10492	7.47206e-08	PXYLP1
ENSG00000154133	75.2138	79.4322	77.9428	74.8741	63.4877	96.5811	93.1028	105.519	96.6301	92.3341	0.384409	7.57247e-08	ROBO4
ENSG00000182287	15.8514	13.4826	12.6798	15.2231	16.6219	10.7336	10.4872	9.65691	10.7223	11.5515	-0.474757	7.6029e-08	AP1S2
ENSG00000151292	8.29693	7.71039	8.66486	7.71259	6.05368	5.36082	5.25814	5.0197	5.0125	5.66282	-0.544984	7.62649e-08	CSNK1G3
ENSG00000106785	1.51468	1.28365	1.15149	1.55845	1.23799	0.869374	0.831784	0.648982	0.659624	0.717187	-0.853111	7.80842e-08	TRIM14
ENSG00000137185	4.54266	5.21875	4.83162	4.89048	5.26725	7.55539	6.68071	6.14127	6.95242	7.34438	0.485393	7.83361e-08	ZSCAN9
ENSG00000089157	422.384	421.958	420.893	446.849	384.333	493.36	556.799	541.938	556.252	492.447	0.333062	7.92828e-08	RPLP0
ENSG00000108774	24.3595	21.2893	22.5341	20.6375	25.8925	30.0715	32.7824	31.2653	32.0457	28.2124	0.427691	7.92981e-08	RAB5C
ENSG00000169291	14.1754	14.3642	13.7399	13.2184	18.124	11.1247	10.7943	9.91134	9.71719	10.8835	-0.490216	7.97639e-08	SHE
ENSG00000167900	6.50025	8.85533	9.8071	7.94276	5.75146	4.21553	3.99012	3.61004	4.48908	5.10441	-0.858423	8.16442e-08	TK1
ENSG00000134250	3.12994	3.31032	3.35203	2.88366	2.46192	4.62615	4.58616	5.02393	4.53088	3.63981	0.566483	8.24557e-08	NOTCH2
ENSG00000181789	59.7122	56.8451	59.3773	50.0528	39.0731	34.2896	32.0049	35.8509	31.5945	39.8878	-0.610007	8.25981e-08	COPG1
ENSG00000134874	6.32605	6.37785	6.10637	5.81249	4.80203	4.23817	4.2966	4.29517	4.19188	3.50929	-0.51828	8.41899e-08	DZIP1
ENSG00000125834	5.75904	5.75121	6.23185	5.74484	4.14216	8.44102	8.20216	9.01964	8.02889	7.33172	0.571597	8.46631e-08	STK35
ENSG00000197019	5.03812	5.00941	5.84755	5.55427	5.18088	7.42204	6.93024	8.72449	9.5802	8.03037	0.611438	8.55251e-08	SERTAD1
ENSG00000089351	31.4006	30.5579	29.9499	28.6879	23.2664	39.7784	37.0964	43.6578	42.104	37.0273	0.47332	8.81849e-08	GRAMD1A
ENSG00000171115	52.1523	50.365	50.8819	49.5455	67.1079	30.5117	34.1842	30.5236	30.4647	45.5104	-0.657752	8.94442e-08	GIMAP8
ENSG00000168672	34.8065	34.657	37.0642	36.6065	31.2483	26.2849	24.3623	24.911	22.5447	29.9738	-0.444917	8.9964e-08	FAM84B
ENSG00000100592	2.20334	2.19381	2.25902	2.28685	1.54296	3.35667	2.91021	3.34887	3.24363	2.9636	0.596186	9.06619e-08	DAAM1
ENSG00000100722	2.30984	2.27175	2.37387	2.49185	2.00302	1.81893	1.53395	1.67688	1.59302	1.77924	-0.444929	9.20747e-08	ZC3H14
ENSG00000170027	90.5343	81.9904	92.7362	86.2411	73.0026	111.797	109.605	119.56	112.773	104.006	0.394038	9.21835e-08	YWHAG
ENSG00000129968	24.717	24.2666	23.6222	25.9129	23.4767	29.0241	29.4113	32.8411	35.0106	30.4183	0.361366	9.25931e-08	ABHD17A
ENSG00000117505	4.07112	4.03725	4.51611	4.27328	3.82391	5.76467	5.67	5.59763	5.45088	4.85854	0.400376	9.3122e-08	DR1
ENSG00000158683	3.32237	3.60531	3.85758	3.03075	3.27262	2.23698	2.35663	2.3191	1.86457	2.71154	-0.572597	9.58477e-08	PKD1L1
ENSG00000148634	3.27332	3.23617	3.42935	3.32484	3.46195	2.64403	2.63841	2.63167	2.72375	2.75742	-0.32091	9.6304e-08	HERC4
ENSG00000183726	37.1137	33.5503	35.7555	37.527	31.1403	47.1277	52.1054	49.0126	51.1696	40.1144	0.45239	9.72258e-08	TMEM50A
ENSG00000108064	6.89577	5.78382	7.19773	7.45299	6.58926	5.04636	4.30788	5.39284	4.60613	4.27449	-0.521074	9.81516e-08	TFAM
ENSG00000139697	5.75056	5.49799	5.98091	5.93134	4.69909	4.41844	4.17357	3.99971	3.88588	4.09344	-0.436412	9.85977e-08	SBNO1
ENSG00000138175	3.98502	4.42644	4.12599	4.06241	4.44219	3.15407	2.90631	3.06677	2.78249	2.75818	-0.52166	9.88033e-08	ARL3
ENSG00000119979	6.0078	5.40765	6.26541	5.56266	4.99371	4.17697	4.22384	2.96274	3.85221	3.77006	-0.571807	9.9508e-08	FAM45A
ENSG00000124193	48.224	47.538	46.7572	49.1174	52.2765	35.9209	35.0727	34.6913	32.5334	43.4325	-0.425214	9.97289e-08	SRSF6
ENSG00000196696	1.33338	1.66396	1.23983	1.57927	1.95421	0.972073	0.547084	0.694547	0.828122	0.942243	-0.963228	9.99483e-08	PDXDC2P
ENSG00000107020	3.56684	2.86909	2.38239	3.43324	3.83463	5.45362	5.91457	6.36772	7.03684	4.76166	0.874102	1.03344e-07	PLGRKT
ENSG00000143499	3.18703	2.78668	3.11289	2.53577	2.63734	4.31552	4.62494	4.44658	4.53083	3.48486	0.587061	1.04862e-07	SMYD2
ENSG00000164252	6.5471	6.72559	5.94529	6.33669	6.52479	4.7419	5.39047	4.19104	4.62358	4.44083	-0.45661	1.07745e-07	AGGF1
ENSG00000188042	6.56952	5.85598	5.73946	5.73303	3.95738	3.22858	3.6341	3.53778	3.23306	3.64997	-0.686221	1.08363e-07	ARL4C
ENSG00000033867	7.37709	7.07169	6.99162	7.27059	5.79324	11.4155	10.2545	9.93279	10.2542	7.99852	0.531709	1.08707e-07	SLC4A7
ENSG00000177105	30.5848	30.2811	29.0568	28.3297	24.6124	33.7852	38.7419	42.9291	41.3049	39.7223	0.460639	1.09227e-07	RHOG
ENSG00000174705	17.9093	16.9524	17.5142	13.1205	10.7655	26.7696	24.0099	28.5317	27.1262	20.0906	0.730812	1.09229e-07	SH3PXD2B
ENSG00000175063	4.60108	4.44122	4.44353	5.14456	4.95513	1.29402	2.34089	2.5628	2.65756	2.85937	-1.01288	1.12286e-07	UBE2C
ENSG00000184867	16.6696	17.3392	18.0503	16.5572	13.3024	10.9128	11.1465	11.5317	10.3336	13.1827	-0.519585	1.12627e-07	ARMCX2
ENSG00000198722	16.8695	18.3403	16.6399	15.2038	15.6469	12.8679	12.9723	12.9873	11.71	13.4354	-0.370097	1.12778e-07	UNC13B
ENSG00000112149	0.209127	0.236556	0.370958	0.189591	0.415688	0.732568	0.771382	1.03323	0.830435	1.19404	1.66381	1.14107e-07	CD83
ENSG00000110721	6.39299	6.7059	6.46719	7.37923	6.54878	4.32292	5.00393	5.39474	4.70139	4.71065	-0.473768	1.1523e-07	CHKA
ENSG00000107186	13.4661	14.6874	13.971	11.8063	17.5057	10.3755	9.26345	9.03501	9.46559	11.0416	-0.538788	1.15521e-07	MPDZ
ENSG00000066056	196.811	199.678	203.876	193.811	183.687	232.208	220.769	242.584	236.025	245.189	0.267192	1.16358e-07	TIE1
ENSG00000134574	11.3311	10.6668	11.3238	11.2949	8.3159	14.9279	15.6417	15.6735	15.4055	13.3159	0.503162	1.16821e-07	DDB2
ENSG00000137752	2.20452	2.09145	2.03407	2.12752	2.23474	1.15715	1.19395	1.28542	1.33493	1.50812	-0.722578	1.17917e-07	CASP1
ENSG00000139679	11.0532	10.2075	10.9834	12.8582	9.77809	7.96899	8.016	7.53622	8.28233	8.23159	-0.45418	1.18429e-07	LPAR6
ENSG00000124198	11.9582	12.4641	12.0205	12.247	9.10519	8.88332	8.10697	7.8295	7.91734	8.61223	-0.482271	1.23147e-07	ARFGEF2
ENSG00000104765	31.2465	28.5382	29.4325	31.9117	27.1631	20.8918	19.493	20.4547	18.7796	26.0255	-0.488748	1.23402e-07	BNIP3L
ENSG00000105402	20.1883	19.2063	18.924	19.415	17.359	22.8101	24.369	26.1162	25.1249	22.6188	0.348529	1.26268e-07	NAPA
ENSG00000135547	1.15131	0.8465	1.08494	1.19597	0.326926	0.195145	0.292875	0.0693688	0.300168	0.134154	-2.21483	1.27057e-07	HEY2
ENSG00000147676	0.575023	0.64177	0.782	0.503929	0.362854	0.155945	0.195036	0.0923907	0.055355	0.214411	-2.00228	1.27394e-07	MAL2
ENSG00000136810	46.401	43.8649	45.9536	51.9305	51.2221	58.756	73.9269	65.489	74.9273	60.2663	0.477004	1.27745e-07	TXN
ENSG00000197385	0.241781	0.182328	0.1787	0.109597	0.106799	0.80142	0.574051	0.407901	0.620672	0.507116	1.84958	1.2806e-07	ZNF860
ENSG00000183578	14.6486	14.5184	14.1779	15.23	8.05516	6.83133	6.21064	7.70535	7.83421	3.63055	-1.04787	1.28387e-07	TNFAIP8L3
ENSG00000181830	7.74922	8.51798	8.08962	8.04405	5.64692	12.2427	11.2857	12.1132	10.8877	10.1758	0.577207	1.28913e-07	SLC35C1
ENSG00000084207	163.52	166.924	158.761	167.074	131.699	196.733	231.608	237.865	236.368	192.147	0.474454	1.29023e-07	GSTP1
ENSG00000149541	10.9393	11.7615	10.9031	12.1513	11.1131	14.9805	15.9253	17.2024	16.5782	13.3779	0.456642	1.29236e-07	B3GAT3
ENSG00000171522	6.3404	6.33839	6.22699	7.44846	4.87655	9.61784	9.6943	9.61661	10.4497	7.92183	0.600383	1.30582e-07	PTGER4
ENSG00000198858	22.7226	19.6368	19.8771	21.2852	15.1017	28.5405	30.1344	28.7428	30.5637	25.5548	0.54255	1.30821e-07	R3HDM4
ENSG00000121152	1.72484	1.4338	1.99229	1.81826	1.33647	0.688968	0.755096	0.928078	0.752983	1.00959	-1.00332	1.34547e-07	NCAPH
ENSG00000198677	12.8369	13.1457	13.5903	14.2378	13.7932	11.2299	10.9126	9.68871	10.1676	11.3377	-0.342086	1.38255e-07	TTC37
ENSG00000172578	2.22556	2.33552	2.23376	2.23242	1.61917	3.91107	3.48887	3.55784	3.79279	2.50467	0.698183	1.38312e-07	KLHL6
ENSG00000116260	46.6728	47.558	48.4904	46.7808	30.0059	28.5386	29.5653	30.121	29.6972	26.2297	-0.606556	1.39507e-07	QSOX1
ENSG00000149503	4.71807	5.08085	5.24047	5.25005	4.36288	2.96299	3.26037	3.27315	3.52314	3.91857	-0.540591	1.39674e-07	INCENP
ENSG00000008283	17.1405	14.8511	15.6297	15.4272	14.5327	12.177	11.9837	12.6403	11.8132	12.6373	-0.339961	1.40369e-07	CYB561
ENSG00000154856	0.210187	0.330354	0.333592	0.180523	0.31832	0.0900039	0.0337695	0.0853172	0.0532468	0.0618737	-2.07788	1.4326e-07	APCDD1
ENSG00000101255	11.1999	10.343	10.9183	10.6396	10.409	14.6072	15.8769	16.5002	17.7483	12.0644	0.521243	1.43635e-07	TRIB3
ENSG00000189043	15.7705	15.5761	14.7415	15.2024	17.4018	20.2064	23.9484	19.3919	24.2585	20.0437	0.453841	1.44869e-07	NDUFA4
ENSG00000124783	13.7004	12.2091	13.5949	13.8175	9.55402	8.5936	8.88311	8.47189	8.15304	9.5042	-0.527494	1.44894e-07	SSR1
ENSG00000119048	10.8675	10.467	11.2864	13.7461	13.206	6.97082	8.02932	7.12568	7.82701	9.60909	-0.591363	1.45741e-07	UBE2B
ENSG00000006451	120.152	110.774	113.056	117.725	105.53	162.746	173.039	166.5	171.546	121.853	0.48828	1.46147e-07	RALA
ENSG00000103257	5.02955	5.14066	4.43623	4.09494	5.67606	7.00164	6.52761	8.73562	8.94985	6.75501	0.638365	1.47278e-07	SLC7A5
ENSG00000166165	0.468019	0.445813	0.873885	0.625281	0.615533	1.29153	1.35349	2.13721	1.16192	1.60735	1.31382	1.4982e-07	CKB
ENSG00000071794	4.46372	4.30599	5.18827	5.32308	4.48746	3.43335	3.58696	2.69344	3.26742	3.36747	-0.539888	1.52042e-07	HLTF
ENSG00000165119	97.0995	90.2295	92.7327	94.8701	105.038	77.6319	81.0906	76.7029	79.3033	79.6813	-0.283413	1.53205e-07	HNRNPK
ENSG00000168005	10.2586	11.8691	10.6566	10.4257	10.7477	13.0002	14.3471	15.8958	18.4434	15.3924	0.514088	1.54006e-07	C11orf84
ENSG00000065548	18.156	17.8577	18.1181	20.5605	20.1046	13.7313	15.3061	14.4608	13.8932	15.4342	-0.381295	1.57111e-07	ZC3H15
ENSG00000065615	1.42611	1.3461	1.5856	1.35475	1.55525	0.980776	1.10396	0.874887	0.860497	0.998639	-0.594878	1.59347e-07	CYB5R4
ENSG00000128915	2.80471	2.93567	2.72065	2.77724	2.57158	2.20877	2.24384	1.88042	2.04375	2.1207	-0.394868	1.5942e-07	ICE2
ENSG00000173960	2.95105	2.82604	2.62581	2.66671	2.9361	4.40305	4.58681	4.33643	4.41296	3.13374	0.575073	1.59471e-07	UBXN2A
ENSG00000183155	7.49431	7.63871	7.34274	6.96591	6.04368	9.61193	10.0759	10.1199	10.3138	9.28116	0.479877	1.59765e-07	RABIF
ENSG00000160310	15.9286	15.3845	15.347	15.7169	17.0139	12.3053	12.1851	12.7518	11.8431	13.948	-0.333029	1.60088e-07	PRMT2
ENSG00000118257	39.2498	40.9341	40.0566	37.1359	31.2258	58.3248	59.1755	54.9421	57.4822	42.5244	0.530708	1.61118e-07	NRP2
ENSG00000166257	0.437647	0.49662	0.690059	0.591996	0.610196	1.04874	1.05322	0.937574	0.809171	1.04906	0.788885	1.61641e-07	SCN3B
ENSG00000177917	6.92975	5.56033	6.25061	6.95869	7.55152	8.81994	10.1874	9.10295	10.2805	9.11328	0.51304	1.61769e-07	ARL6IP6
ENSG00000120805	15.1718	12.3433	14.0886	14.5206	11.9085	9.71643	10.3188	9.59802	9.45715	10.8195	-0.445982	1.62559e-07	ARL1
ENSG00000167543	6.67514	6.70444	6.26481	6.67759	6.84115	7.82897	8.78303	9.25043	8.47549	9.42757	0.399643	1.63579e-07	TP53I13
ENSG00000011028	40.6541	42.2267	44.234	40.853	40.0663	30.7559	27.8219	31.6438	30.0393	37.0306	-0.403232	1.65889e-07	MRC2
ENSG00000253930	1.34172	1.40095	1.46461	1.87136	2.65721	5.87794	4.09576	3.97991	4.96775	4.23325	1.3914	1.65961e-07	RP11-1149O23.2
ENSG00000013563	6.24014	5.24352	5.92983	6.7973	4.93014	8.51915	9.03844	9.14636	9.59299	7.1525	0.577533	1.70949e-07	DNASE1L1
ENSG00000103152	20.0677	24.7503	20.7122	22.4273	22.0594	27.5873	29.8038	30.6025	32.3876	27.6358	0.427253	1.78456e-07	MPG
ENSG00000088305	1.71816	2.05594	2.14097	1.54478	2.69885	1.24513	1.21369	0.780272	0.902179	1.08541	-0.96188	1.7896e-07	DNMT3B
ENSG00000162976	5.49074	6.09321	5.71566	7.02133	5.51449	9.35246	8.90985	8.24637	8.5962	7.9739	0.53063	1.79357e-07	PQLC3
ENSG00000163535	1.0044	1.09661	0.939234	1.21739	0.843229	0.473723	0.455462	0.610435	0.651599	0.50885	-0.915278	1.80906e-07	SGOL2
ENSG00000134852	3.05749	3.34343	3.32647	3.20259	2.5861	2.27887	2.02478	2.43023	2.16847	2.16757	-0.485571	1.81481e-07	CLOCK
ENSG00000133794	1.18273	0.919916	1.05766	0.930461	1.08804	1.75841	1.71073	1.43232	1.64669	1.55812	0.647109	1.84232e-07	ARNTL
ENSG00000085662	17.9989	16.0601	16.569	17.0991	15.5608	22.2791	24.1452	25.3866	24.8315	18.6537	0.469476	1.88382e-07	AKR1B1
ENSG00000249992	0.834043	1.70639	1.09351	1.87388	2.0869	0.622845	0.221392	0.419504	0.349085	0.574661	-1.79284	1.89287e-07	TMEM158
ENSG00000111665	0.848989	0.694603	0.938653	0.716961	0.854238	0.410025	0.295849	0.325141	0.447827	0.487859	-1.04053	1.89353e-07	CDCA3
ENSG00000128918	2.62306	2.79459	2.52257	2.72367	3.20458	1.64056	1.83886	1.9333	1.84979	2.21772	-0.550592	1.89859e-07	ALDH1A2
ENSG00000163644	1.25464	1.42312	1.33327	1.4729	1.93075	0.940802	0.67068	0.668859	0.873837	1.05099	-0.818889	1.95109e-07	PPM1K
ENSG00000177606	62.0671	64.8718	66.447	67.7013	49.1366	82.0975	84.9068	83.6831	86.978	82.459	0.43779	1.96597e-07	JUN
ENSG00000120738	11.2926	12.532	11.9482	11.9091	5.2195	4.67809	4.7327	4.26169	4.1144	7.14807	-1.08396	1.99732e-07	EGR1
ENSG00000176853	8.89173	8.7032	9.6003	8.46414	7.50257	11.9669	11.7897	10.6537	11.049	11.2405	0.394501	2.00675e-07	FAM91A1
ENSG00000100368	11.6236	11.1967	12.2334	10.9431	7.6368	16.6411	15.5603	15.8577	16.0628	15.3705	0.568906	2.02541e-07	CSF2RB
ENSG00000135604	2.62841	2.74919	2.99724	2.5376	3.87722	5.02986	4.86274	5.13358	4.86334	4.80487	0.732102	2.04229e-07	STX11
ENSG00000095752	0	0.0668219	0	0	0.0186385	0.489523	0.375687	0.688139	0.331729	0.13767	4.5424	2.0696e-07	IL11
ENSG00000138449	13.2703	12.572	14.1802	14.2468	8.692	8.18055	8.54371	7.97739	8.00981	8.11012	-0.624207	2.07429e-07	SLC40A1
ENSG00000134138	3.32436	3.61437	3.69365	3.52163	3.58692	2.77403	2.7941	2.86437	2.4324	2.73567	-0.384078	2.07604e-07	MEIS2
ENSG00000271122	1.20531	1.37402	1.11067	1.33397	1.48165	1.78298	2.10249	2.27866	2.45622	2.21797	0.732158	2.08552e-07	RP11-379H18.1
ENSG00000128245	30.7414	25.6117	30.9497	30.0079	24.5366	38.9837	39.7621	47.9549	44.8933	34.3281	0.538218	2.09949e-07	YWHAH
ENSG00000145555	44.043	44.0228	47.8991	39.9201	39.7256	34.4345	33.5757	32.3595	32.1727	36.4301	-0.351545	2.11353e-07	MYO10
ENSG00000187079	8.77942	8.82175	9.11251	7.63769	7.64573	6.76841	6.5228	6.18595	6.61003	6.19413	-0.378987	2.15246e-07	TEAD1
ENSG00000172840	1.37557	1.27324	1.11545	1.12592	1.2559	0.70347	0.879808	0.659261	0.79452	0.820663	-0.672404	2.19535e-07	PDP2
ENSG00000225830	2.68084	2.58225	2.55751	2.76399	2.2404	1.67674	1.48236	1.66504	1.66265	2.12803	-0.571553	2.21328e-07	ERCC6
ENSG00000115159	4.84238	4.37369	4.13997	4.48999	3.56939	3.23951	2.88907	2.9409	2.90131	3.16066	-0.498274	2.21466e-07	GPD2
ENSG00000162413	7.93581	7.80204	7.35106	6.1926	6.18958	10.9805	10.8862	11.471	11.152	8.15251	0.570235	2.22845e-07	KLHL21
ENSG00000171444	1.6814	1.80449	1.87877	1.78902	1.51154	2.41661	2.25028	2.17588	2.4618	2.15032	0.403443	2.23729e-07	MCC
ENSG00000109743	2.18412	2.13619	1.85887	2.74012	1.40329	3.62977	3.97344	3.70071	3.88655	3.16712	0.835327	2.25319e-07	BST1
ENSG00000179361	1.42876	1.10138	1.44555	1.59273	1.32233	2.19093	1.81997	2.45888	2.08858	2.42697	0.674644	2.2576e-07	ARID3B
ENSG00000125772	3.67306	3.7713	3.21073	3.88226	4.97434	2.29078	2.29101	1.65983	1.93794	3.0289	-0.800334	2.34374e-07	GPCPD1
ENSG00000184635	0.659057	0.547713	0.536814	0.646265	0.651831	0.936233	0.958024	1.17995	1.48901	1.42934	0.978413	2.35786e-07	ZNF93
ENSG00000075218	2.15428	2.17387	2.77667	2.3886	1.26747	0.896672	1.08815	1.03093	0.820581	1.31471	-1.0605	2.39915e-07	GTSE1
ENSG00000138346	1.1482	1.25906	0.982416	1.18789	1.33997	0.586144	0.61853	0.729254	0.403116	0.717752	-0.955488	2.40876e-07	DNA2
ENSG00000078596	0.705205	0.638159	0.42645	0.668387	1.26219	1.50682	2.44627	1.73051	1.94404	3.97417	1.63881	2.45355e-07	ITM2A
ENSG00000090686	15.2713	14.9345	14.404	15.5581	14.8035	11.7839	11.8129	11.3653	10.7692	13.3645	-0.343051	2.45923e-07	USP48
ENSG00000127314	7.85036	7.00567	7.35844	7.82413	6.40293	9.38039	9.88733	10.1418	9.89944	8.53705	0.393264	2.47156e-07	RAP1B
ENSG00000198937	11.8956	12.9752	12.0576	14.7322	12.7877	18.3386	20.8582	17.7136	20.9601	19.7026	0.597031	2.48372e-07	CCDC167
ENSG00000109171	7.07427	6.41081	6.36369	6.10279	5.45605	4.78266	4.31695	4.16769	4.47215	5.01635	-0.462746	2.48629e-07	SLAIN2
ENSG00000102935	1.15456	1.23656	1.22492	1.31832	1.64894	0.574706	0.743553	0.57061	0.47131	1.00815	-0.968644	2.49587e-07	ZNF423
ENSG00000144744	11.0094	11.1226	11.8631	10.8748	12.3432	8.12537	9.54722	8.8393	8.3679	8.97614	-0.385268	2.50171e-07	UBA3
ENSG00000153246	5.8268	6.55918	6.8509	6.32196	4.82857	4.32182	4.59174	4.1887	4.29243	3.62528	-0.531354	2.50773e-07	PLA2R1
ENSG00000054148	32.1985	28.5433	28.9252	35.2981	36.1801	41.5684	50.797	45.4284	46.3943	40.4493	0.478437	2.51696e-07	PHPT1
ENSG00000185728	14.8173	13.312	14.7123	14.5839	13.4819	18.7179	19.4299	17.1331	18.3819	16.5073	0.347004	2.5312e-07	YTHDF3
ENSG00000107282	0.332042	0.182105	0.107089	0.209804	0.121906	0.445699	0.491441	0.630502	0.60054	0.440838	1.47041	2.5541e-07	APBA1
ENSG00000171503	3.17528	3.98567	3.50405	4.03277	3.72296	2.08999	2.7694	2.41219	2.35239	2.65986	-0.586972	2.60075e-07	ETFDH
ENSG00000169221	17.1157	15.2398	15.9375	15.2054	10.7236	10.1139	9.81641	10.2085	9.59872	10.6214	-0.558791	2.64406e-07	TBC1D10B
ENSG00000162367	14.5676	14.1115	14.5366	13.2799	14.149	11.2818	10.4219	11.1193	9.92641	12.2249	-0.361348	2.66413e-07	TAL1
ENSG00000153048	3.60727	3.85104	3.40847	3.67641	4.32047	4.73159	5.26591	5.64817	5.61738	5.04397	0.477292	2.70159e-07	CARHSP1
ENSG00000150457	22.8538	24.0834	26.0712	22.8559	20.6703	29.8441	29.563	29.088	30.7256	28.918	0.346531	2.72087e-07	LATS2
ENSG00000162729	2.76471	2.57072	2.74453	3.03532	3.63005	4.72342	3.94881	4.69482	5.02993	5.22538	0.676358	2.74052e-07	IGSF8
ENSG00000102870	7.83056	7.09586	7.46237	6.48217	6.39572	4.87216	5.08847	4.98752	4.81401	5.88997	-0.457992	2.75341e-07	ZNF629
ENSG00000130054	0.0491485	0.0593011	0.101712	0.0148524	0.0372167	0.22215	0.266723	0.568572	0.220795	0.366524	2.65338	2.7702e-07	FAM155B
ENSG00000148798	0.020348	0.147307	0.0360941	0.0184471	0.0462243	0.496651	0.393392	0.372708	0.470115	0.189681	2.8348	2.77356e-07	INA
ENSG00000131013	8.94481	9.06122	9.23351	9.34812	9.5014	7.03038	7.25607	6.32363	6.36241	7.29594	-0.428226	2.79424e-07	PPIL4
ENSG00000115970	2.57059	2.68601	2.66126	2.56518	1.845	1.75121	1.51484	1.5065	1.63341	1.81444	-0.582622	2.82706e-07	THADA
ENSG00000149212	9.3857	8.29798	9.97459	9.05008	9.02096	7.61205	7.45028	7.08916	6.82225	6.56487	-0.363667	2.862e-07	SESN3
ENSG00000107185	8.40744	8.11811	8.47281	7.22	7.32481	10.632	9.5608	10.2961	10.1835	10.0593	0.360592	2.86596e-07	RGP1
ENSG00000122390	3.01965	2.67981	3.13317	2.68471	3.05464	4.03665	3.72509	4.00129	4.14146	4.02124	0.451191	2.91341e-07	NAA60
ENSG00000111269	9.40402	8.05487	10.5856	9.04222	8.22533	7.00098	5.40706	6.44789	6.30956	6.48487	-0.516116	2.92546e-07	CREBL2
ENSG00000134308	109.412	103.791	108.775	110.528	86.1166	138.822	148.639	144.421	147.83	121.216	0.434769	2.95677e-07	YWHAQ
ENSG00000146197	1.26913	1.35875	1.31586	1.43416	1.71901	0.735231	0.918521	0.913306	0.731319	0.99977	-0.727655	2.96259e-07	SCUBE3
ENSG00000268894	1.44569	1.18365	0.976921	1.1234	2.89318	0.404515	0.140099	0.0995497	0.132543	0.673824	-2.38755	2.9816e-07	PLCE1-AS1
ENSG00000103510	5.41549	6.27334	4.50712	5.73473	7.05286	2.98945	3.11797	3.39275	3.25646	4.62402	-0.738476	2.99513e-07	KAT8
ENSG00000174099	14.1343	13.3247	14.3585	12.4948	11.0468	8.41559	9.21847	8.60243	8.01088	11.0592	-0.528045	3.01526e-07	MSRB3
ENSG00000116704	1.82445	1.63169	1.91149	1.50893	1.5108	2.5077	2.32328	2.54055	2.58826	2.32731	0.553663	3.03828e-07	SLC35D1
ENSG00000105486	4.10902	3.96263	4.08773	4.3415	3.30073	5.57632	5.3815	5.29131	6.11141	5.0792	0.472611	3.05204e-07	LIG1
ENSG00000165699	5.57875	6.44701	6.10104	6.104	6.08795	4.82129	3.75965	4.06717	4.18905	5.10149	-0.466203	3.06254e-07	TSC1
ENSG00000106344	2.03871	2.07362	2.11321	2.41176	2.03954	1.6969	1.47574	1.64582	1.31636	1.56826	-0.470162	3.07134e-07	RBM28
ENSG00000154222	4.90341	5.44533	5.57037	5.04178	5.93816	7.07323	6.54247	7.77134	7.06779	7.06485	0.399695	3.07803e-07	CC2D1B
ENSG00000131725	6.00805	5.59259	5.30091	5.46098	4.94044	7.66598	7.51442	6.75732	8.16343	7.01536	0.445135	3.10084e-07	WDR44
ENSG00000160818	5.61575	5.12207	5.65096	5.27921	6.45155	3.97824	3.90499	4.34247	3.75142	4.2128	-0.479466	3.20115e-07	GPATCH4
ENSG00000211445	2.86683	2.35446	2.58538	2.94847	1.62358	1.43736	1.17665	1.34703	1.25233	1.07795	-0.970701	3.20388e-07	GPX3
ENSG00000103653	17.6805	19.5145	19.7003	17.6852	15.5887	22.6806	23.4653	25.2688	24.3878	22.4626	0.391769	3.21917e-07	CSK
ENSG00000165891	1.51244	1.6235	1.39692	1.0591	0.718754	2.9325	2.67462	2.93621	3.57464	1.62379	1.12577	3.22102e-07	E2F7
ENSG00000198265	4.16852	4.14032	4.32945	3.77911	3.72178	3.29444	3.02974	3.04832	2.90266	3.29553	-0.37012	3.2325e-07	HELZ
ENSG00000158246	0.471982	0.226117	0.29549	0.402721	0.126141	0.727848	1.15827	1.01708	1.0958	0.828188	1.68665	3.2394e-07	FAM46B
ENSG00000134780	1.92996	1.98416	1.97506	1.79108	2.36076	2.92156	2.98639	3.36882	2.8473	2.70395	0.558764	3.25633e-07	DAGLA
ENSG00000146066	30.7069	34.8235	33.1703	36.404	27.1276	21.353	20.2295	23.9098	23.6861	22.2941	-0.539792	3.26684e-07	HIGD2A
ENSG00000182492	1214.27	1284.49	1250.42	1225.24	675.924	629.142	613.995	662.428	580.181	829.521	-0.769195	3.26991e-07	BGN
ENSG00000163092	0.0353383	0.0776622	0.0671619	0.0823811	0.0191137	0.228183	0.282528	0.194671	0.335326	0.0941195	2.01717	3.28181e-07	XIRP2
ENSG00000160299	4.68555	5.25035	5.07087	4.46253	4.44892	3.53231	3.2875	3.5495	3.70182	3.9736	-0.405805	3.28478e-07	PCNT
ENSG00000107611	1.19826	1.22439	1.03176	0.955055	1.04346	0.654444	0.726483	0.736417	0.797844	0.726048	-0.581799	3.32326e-07	CUBN
ENSG00000170545	2.75321	1.77244	2.57298	2.41225	2.95231	3.8252	4.45607	4.09708	4.67821	3.53109	0.721734	3.32821e-07	SMAGP
ENSG00000116396	6.16419	7.3229	6.35337	5.53094	5.16325	4.22383	3.91661	4.00916	3.54956	4.90655	-0.566548	3.35121e-07	KCNC4
ENSG00000107537	3.38347	4.08239	3.3458	4.47769	5.19775	2.03909	1.70162	1.89334	2.48964	2.99088	-0.883174	3.42741e-07	PHYH
ENSG00000064601	45.6034	46.3271	45.5447	44.814	36.8531	55.8094	56.022	57.8169	57.4423	53.7298	0.358098	3.42878e-07	CTSA
ENSG00000040199	1.02092	1.07625	0.947485	0.982803	0.912546	1.46524	1.33334	1.58285	1.61098	1.23131	0.549893	3.46932e-07	PHLPP2
ENSG00000100342	12.6295	13.6604	13.7697	13.4652	15.7598	10.1503	10.7979	11.2928	10.1076	10.1185	-0.402981	3.48333e-07	APOL1
ENSG00000253522	0.68573	0.82738	0.988305	0.595768	0.432712	1.62723	1.91883	1.65267	1.29274	1.65134	1.2128	3.49426e-07	MIR146A
ENSG00000115866	7.53423	6.92167	6.69679	7.48375	5.53151	9.31317	11.1996	9.48963	9.5391	9.11502	0.511645	3.50327e-07	DARS
ENSG00000135631	20.2375	19.176	20.8685	17.1212	16.3483	24.1758	24.3817	26.8606	26.278	23.3283	0.415767	3.57921e-07	RAB11FIP5
ENSG00000121621	0.492942	0.573526	0.449691	0.395819	0.447924	0.140051	0.12898	0.135776	0.176255	0.24945	-1.50194	3.58833e-07	KIF18A
ENSG00000188107	0.111692	0.108044	0.129805	0.10475	0.177903	0.0313353	0.031352	0.0556942	0.0556144	0.0179513	-1.72892	3.6064e-07	EYS
ENSG00000158402	0.539419	0.449083	0.612379	0.782444	0.588188	0.195053	0.131731	0.208008	0.0830839	0.241362	-1.78463	3.66748e-07	CDC25C
ENSG00000158859	0.922482	0.742665	0.80124	0.911286	0.47211	1.35728	1.45007	2.01167	1.94755	1.0497	1.02496	3.70501e-07	ADAMTS4
ENSG00000081923	19.1046	18.5672	20.9152	18.6908	17.4751	14.4471	15.1555	13.2629	13.4723	16.1967	-0.385242	3.73274e-07	ATP8B1
ENSG00000177084	2.28001	2.23518	2.33465	2.1352	1.85538	1.3383	1.3332	1.56456	1.41371	1.81544	-0.536804	3.76386e-07	POLE
ENSG00000071282	1.89109	2.04308	1.23226	1.95935	2.19182	0.610549	0.922858	0.613895	1.04027	1.13326	-1.1109	3.77342e-07	LMCD1
ENSG00000006210	0.307679	0.308258	0.233903	0.328746	0.366117	0.546346	0.592606	1.19705	0.655847	0.758007	1.27619	3.77644e-07	CX3CL1
ENSG00000135457	7.31829	7.24434	7.7706	7.67811	6.95955	5.34225	4.92947	5.48178	4.99434	6.26151	-0.451581	3.78127e-07	TFCP2
ENSG00000108010	10.879	11.3283	11.396	11.9482	10.8556	13.9706	15.8029	15.4376	16.1618	12.8187	0.395097	3.8172e-07	GLRX3
ENSG00000067082	62.5851	61.9359	62.5367	61.661	40.0361	89.6377	89.9666	87.2288	86.444	76.5699	0.574152	3.82955e-07	KLF6
ENSG00000115694	30.5316	29.339	29.5317	29.6049	24.964	35.053	36.7742	39.5456	38.571	34.5461	0.35807	3.85456e-07	STK25
ENSG00000164091	25.0761	25.1337	26.0185	25.0548	23.2746	31.896	30.5279	30.9041	29.6772	28.3953	0.281924	3.87419e-07	WDR82
ENSG00000241399	2.12963	1.82496	1.73141	1.91606	1.4538	0.962589	0.95216	0.995416	0.512526	1.15804	-0.979346	3.88175e-07	CD302
ENSG00000147854	11.2678	11.0063	11.6103	11.5071	11.0519	9.82054	9.47584	8.70924	9.33482	9.32974	-0.274044	3.95784e-07	UHRF2
ENSG00000149554	2.18546	1.78717	1.99168	2.09037	1.31329	2.95441	3.33569	3.45024	3.68656	2.42041	0.761243	3.98822e-07	CHEK1
ENSG00000081041	1.84084	2.30043	1.47719	1.66888	2.98701	3.01125	4.05844	5.49293	4.64121	5.96516	1.16627	4.00554e-07	CXCL2
ENSG00000172031	6.68834	5.78816	5.62117	6.9638	5.48482	8.42247	10.6097	9.23529	9.27829	7.86834	0.573293	4.0141e-07	EPHX4
ENSG00000166986	16.3987	16.6173	16.5936	16.1134	13.2038	20.6762	19.8655	22.2479	21.6847	19.3677	0.396431	4.02208e-07	MARS
ENSG00000243449	53.813	57.4005	52.587	65.3422	59.4637	71.8694	86.8428	79.3424	79.8147	73.5431	0.438343	4.02523e-07	C4orf48
ENSG00000137075	11.343	11.796	10.9438	11.167	8.77579	15.4149	14.125	16.3148	14.951	13.3695	0.458271	4.04754e-07	RNF38
ENSG00000123342	0.042216	0.0509365	0.124807	0.0382723	0.0532786	0.216257	0.300695	0.393412	0.555406	0.183648	2.40747	4.07747e-07	MMP19
ENSG00000168685	0.141036	0.235619	0.153954	0.177038	0.164302	0.490368	0.640272	0.564772	0.689288	0.22249	1.57734	4.10536e-07	IL7R
ENSG00000176393	23.4896	20.9314	22.8782	22.82	21.021	26.4619	28.1896	26.5981	28.0881	27.3752	0.299352	4.17744e-07	RNPEP
ENSG00000197860	1.99017	1.625	1.69411	1.9909	1.82748	2.74002	2.7001	2.67943	2.5875	2.43097	0.526538	4.18497e-07	SGTB
ENSG00000081320	2.21812	2.35082	2.59648	2.1649	2.34543	1.79743	1.15901	1.37741	1.63513	1.56475	-0.630191	4.18783e-07	STK17B
ENSG00000140545	14.3374	14.6363	15.2235	12.998	10.529	19.2371	19.1876	20.6168	20.2633	16.8969	0.506958	4.21493e-07	MFGE8
ENSG00000135272	7.06371	6.51181	7.34983	8.22209	6.8008	5.1204	5.37108	4.57874	5.14503	5.87589	-0.461993	4.22095e-07	MDFIC
ENSG00000204381	0.899175	0.681227	1.16843	0.94788	0.665047	2.26842	2.04267	1.97559	1.99289	1.15009	1.11567	4.27555e-07	LAYN
ENSG00000215193	3.80789	3.58833	3.60419	3.67815	3.93152	2.92938	2.51637	3.00063	2.26698	2.99015	-0.441287	4.30597e-07	PEX26
ENSG00000063245	51.6003	50.1333	51.2819	49.4063	44.8413	60.2644	59.4933	68.062	67.4232	58.5695	0.344139	4.41538e-07	EPN1
ENSG00000139263	7.564	7.27898	7.27267	6.645	11.599	4.84093	4.72244	3.92562	4.55364	5.85508	-0.756875	4.43882e-07	LRIG3
ENSG00000181467	14.2106	13.6481	13.5193	14.609	9.34964	19.7785	20.0119	22.1391	20.6748	16.4212	0.600705	4.45127e-07	RAP2B
ENSG00000105011	2.73935	3.20192	3.29006	2.81975	1.81503	1.16079	1.21948	1.45796	1.48334	1.64919	-0.988407	4.50619e-07	ASF1B
ENSG00000144152	0.419772	0.624061	0.700287	0.634264	0.438955	0.243946	0.183058	0.29869	0.279019	0.214286	-1.20671	4.52102e-07	FBLN7
ENSG00000105778	4.1093	4.19856	4.49055	4.78405	3.89467	5.94688	5.93192	5.23333	5.81792	5.20583	0.389938	4.53684e-07	AVL9
ENSG00000102743	3.18522	3.53012	4.85652	3.60147	3.49596	1.71471	2.47633	2.10462	1.72262	2.16853	-0.877136	4.60537e-07	SLC25A15
ENSG00000141551	15.7622	16.3845	16.1167	15.3278	15.1329	19.0309	17.9441	18.8116	19.3588	18.2624	0.247026	4.68308e-07	CSNK1D
ENSG00000068745	9.03634	8.99177	8.80248	9.87726	10.7552	11.4342	12.0972	12.96	12.9189	12.6408	0.385392	4.72354e-07	IP6K2
ENSG00000023697	7.90596	9.41357	8.18062	8.42485	8.87492	11.3891	10.9614	10.9199	12.1282	11.0763	0.39894	4.86055e-07	DERA
ENSG00000115419	16.5247	16.4975	16.7863	18.4443	22.1536	12.8638	13.2951	11.5125	12.5136	14.5435	-0.482388	4.90383e-07	GLS
ENSG00000080819	7.96249	7.53004	7.79375	8.81196	8.71823	10.2135	11.1131	10.5288	11.2388	10.2478	0.384664	5.02278e-07	CPOX
ENSG00000164403	8.83532	9.15289	8.02092	8.8595	10.5199	5.08269	5.40325	6.07989	5.02591	7.79246	-0.627671	5.0395e-07	SHROOM1
ENSG00000090097	5.58274	5.26179	5.72659	5.56249	5.53751	6.85264	7.25962	7.75485	6.93674	7.88104	0.406708	5.14008e-07	PCBP4
ENSG00000257642	0	0.216735	0.212422	0	0	1.94861	1.09668	1.38536	2.07506	1.33958	4.20999	5.21909e-07	RP11-474B16.1
ENSG00000226363	4.80913	4.35191	3.58911	4.46621	3.73044	6.89227	7.39989	7.74582	7.56535	5.63109	0.753826	5.2325e-07	AC009336.24
ENSG00000006576	1.74132	1.8923	1.91534	2.18529	1.68133	1.24419	1.17608	1.18022	1.12729	1.50982	-0.592434	5.25113e-07	PHTF2
ENSG00000273270	1.09046	1.15546	1.1986	0.912545	1.19977	1.67665	1.60273	1.67121	1.93797	1.58992	0.607542	5.28074e-07	RP11-212P7.2
ENSG00000141524	5.4452	4.69417	4.96398	4.90215	5.18567	6.21132	6.03458	6.98211	6.34425	6.74435	0.35972	5.32223e-07	TMC6
ENSG00000132716	7.92883	7.46515	7.30124	7.61236	8.0512	5.5226	4.5145	5.68891	4.55462	6.56721	-0.514224	5.40403e-07	DCAF8
ENSG00000187257	2.14404	2.6172	2.55703	2.7047	2.77036	2.03717	1.56892	1.57439	1.50187	1.84555	-0.585314	5.48354e-07	RSBN1L
ENSG00000157538	7.4785	7.70138	7.67352	7.58731	7.30616	6.31962	6.30063	5.57412	5.74985	6.36514	-0.316239	5.54555e-07	DSCR3
ENSG00000137267	8.60348	7.95777	7.36049	8.90417	6.63012	11.3565	10.8074	12.2576	11.104	10.8945	0.519627	5.59988e-07	TUBB2A
ENSG00000150347	1.13547	1.1514	0.985641	1.0805	0.615892	1.82724	1.49954	1.99518	1.78301	1.56142	0.807956	5.60924e-07	ARID5B
ENSG00000111450	9.60648	10.1793	9.77315	9.55756	9.54753	11.9089	12.1648	12.2742	13.1576	11.6876	0.330459	5.64806e-07	STX2
ENSG00000178913	33.5654	31.6028	34.8938	36.034	34.3192	25.3816	24.6309	24.1991	26.1944	30.266	-0.38292	5.68495e-07	TAF7
ENSG00000213551	3.83993	4.81366	4.3198	3.78262	4.82101	2.85517	2.90932	2.7243	2.68839	3.34709	-0.572791	5.87731e-07	DNAJC9
ENSG00000172869	3.32086	3.64878	3.69552	3.35919	3.14422	2.83695	2.74338	2.59914	2.46587	2.44158	-0.39115	5.90694e-07	DMXL1
ENSG00000196083	0.479983	0.506741	0.437532	0.556018	0.257449	0.801514	0.895402	0.957577	0.898447	0.702221	0.933511	5.92702e-07	IL1RAP
ENSG00000059758	22.8353	22.1909	23.2545	23.7063	21.6563	28.3138	26.7304	25.7799	27.338	28.3074	0.264478	5.9313e-07	CDK17
ENSG00000153130	6.62248	6.47494	7.21695	8.03983	6.39893	8.94227	9.3852	9.54627	8.90916	8.85111	0.393211	5.93637e-07	SCOC
ENSG00000106100	8.2325	8.453	8.48145	8.18882	7.16095	5.92583	5.30667	5.72465	6.1062	6.95532	-0.431422	6.10186e-07	NOD1
ENSG00000080986	1.20531	1.43777	1.02042	1.22517	1.07864	0.709889	0.464565	0.352111	0.52741	0.715002	-1.10121	6.18289e-07	NDC80
ENSG00000160410	21.6475	23.3682	22.1922	21.3061	18.4791	26.2735	27.2791	29.2746	28.2679	26.5323	0.363883	6.27268e-07	SHKBP1
ENSG00000096092	7.42275	6.89696	6.8185	6.72934	8.93294	12.5216	11.262	11.8838	11.9305	9.82304	0.63816	6.27838e-07	TMEM14A
ENSG00000161888	1.59787	1.34118	1.04748	0.98673	0.946922	0.565227	0.400583	0.558119	0.445856	0.561266	-1.21635	6.30211e-07	SPC24
ENSG00000078369	76.7581	73.3636	77.4013	73.1171	56.184	96.9796	96.8485	101.949	97.5622	88.782	0.434344	6.40862e-07	GNB1
ENSG00000077782	20.0681	20.6106	19.8652	19.4608	21.4299	14.7247	16.3108	16.2668	15.6204	18.1473	-0.323479	6.52184e-07	FGFR1
ENSG00000049246	0.43835	0.381983	0.359983	0.522508	0.448722	0.249501	0.189979	0.101734	0.187547	0.204312	-1.202	6.56491e-07	PER3
ENSG00000198624	1.67225	2.10903	2.00868	1.9219	1.70498	2.91628	2.70644	3.30038	3.58719	2.38123	0.661297	6.63679e-07	CCDC69
ENSG00000136478	4.99553	5.07012	5.20006	5.26292	3.99079	3.52909	3.56776	3.93076	3.45884	3.37632	-0.455854	6.65754e-07	TEX2
ENSG00000180964	41.4265	42.6973	43.2792	46.7749	44.8541	34.0448	35.6385	33.5053	34.7521	36.912	-0.325664	6.67423e-07	TCEAL8
ENSG00000125378	91.1931	88.5071	92.4976	87.5282	78.649	48.4022	52.1591	49.2933	48.7298	81.0915	-0.648295	6.68238e-07	BMP4
ENSG00000170004	40.3171	41.1116	44.8947	33.6861	36.8045	27.8464	25.4756	29.618	26.19	33.218	-0.467306	6.68788e-07	CHD3
ENSG00000122873	4.67137	4.6229	5.89835	4.98601	4.25173	6.24073	8.14851	8.87364	8.66156	6.47824	0.652456	6.70321e-07	CISD1
ENSG00000144357	5.03062	4.72379	5.16289	4.41852	4.5811	4.07517	3.64303	3.65303	3.47798	3.4897	-0.382188	6.72644e-07	UBR3
ENSG00000066422	3.07622	2.75969	3.1844	2.94959	3.16853	2.13175	2.10182	2.28189	2.22741	2.42962	-0.438554	6.88112e-07	ZBTB11
ENSG00000149308	4.77331	4.0826	4.31094	4.37487	3.22463	2.65845	2.73486	2.28821	2.05812	3.28637	-0.671234	6.90932e-07	NPAT
ENSG00000108840	10.5892	10.051	10.1342	9.43566	9.54109	8.12926	7.46427	7.68747	7.25275	8.62411	-0.344482	6.96756e-07	HDAC5
ENSG00000151552	7.3503	6.84597	6.67162	7.20922	6.28194	8.33493	10.2566	10.4839	10.0758	8.57482	0.474793	6.98205e-07	QDPR
ENSG00000155093	0.911415	0.861694	0.651508	0.591957	1.03008	1.56175	1.70254	1.27206	1.55833	1.34416	0.874428	6.99626e-07	PTPRN2
ENSG00000185112	243.233	252.36	236.046	256.072	233.168	281.101	290.47	289.759	279.016	301.859	0.24043	7.02167e-07	FAM43A
ENSG00000197457	0.375375	0.242634	0.166464	0.170155	0.385762	0.702914	0.736636	0.646207	1.16151	1.09975	1.69306	7.13262e-07	STMN3
ENSG00000130382	33.7228	35.2179	33.7088	31.812	27.9745	24.5805	21.8251	24.1336	22.7829	27.3861	-0.427203	7.23859e-07	MLLT1
ENSG00000153214	8.55577	7.05187	9.42989	9.66162	7.67212	12.2687	11.455	10.708	12.9685	11.8234	0.483684	7.2664e-07	TMEM87B
ENSG00000128928	11.1805	11.2194	11.4871	10.6652	11.9639	9.27923	8.5913	9.73062	8.09885	8.94007	-0.340554	7.27331e-07	IVD
ENSG00000130396	12.6026	12.8441	13.2047	11.8163	13.2623	10.6303	9.9566	10.3662	9.47032	11.0824	-0.307251	7.35836e-07	MLLT4
ENSG00000095794	3.034	2.98565	2.82393	3.37808	2.84777	3.82729	4.33149	4.15935	4.61981	3.84986	0.464439	7.43018e-07	CREM
ENSG00000105825	54.4619	53.4394	61.047	59.4908	59.0374	66.2618	82.0203	75.6371	75.5288	95.7146	0.458839	7.45299e-07	TFPI2
ENSG00000133884	6.59574	7.06368	6.56034	6.65943	7.26588	8.1349	9.05261	8.57663	8.64638	8.15821	0.3168	7.46916e-07	DPF2
ENSG00000198873	10.2279	9.47651	10.9456	10.8051	10.3408	12.744	13.0641	13.9345	14.0231	11.9595	0.343371	7.59175e-07	GRK5
ENSG00000205978	17.1489	17.7995	18.6108	16.7382	11.6652	11.9463	10.7725	11.7359	10.7723	10.8088	-0.548103	7.63989e-07	NYNRIN
ENSG00000162599	3.90039	4.08774	4.04394	3.82111	3.26487	2.85355	3.1012	2.79823	2.35763	2.25482	-0.516074	7.64399e-07	NFIA
ENSG00000070814	5.19985	5.21718	5.5425	4.53441	4.94834	3.731	3.68357	3.65848	3.57468	4.4288	-0.414972	7.75009e-07	TCOF1
ENSG00000133104	16.6136	16.8785	16.8804	17.3386	18.2781	13.0646	14.6008	13.7239	12.3764	14.729	-0.328732	7.80369e-07	SPG20
ENSG00000019144	7.05809	7.10737	7.31223	6.61551	5.24604	9.22871	8.54311	9.19101	9.11374	8.86194	0.431276	7.84925e-07	PHLDB1
ENSG00000112576	10.8327	10.8077	10.7233	10.2831	8.22004	13.337	14.2973	14.201	13.8534	12.6015	0.425985	7.8738e-07	CCND3
ENSG00000197265	9.65264	9.01004	9.39251	8.86576	9.4771	11.7033	12.8123	12.2364	13.1944	11.0291	0.393523	7.89242e-07	GTF2E2
ENSG00000196628	23.2229	23.0904	23.853	24.5046	22.3604	20.1471	18.9569	18.4171	18.8017	20.8961	-0.267456	7.93744e-07	TCF4
ENSG00000198742	6.10722	5.90577	5.98337	5.30878	5.34642	8.26715	7.04576	7.81646	8.09771	6.80629	0.409898	7.98437e-07	SMURF1
ENSG00000125520	25.4598	25.7435	24.6336	24.2236	27.3765	31.994	31.8091	34.1755	36.9187	29.6871	0.368405	7.98544e-07	SLC2A4RG
ENSG00000125686	11.7138	11.1764	11.9722	9.53806	8.17727	7.82434	7.43812	6.79627	7.08874	7.55832	-0.517556	8.06622e-07	MED1
ENSG00000116641	2.23493	1.84848	2.17404	1.79739	1.63777	3.25323	2.84878	2.85537	3.30818	2.32419	0.591854	8.15156e-07	DOCK7
ENSG00000138623	0.488238	0.566081	0.3789	0.567118	0.554563	0.855145	1.00913	1.13257	1.39533	0.867589	1.03864	8.16673e-07	SEMA7A
ENSG00000125875	10.17	10.6519	12	9.82305	9.82694	13.6885	12.9298	14.4021	13.4154	13.0223	0.36271	8.18124e-07	TBC1D20
ENSG00000188158	0.782363	0.684576	0.906075	0.861683	0.181156	0.233802	0.296065	0.205698	0.211628	0.168765	-1.6126	8.29968e-07	NHS
ENSG00000142207	6.46487	6.94034	6.94978	5.4605	4.86064	4.64114	4.0742	3.9374	3.83788	4.57733	-0.541153	8.39458e-07	URB1
ENSG00000183337	3.9936	3.88548	3.86959	3.9763	3.43777	5.0501	5.58261	5.05171	5.43706	4.41855	0.415238	8.5162e-07	BCOR
ENSG00000205542	1045.7	971.092	1026.22	1209.15	1339.31	1398.95	1637.59	1465.58	1623.43	1519.46	0.451252	8.51785e-07	TMSB4X
ENSG00000123472	5.21137	5.28182	4.94048	6.48837	6.62962	3.13023	3.98297	3.5391	2.86513	4.54489	-0.661642	8.54354e-07	ATPAF1
ENSG00000089327	18.2757	18.5657	19.8328	20.4318	14.1383	22.8358	26.3522	26.7877	27.0665	25.0222	0.489817	8.60028e-07	FXYD5
ENSG00000013583	13.1985	12.2203	14.2302	14.4764	15.9678	10.9299	10.3786	10.8825	10.5176	10.1134	-0.409331	8.61138e-07	HEBP1
ENSG00000107485	27.0415	25.6776	24.1808	27.4652	30.1487	16.0594	15.4648	15.957	14.9419	24.5294	-0.629388	8.62551e-07	GATA3
ENSG00000165637	35.8838	35.8604	34.4662	40.2692	32.6314	43.1186	45.1268	48.3813	46.1628	43.8562	0.339954	8.64512e-07	VDAC2
ENSG00000108654	103.4	108.965	106.948	115.753	137.917	74.0329	78.0851	73.1221	75.992	100.516	-0.512253	8.81342e-07	DDX5
ENSG00000162618	100.005	94.5288	102.319	107.511	63.2351	153.392	154.033	148.809	152.831	115.969	0.632916	8.81777e-07	ELTD1
ENSG00000105711	2.75771	3.58892	3.07625	3.24754	3.65976	4.48475	5.68447	5.82411	6.19892	3.90905	0.674124	8.95785e-07	SCN1B
ENSG00000164512	0.90484	0.878727	0.430621	0.480183	0.434499	0.159604	0.291932	0.0851024	0.106226	0.123436	-2.03161	8.97031e-07	ANKRD55
ENSG00000146463	11.5119	11.4755	12.6197	11.1614	8.75623	8.61139	7.96085	7.98155	7.70528	8.18267	-0.456427	8.98172e-07	ZMYM4
ENSG00000131873	15.8354	15.9578	16.2911	17.1244	14.0165	11.6297	12.6328	12.4706	12.7262	13.0405	-0.341621	9.03135e-07	CHSY1
ENSG00000205937	15.7504	16.5199	16.3474	15.9042	14.5719	18.6151	19.059	19.6152	20.0295	18.3886	0.275381	9.04505e-07	RNPS1
ENSG00000223773	3.109	3.3962	3.56497	3.43262	2.52239	5.5006	5.33281	5.41636	5.83616	3.55026	0.678802	9.04562e-07	CD99P1
ENSG00000137094	2.79003	2.84795	2.89026	2.72163	2.94932	3.91442	3.82693	4.37883	4.18991	3.32906	0.46684	9.05599e-07	DNAJB5
ENSG00000165233	8.38608	8.28394	7.7406	7.87351	9.64647	11.1689	12.854	11.4376	13.6192	10.1447	0.496401	9.11897e-07	C9orf89
ENSG00000111412	11.9439	10.6984	11.6701	9.51414	9.63608	8.21108	7.52055	7.42506	7.8381	8.84203	-0.42362	9.23068e-07	C12orf49
ENSG00000094804	1.50236	1.49896	1.13887	1.5832	0.923718	0.568788	0.640229	0.470398	0.865282	0.742134	-1.01255	9.24062e-07	CDC6
ENSG00000103479	9.40359	9.94001	10.1166	9.45338	10.7728	7.83503	8.27993	7.84457	7.47885	8.3389	-0.32194	9.59409e-07	RBL2
ENSG00000169239	0.552473	0.707618	0.527692	0.392985	0.73372	0.307344	0.164325	0.254012	0.302741	0.285235	-1.14875	9.63682e-07	CA5B
ENSG00000107819	21.4936	22.6105	22.6138	19.0868	18.7696	27.772	27.1866	27.55	28.2348	24.5091	0.37155	9.71001e-07	SFXN3
ENSG00000008311	7.10285	8.5528	7.29033	7.50389	8.95692	5.68305	5.69743	5.42547	4.71464	6.38089	-0.499088	9.7194e-07	AASS
ENSG00000166881	2.71823	3.15813	3.15658	2.8611	3.54102	2.19696	1.75799	2.18743	1.9071	2.37284	-0.567467	9.735e-07	TMEM194A
ENSG00000107036	6.05328	6.03179	6.80091	6.46604	5.30229	7.96954	7.86479	7.97507	7.7721	7.81144	0.362804	9.83554e-07	KIAA1432
ENSG00000117152	3.80654	4.08435	4.55773	3.59884	2.84125	1.91718	1.86748	2.28042	2.66977	1.08987	-0.942756	9.91589e-07	RGS4
ENSG00000130734	3.69415	3.94362	3.32761	3.55837	2.53507	6.02674	5.34475	8.17986	7.27909	4.27764	0.869539	9.98126e-07	ATG4D
ENSG00000063180	3.04167	2.75248	2.69771	2.95859	4.22261	4.55411	5.44851	5.03986	5.42915	5.2573	0.708561	1.00067e-06	CA11
ENSG00000143816	4.51982	5.10888	4.43455	4.53287	8.12383	9.23442	8.08632	9.8318	8.16018	11.1275	0.795195	1.00394e-06	WNT9A
ENSG00000187601	16.9083	15.2193	15.8737	19.3648	16.481	11.5044	13.4069	11.3581	11.7314	12.5758	-0.469347	1.00633e-06	MAGEH1
ENSG00000146426	0.632815	0.696467	0.884863	0.677068	0.785693	0.484448	0.365465	0.511129	0.367705	0.451726	-0.754254	1.02077e-06	TIAM2
ENSG00000003400	7.37223	6.58519	7.05276	6.79336	10.2935	4.66981	4.42872	3.84551	3.60677	6.17053	-0.745997	1.0286e-06	CASP10
ENSG00000124795	17.367	15.4021	16.2455	18.9838	15.3198	12.8241	12.6554	12.9202	13.0323	13.3224	-0.3629	1.03068e-06	DEK
ENSG00000137996	9.56832	8.99165	10.9055	10.1856	10.9993	12.681	14.5381	14.1076	12.6912	13.2581	0.407644	1.04712e-06	RTCA
ENSG00000183723	2.07349	2.24284	2.37062	2.034	2.01784	1.4644	1.54943	1.54604	1.42687	1.69127	-0.483624	1.05209e-06	CMTM4
ENSG00000058673	20.6519	21.8226	21.9414	22.4954	22.4231	17.2661	16.3312	15.8254	16.1224	19.9843	-0.354235	1.05275e-06	ZC3H11A
ENSG00000078140	14.8536	13.9859	14.7304	14.6137	13.051	19.1612	19.3358	17.6666	18.7032	16.0196	0.35201	1.05462e-06	UBE2K
ENSG00000169992	11.7274	13.8068	12.8912	11.942	11.7238	9.96968	8.3893	9.80963	8.80347	10.2143	-0.395402	1.06916e-06	NLGN2
ENSG00000149480	38.863	39.6063	39.1073	36.2738	36.0449	30.5581	29.6111	33.0067	29.3437	32.5527	-0.291908	1.07177e-06	MTA2
ENSG00000108312	16.3397	17.3726	17.202	16.6373	18.061	13.4537	12.9146	13.5406	12.5981	15.4332	-0.333698	1.11003e-06	UBTF
ENSG00000027075	19.1882	18.0663	19.825	19.8856	19.2601	15.9764	15.477	14.5913	15.0374	17.1843	-0.297896	1.11037e-06	PRKCH
ENSG00000106560	13.9201	12.852	13.8476	16.3147	16.4996	10.4297	11.4207	9.33926	8.60154	11.1641	-0.528344	1.12417e-06	GIMAP2
ENSG00000023734	61.0462	53.5471	56.3056	60.4923	46.0233	41.9603	44.3562	41.2214	40.9047	42.1323	-0.397107	1.13868e-06	STRAP
ENSG00000153187	46.8142	42.3774	45.2438	45.1093	49.2088	38.1116	36.1284	36.327	36.1855	40.477	-0.289011	1.14813e-06	HNRNPU
ENSG00000163320	18.7103	17.619	18.0321	19.5798	21.0794	13.0587	12.2353	11.885	12.3945	17.2998	-0.506801	1.15065e-06	CGGBP1
ENSG00000142657	132.686	116.681	124.051	122.2	97.1333	173.529	171.529	193.367	188.161	130.775	0.532598	1.15351e-06	PGD
ENSG00000072571	1.0189	1.22434	1.33331	1.45372	1.1257	0.649289	0.696848	0.595798	0.627103	0.76296	-0.885902	1.16062e-06	HMMR
ENSG00000154059	8.84968	9.45997	9.54443	9.30762	8.7764	6.29613	8.13433	6.71431	7.02641	6.06878	-0.424981	1.16987e-06	IMPACT
ENSG00000198060	10.7587	10.3395	11.0779	10.2683	9.35054	11.9969	14.0525	13.2179	13.5542	13.2707	0.352282	1.17342e-06	2023-03-05
ENSG00000258602	0	0	0	0	0	1.02294	1.95741	0.763615	1.96077	0	5.94595	1.18092e-06	RP11-7F17.7
ENSG00000078804	23.9	22.6831	22.742	20.0884	12.4106	34.4113	30.0469	34.3283	34.2492	30.5995	0.6851	1.19048e-06	TP53INP2
ENSG00000267045	4.00183	2.97469	4.56339	3.88713	4.11255	0.646006	1.018	1.10226	2.06378	1.3323	-1.6689	1.1932e-06	AC006126.4
ENSG00000110888	2.78896	2.77902	2.2026	2.47871	2.92461	3.60476	3.61909	3.59496	3.75572	3.38124	0.44593	1.19378e-06	CAPRIN2
ENSG00000180730	1.51718	0.936091	1.28445	1.00032	0.539612	4.59252	4.67814	4.12192	4.80201	1.35	1.89227	1.1939e-06	SHISA2
ENSG00000111640	464.709	423.142	445.374	411.321	390.72	511.925	533.429	593.914	577.713	496.29	0.345657	1.19679e-06	GAPDH
ENSG00000103126	3.83735	3.97314	4.7352	4.10779	4.34866	5.1677	5.78997	5.86648	5.85808	5.16514	0.405418	1.2077e-06	AXIN1
ENSG00000114423	2.70418	2.87922	2.41317	2.58245	2.4177	3.63422	3.29967	3.23859	3.33017	3.35934	0.377311	1.21812e-06	CBLB
ENSG00000184640	17.4138	16.8976	17.6464	16.9564	14.7095	13.9095	13.5003	14.0093	12.8609	13.2363	-0.308267	1.22397e-06	SEPT9
ENSG00000170088	5.83076	5.1283	5.38916	5.84249	4.849	4.17054	4.42374	3.97419	3.82079	3.46146	-0.445093	1.23798e-06	TMEM192
ENSG00000131966	12.5499	11.5776	11.5205	12.8089	11.8943	15.2297	15.8341	14.7662	16.7194	14.0203	0.34358	1.24347e-06	ACTR10
ENSG00000131473	72.1965	69.2783	75.6454	63.1101	49.4496	48.5759	44.2649	45.8251	45.5896	49.703	-0.494577	1.24834e-06	ACLY
ENSG00000049192	1.32763	1.13196	1.30001	1.53059	1.3656	1.91472	1.8741	2.05669	2.18672	1.69543	0.546877	1.2507e-06	ADAMTS6
ENSG00000185022	17.1814	17.3265	18.9209	19.1401	27.5256	28.2689	27.3028	31.9135	30.5497	35.9851	0.620731	1.26653e-06	MAFF
ENSG00000181045	6.00723	6.21269	6.49342	6.11466	7.61527	8.52153	8.25473	8.5446	8.77762	8.62478	0.394783	1.29527e-06	SLC26A11
ENSG00000129925	46.0521	42.3694	46.6794	40.4097	29.6664	58.3367	56.6078	66.1022	61.3394	55.1256	0.536425	1.29775e-06	TMEM8A
ENSG00000177374	6.87607	6.53052	7.35707	6.40281	6.38566	8.55424	8.75409	8.28599	8.86736	7.78546	0.332744	1.32177e-06	HIC1
ENSG00000129195	0.931553	1.07481	1.05342	1.41459	1.00519	0.442113	0.592432	0.449026	0.403544	0.586156	-1.14945	1.32369e-06	FAM64A
ENSG00000115993	9.01646	9.76612	9.35008	8.36173	6.35104	14.0653	12.4024	13.3292	12.9698	10.446	0.561842	1.32765e-06	TRAK2
ENSG00000081189	7.5448	6.49625	7.06928	7.38854	6.48244	5.83453	5.69324	5.23546	5.42212	5.17389	-0.353647	1.33357e-06	MEF2C
ENSG00000087157	8.63349	9.70593	9.05478	8.42721	10.7388	11.8745	11.803	11.7697	13.1805	13.9729	0.425924	1.33858e-06	PGS1
ENSG00000178234	5.96019	5.87407	5.86263	5.65489	5.4915	7.17203	7.27444	7.13646	7.07283	6.66424	0.292959	1.34232e-06	GALNT11
ENSG00000179277	0.754893	1.30414	2.13032	0.871021	1.19522	3.16395	3.28202	2.44787	3.63351	3.32658	1.33545	1.35676e-06	MEIS3P1
ENSG00000168434	3.96616	4.41101	4.30981	4.35046	4.04642	3.35275	2.92667	3.16681	2.97283	3.07629	-0.443263	1.40449e-06	COG7
ENSG00000258947	0.133566	0.147727	0.131625	0.242178	0.280946	0.603717	0.271818	0.801192	0.657179	0.594875	1.63382	1.42075e-06	TUBB3
ENSG00000171853	3.54002	3.49469	3.34903	3.99383	2.9243	2.25628	2.35047	2.02695	2.62988	2.73997	-0.52621	1.42079e-06	TRAPPC12
ENSG00000161091	8.79581	8.34288	8.74042	8.2678	5.77365	11.8257	10.4967	12.0707	11.5017	11.4512	0.524248	1.42242e-06	MFSD12
ENSG00000163528	4.63772	3.69318	3.09319	4.84356	3.82086	2.58257	2.3029	2.11028	2.07154	2.421	-0.802719	1.43262e-06	CHCHD4
ENSG00000143549	61.8415	55.4443	61.0903	63.2546	43.9738	76.556	78.9228	82.1394	83.4551	71.9008	0.460551	1.44686e-06	TPM3
ENSG00000145293	16.2332	14.9249	17.7377	14.9816	18.0204	11.2408	11.992	11.737	12.189	13.5283	-0.433527	1.45296e-06	ENOPH1
ENSG00000178033	4.93889	4.5423	5.10153	4.28866	3.89252	3.03116	3.03582	3.07701	3.34429	3.82097	-0.479811	1.45589e-06	FAM26E
ENSG00000116337	7.6411	7.68196	8.66574	6.77006	6.68353	9.28552	9.38309	11.2306	10.222	10.3835	0.432311	1.45942e-06	AMPD2
ENSG00000157227	188.249	201.205	204.425	212.161	141.689	272.413	285.738	310.383	307.117	221.173	0.559644	1.46733e-06	MMP14
ENSG00000170881	11.7122	11.414	11.5756	10.883	10.6942	14.572	13.9741	14.4835	13.5955	13.9823	0.328591	1.49064e-06	RNF139
ENSG00000055147	3.83835	3.87351	4.56285	4.22675	4.29129	2.37985	2.63786	2.73165	2.58264	3.68109	-0.569667	1.50353e-06	FAM114A2
ENSG00000133398	13.8133	14.1772	13.523	14.5519	14.2995	16.1543	19.0729	18.3397	20.165	18.2228	0.385064	1.5334e-06	MED10
ENSG00000143669	1.06255	1.01613	1.18023	1.01799	1.36046	0.799949	0.750353	0.533175	0.664708	0.853016	-0.647469	1.5395e-06	LYST
ENSG00000163125	7.0048	6.7065	7.39385	6.17991	5.1789	4.56389	4.26435	4.838	4.61378	5.02884	-0.476724	1.53954e-06	RPRD2
ENSG00000166979	3.95704	4.44187	3.77749	3.50524	3.01926	5.32476	4.93317	5.41635	6.0047	5.29371	0.531231	1.56872e-06	EVA1C
ENSG00000272168	0.942487	1.09808	1.06056	1.1535	0.923322	1.57621	1.76219	1.44239	1.85428	1.25197	0.607031	1.59379e-06	CASC15
ENSG00000144566	16.0496	14.3665	15.8831	15.7628	17.2434	13.0799	12.8139	11.7215	12.3067	12.9049	-0.336555	1.62711e-06	RAB5A
ENSG00000125898	1.08688	1.48625	1.43526	1.48897	0.859598	2.27075	2.11358	2.74755	2.65061	2.00384	0.894856	1.64712e-06	FAM110A
ENSG00000068001	67.6971	69.3767	67.8294	68.3497	53.5077	77.4912	86.0909	94.9654	86.7946	85.9081	0.400481	1.65731e-06	HYAL2
ENSG00000135930	8.72072	8.51332	9.20513	9.08532	9.20479	10.1856	11.9123	11.2772	11.261	10.6826	0.305627	1.69156e-06	EIF4E2
ENSG00000160113	20.6372	19.9424	19.3713	22.2062	17.4689	24.4748	25.199	26.9057	25.117	25.7419	0.356337	1.7026e-06	NR2F6
ENSG00000142327	17.5047	18.3299	17.0268	16.0767	11.8001	23.522	21.6876	24.6111	23.3454	21.4939	0.506582	1.70373e-06	RNPEPL1
ENSG00000153774	6.58038	6.88743	7.2426	8.35552	8.85508	4.83774	6.05041	4.28011	5.22799	5.28422	-0.564806	1.70797e-06	CFDP1
ENSG00000110318	1.78186	1.85214	1.87224	1.87009	0.905598	1.00856	0.890223	0.82794	0.934928	0.837996	-0.877137	1.71939e-06	KIAA1377
ENSG00000175040	8.81936	6.66479	8.1032	6.76151	4.54631	10.7538	11.6112	11.54	11.9363	10.0984	0.682995	1.7332e-06	CHST2
ENSG00000171044	0.68155	0.513961	0.537316	0.549228	0.678563	1.09532	1.02741	1.07073	0.886948	1.09418	0.804864	1.73646e-06	XKR6
ENSG00000101493	4.82461	5.00307	5.22994	4.80913	4.76206	7.03036	6.21185	6.94195	6.9012	5.45957	0.402285	1.73668e-06	ZNF516
ENSG00000070404	3.7291	4.05728	4.14861	4.27967	2.51366	6.44989	6.60201	7.06531	8.19647	4.4809	0.810146	1.74111e-06	FSTL3
ENSG00000211456	5.44591	4.71775	4.45732	5.04256	5.18014	3.67007	3.4668	3.41383	3.48642	4.29301	-0.437866	1.74348e-06	SACM1L
ENSG00000065308	56.7602	56.4881	58.7236	50.4483	34.6063	35.8419	35.2306	34.5159	31.6354	35.2208	-0.575605	1.74389e-06	TRAM2
ENSG00000236452	0.236917	0.214392	0.105063	0.322177	0	1.28503	1.20536	1.25618	1.71052	1.87723	3.11567	1.75024e-06	AC123023.1
ENSG00000103490	4.71016	4.22653	4.66901	4.44957	4.31597	6.86999	5.67883	6.52497	7.20148	6.64146	0.559705	1.75972e-06	PYCARD
ENSG00000169860	1.37008	1.25753	1.12836	1.01142	1.42281	0.583886	0.617392	0.471718	0.659459	0.802792	-0.981824	1.77618e-06	P2RY1
ENSG00000106348	30.4126	28.2035	31.2568	29.0201	22.3632	37.831	38.034	41.9533	43.0166	34.2913	0.466624	1.78933e-06	IMPDH1
ENSG00000256268	0.734574	0.398841	0.84696	0.332976	0.834361	1.92575	2.54135	1.55794	2.61642	1.57495	1.68847	1.80516e-06	RP11-221N13.3
ENSG00000042493	7.71683	7.23419	7.94018	8.25338	5.53787	12.0142	14.1904	15.0731	15.1486	7.66368	0.805783	1.81673e-06	CAPG
ENSG00000114999	4.42976	4.21282	4.28466	4.20538	3.69294	6.1465	5.72362	5.7772	5.41893	4.6241	0.411736	1.82813e-06	TTL
ENSG00000162755	0.229341	0.449662	0.203407	0.797013	0.578879	1.03661	1.63354	1.6582	1.54543	1.17583	1.629	1.8438e-06	KLHDC9
novel.126	0.593234	0.284206	0.340451	0.50618	0.290668	1.32493	1.02974	1.11016	1.41091	0.780712	1.50554	1.84451e-06	-
ENSG00000117620	4.23477	3.80356	3.81196	4.33578	3.94057	3.12352	2.8727	2.90445	2.80902	3.32894	-0.418822	1.84989e-06	SLC35A3
ENSG00000068305	7.96527	7.30249	7.63713	7.66013	5.7296	5.25238	5.12961	5.30836	5.15453	5.69052	-0.450235	1.86575e-06	MEF2A
ENSG00000013523	7.65727	8.30844	8.13222	6.89738	9.23262	4.83327	5.06514	5.21354	5.00492	7.11508	-0.563374	1.87873e-06	ANGEL1
ENSG00000135919	0.695081	0.709295	0.74109	0.744112	0.604727	1.14306	1.1813	0.84117	1.18165	1.14424	0.654639	1.90024e-06	SERPINE2
ENSG00000167992	2.5224	3.03938	2.84731	2.8982	2.6046	4.21905	4.22741	4.01814	4.02537	3.2441	0.504071	1.90785e-06	VWCE
ENSG00000130962	8.3191	8.10579	9.02012	10.4932	6.37197	12.9059	13.7584	13.1273	12.8319	10.373	0.574847	1.92687e-06	PRRG1
ENSG00000180573	0.748886	0.499348	1.22353	1.03626	0.925234	2.20912	1.80479	2.62183	1.55567	2.13104	1.21638	1.93006e-06	HIST1H2AC
ENSG00000182534	10.6745	10.3666	10.3682	9.77389	9.41139	12.0894	12.177	13.9262	13.1815	11.8573	0.322134	1.97184e-06	MXRA7
ENSG00000008282	27.0131	29.1933	27.7567	28.8627	31.1459	32.673	37.9979	36.2496	36.5374	35.337	0.311402	1.98812e-06	SYPL1
ENSG00000138386	8.19282	8.02259	7.97034	9.36666	9.30067	6.59146	6.06416	5.74531	5.86659	7.33625	-0.439442	1.98901e-06	NAB1
ENSG00000172974	24.0291	23.1627	27.3349	21.3108	23.2248	32.7183	38.7261	34.9633	37.1402	27.2691	0.520124	1.99932e-06	AC007318.5
ENSG00000170855	21.93	20.1751	23.0086	23.2707	23.4072	28.7271	33.8198	31.3384	30.5912	25.5429	0.423114	2.01925e-06	TRIAP1
ENSG00000196177	2.75336	2.71031	2.59114	2.89629	2.61809	2.08052	2.11728	1.9249	1.8918	1.94947	-0.444834	2.02658e-06	ACADSB
ENSG00000267427	42.2977	44.3304	46.4428	40.387	38.5391	32.8674	32.9875	31.9462	31.2684	36.8648	-0.352924	2.03879e-06	CTC-503J8.6
ENSG00000154518	8.44592	7.66926	8.9271	9.336	9.88328	10.9223	13.2413	12.0777	13.0406	10.612	0.435343	2.04919e-06	ATP5G3
ENSG00000172059	3.33808	3.30593	3.10038	3.93541	3.48235	4.48108	4.63573	4.46105	4.74428	5.02146	0.443522	2.0653e-06	KLF11
ENSG00000087206	6.79779	7.04284	7.23492	7.86066	7.58466	5.3927	5.47715	5.71075	5.71593	6.10402	-0.36366	2.07619e-06	UIMC1
ENSG00000135090	2.56882	2.13322	2.25627	2.36832	2.16184	1.60249	1.462	1.70293	1.79629	1.8206	-0.452255	2.0803e-06	TAOK3
ENSG00000168090	31.2209	28.9945	30.3702	28.4318	29.9907	36.7775	38.3224	40.304	41.4187	32.8154	0.347782	2.09482e-06	COPS6
ENSG00000166803	1.84873	1.19497	1.90515	2.21874	2.30652	0.684413	0.609136	0.95053	0.661028	1.37869	-1.14482	2.10822e-06	KIAA0101
ENSG00000115561	9.77516	9.35103	9.11626	8.67944	8.18521	7.19843	7.27369	6.803	6.83731	7.60208	-0.335678	2.1092e-06	CHMP3
ENSG00000176438	1.58895	1.81783	1.71745	1.54552	2.16796	1.30553	1.14172	1.20382	1.29617	1.31587	-0.498249	2.12209e-06	SYNE3
ENSG00000179295	25.3166	22.6886	24.3542	22.9261	18.466	18.3582	17.3077	16.8415	16.8174	16.9859	-0.397685	2.12998e-06	PTPN11
ENSG00000163714	8.01255	7.97852	7.66243	8.33623	8.33756	6.55372	6.75112	6.03701	6.67161	6.99513	-0.289129	2.13123e-06	U2SURP
ENSG00000136986	7.62267	6.6711	7.36183	7.33144	6.39783	8.39324	9.17348	8.84331	8.9647	9.17428	0.333371	2.15186e-06	DERL1
ENSG00000132155	10.7577	9.93206	10.6559	10.6111	8.91371	13.0499	12.2081	13.4562	13.4853	12.1291	0.339577	2.15714e-06	RAF1
ENSG00000175893	7.30958	7.68761	7.62743	8.53635	8.0279	6.76545	6.50096	5.6414	5.94217	5.76059	-0.356718	2.17194e-06	ZDHHC21
ENSG00000165406	1.72667	1.78347	1.43861	1.55747	1.7169	1.17462	0.887351	1.01724	1.21726	1.1706	-0.586983	2.17892e-06	2023-03-08
ENSG00000237854	15.6747	15.4814	17.0005	16.2405	17.6345	11.8217	9.56979	7.0806	10.6919	12.2739	-0.672645	2.1956e-06	LINC00674
ENSG00000089057	11.8891	13.0704	12.9345	11.2464	9.65198	9.33997	8.6615	8.99886	8.68279	8.34271	-0.416585	2.19851e-06	SLC23A2
ENSG00000198324	6.14214	5.62899	6.41913	5.62156	3.80672	7.78052	8.04123	9.14588	9.77301	7.89551	0.628865	2.23723e-06	FAM109A
ENSG00000058600	4.37233	4.52098	4.17905	3.62466	4.84298	3.04429	2.70043	3.15965	2.78158	3.62367	-0.492634	2.24261e-06	POLR3E
ENSG00000087085	0.0176211	0	0.0468855	0.079875	0.106746	0.414164	0.143441	0.645521	0.407114	0.21354	2.82089	2.24505e-06	ACHE
ENSG00000153786	18.7889	19.9117	18.7472	20.3407	16.8258	23.7158	25.4064	25.1143	25.6396	21.4741	0.359423	2.26057e-06	ZDHHC7
ENSG00000111737	22.3125	22.41	23.2544	23.5921	21.5621	27.2633	25.2653	29.3735	27.8208	27.8545	0.282674	2.2618e-06	RAB35
ENSG00000183580	13.9101	14.5732	15.4604	11.9721	9.75364	19.1129	18.578	19.5337	20.4966	17.2595	0.533182	2.27147e-06	FBXL7
ENSG00000170448	2.52186	2.9057	2.9129	3.04394	2.91995	2.23999	1.80522	1.55482	2.08894	1.89981	-0.576806	2.31542e-06	NFXL1
ENSG00000158828	7.58588	7.41827	8.3076	8.14669	7.80313	5.16164	5.36729	6.31703	6.72677	5.79149	-0.419441	2.32332e-06	PINK1
ENSG00000138756	1.98463	1.85581	1.98904	1.8832	1.9136	2.89448	2.95512	2.85076	2.68747	2.09672	0.486051	2.32772e-06	BMP2K
ENSG00000038210	3.3177	3.67576	3.71396	4.06456	2.81102	2.28587	2.68247	2.35989	2.36514	2.57448	-0.518536	2.33346e-06	PI4K2B
ENSG00000012211	2.63471	2.58912	1.93515	2.59386	2.19771	3.55404	3.16265	3.94885	3.54689	3.85675	0.600213	2.33777e-06	PRICKLE3
ENSG00000125249	10.2216	9.22848	10.0289	10.4866	7.27537	7.15965	7.19417	6.23559	6.72661	5.82051	-0.510667	2.33929e-06	RAP2A
ENSG00000120693	1.80357	1.73606	1.7117	1.69758	1.83546	1.03849	1.37933	1.04101	1.12799	1.26363	-0.58874	2.35448e-06	SMAD9
ENSG00000132780	9.42145	10.3025	10.1677	9.99838	12.9675	6.86366	7.1296	6.88449	7.77396	8.95229	-0.491868	2.35671e-06	NASP
ENSG00000136011	0.13449	0.185758	0.0753359	0.179681	0.385919	0.0255954	0.0288103	0.0136477	0.0272563	0.0791808	-2.46413	2.36386e-06	STAB2
ENSG00000166068	4.505	3.94705	4.39796	4.03364	3.03764	2.84931	2.89133	2.73163	2.84265	2.25556	-0.552461	2.36979e-06	SPRED1
ENSG00000078177	1.61102	1.54859	1.45256	1.62415	1.43757	1.22672	1.0339	0.857096	1.01031	1.14035	-0.539809	2.38351e-06	N4BP2
ENSG00000112419	20.2552	18.7906	19.3102	17.5293	14.6281	14.5404	13.4284	12.9087	12.7774	14.1584	-0.416095	2.39218e-06	PHACTR2
ENSG00000175354	1.95685	1.79659	2.25792	2.29076	2.5032	1.45125	1.35322	1.28207	1.62772	1.52307	-0.580175	2.43606e-06	PTPN2
ENSG00000276107	62.2463	72.7236	65.6285	55.4557	49.376	43.1352	38.3314	46.0002	36.0912	46.1526	-0.541297	2.44734e-06	CTD-2033D15.2
ENSG00000149923	49.3924	45.2188	48.2646	48.2882	43.7928	55.0197	54.5407	64.9564	62.1549	57.7666	0.325929	2.47231e-06	PPP4C
ENSG00000146909	5.61376	6.38634	5.8849	6.3368	6.4307	4.91456	5.2226	4.7771	4.77026	4.55631	-0.339917	2.48076e-06	NOM1
ENSG00000179776	320.839	326.877	334.482	297.854	248.834	398.234	387.774	415.419	396.013	384.73	0.374642	2.50089e-06	CDH5
[truncated: 5,204 more rows]
